# Supplementary material
Source: publisher figshare collection journal article supplement (https://acs.figshare.com/ndownloader/files/21393510)
Supplement: Supplementary file 1 [file 21393510]

# Supporting Information

## Organocatalytic Asymmetric Hetero-Diels–Alder Reaction of in-situ Generated Dienes: Access to $\alpha,\beta$ -Unsaturated $\delta$ -Lactones Featuring CF<sub>3</sub>-Substituted Quaternary Stereocenter

Harshit Joshi, Ankit Yadav, Arko Das, and Vinod K. Singh\*

Department of Chemistry, Indian Institute of Technology Kanpur, Kanpur, UP – 208 016, India

Email: [vinodks@iitk.ac.in](mailto:vinodks@iitk.ac.in)

### Table of contents:

|                                                                    |         |
|--------------------------------------------------------------------|---------|
| 1. X-ray crystal structure and crystallographic data of <b>4ac</b> | S2-S3   |
| 2. X-ray crystal structure and crystallographic data of <b>6</b>   | S4-S5   |
| 3. References                                                      | S5      |
| 4. NMR spectra                                                     | S6-S51  |
| 5. HPLC graph                                                      | S52-S71 |

**1. X-ray crystal structure and crystallographic data of 4ac (CCDC 1951698):**

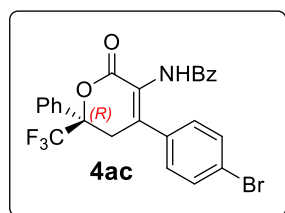

**Sample preparation:** 50.0 mg of compound **4ac** was taken in a vial and dissolved in 5 mL of ethyl acetate then 0.2 mL n-hexane was added to it (dropwise). The solvents were allowed to evaporate slowly at room temperature, which yielded block-shaped transparent crystals of compound **4ac** in two weeks.

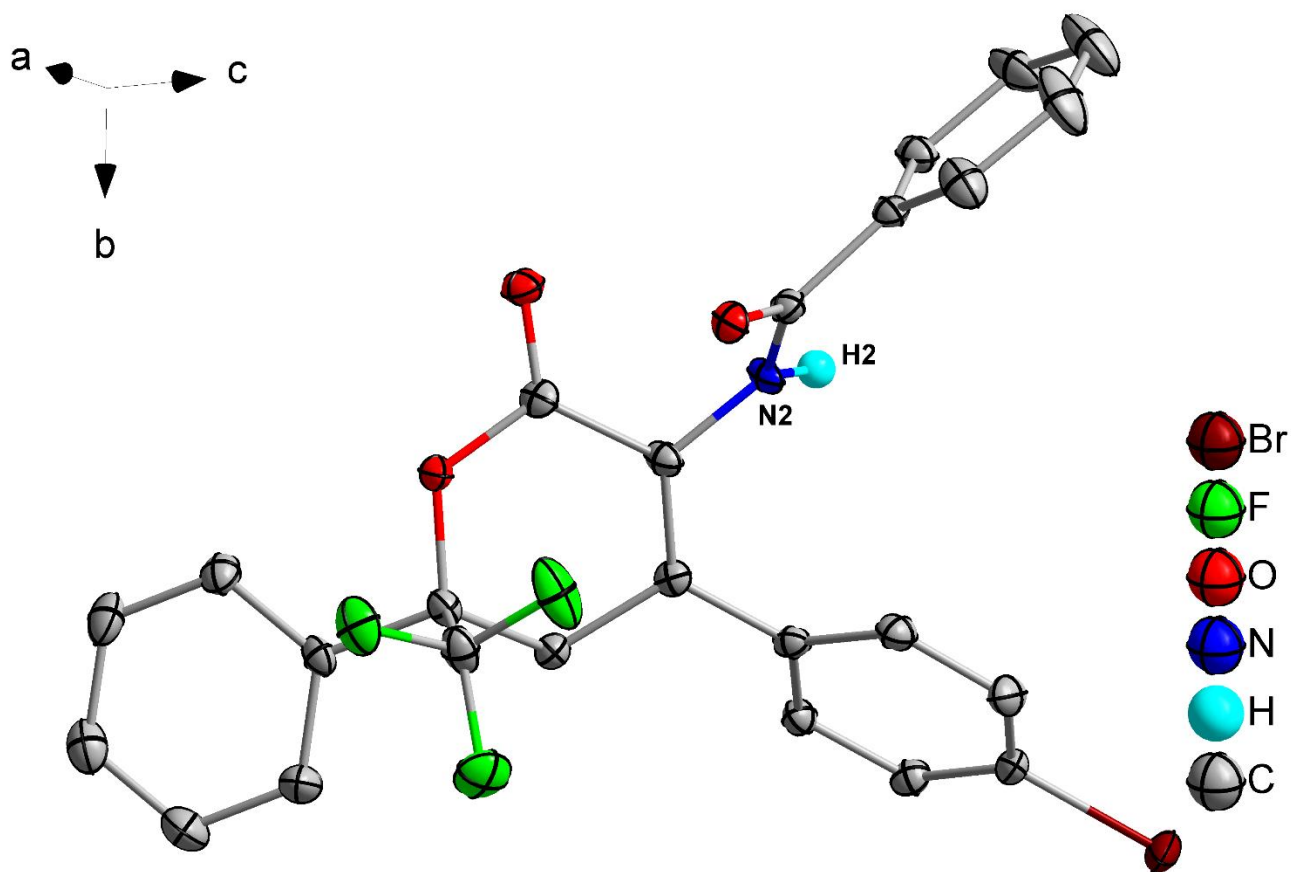

**Figure S1:** Molecular structure of **4ac** with ellipsoids set at 50% probability. All hydrogen atoms except N-H are omitted for clarity.

**Crystal structure determination for compound 4ac:** The crystal structure was solved by SHELXT<sup>1a</sup> structure solution program and refined by full matrix least-squares method based on  $F^2$  by SHELXL<sup>1b</sup> program in the Olex 2<sup>1c</sup> software. All the crystallographic figures were generated using the Diamond 3.2k software.<sup>1d</sup>

**Table S1:** Crystal data for 4ac

|                                                |                                                                  |
|------------------------------------------------|------------------------------------------------------------------|
| Identification code                            | 4ac                                                              |
| Empirical formula                              | C <sub>25</sub> H <sub>17</sub> BrF <sub>3</sub> NO <sub>3</sub> |
| Formula weight                                 | 516.30                                                           |
| Temperature/K                                  | 273.15                                                           |
| Crystal system                                 | monoclinic                                                       |
| Space group                                    | P2 <sub>1</sub>                                                  |
| a/Å                                            | 9.8347(5)                                                        |
| b/Å                                            | 22.0058(12)                                                      |
| c/Å                                            | 10.1652(6)                                                       |
| $\alpha/^\circ$                                | 90                                                               |
| $\beta/^\circ$                                 | 94.998(2)                                                        |
| $\gamma/^\circ$                                | 90                                                               |
| Volume/Å <sup>3</sup>                          | 2191.6(2)                                                        |
| Z                                              | 4                                                                |
| $\rho_{\text{calc}}/\text{cm}^3$               | 1.565                                                            |
| $\mu/\text{mm}^{-1}$                           | 1.929                                                            |
| F(000)                                         | 1040.0                                                           |
| Crystal size/mm <sup>3</sup>                   | 0.052 × 0.023 × 0.015                                            |
| Radiation                                      | MoK $\alpha$ ( $\lambda$ = 0.71073)                              |
| 2 $\theta$ range for data collection/ $^\circ$ | 5.468 to 56.556                                                  |
| Index ranges                                   | -13 ≤ h ≤ 13, -29 ≤ k ≤ 29, -13 ≤ l ≤ 13                         |
| Reflections collected                          | 33659                                                            |
| Independent reflections                        | 10757 [ $R_{\text{int}}$ = 0.0466, $R_{\text{sigma}}$ = 0.0610]  |
| Data/restraints/parameters                     | 10757/1/595                                                      |
| Goodness-of-fit on $F^2$                       | 1.013                                                            |
| Final R indexes [ $I \geq 2\sigma(I)$ ]        | $R_1$ = 0.0293, $wR_2$ = 0.0685                                  |
| Final R indexes [all data]                     | $R_1$ = 0.0329, $wR_2$ = 0.0701                                  |
| Largest diff. peak/hole / e Å <sup>-3</sup>    | 0.86/-0.58                                                       |
| Flack parameter                                | 0.034(3)                                                         |

## 2. X-ray crystal structure and crystallographic data of **6** (CCDC 1951699):

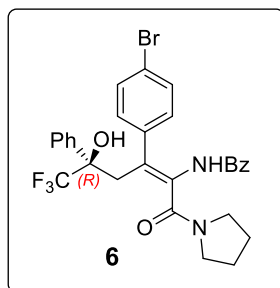

**Sample preparation:** 30.0 mg of compound **6** was taken in a vial and dissolved in 5 mL of ethyl acetate then 0.2 mL n-hexane was added to it in a dropwise manner. The solvents were allowed to evaporate slowly at room temperature, which yielded block-shaped transparent crystals of compound **6** in one week.

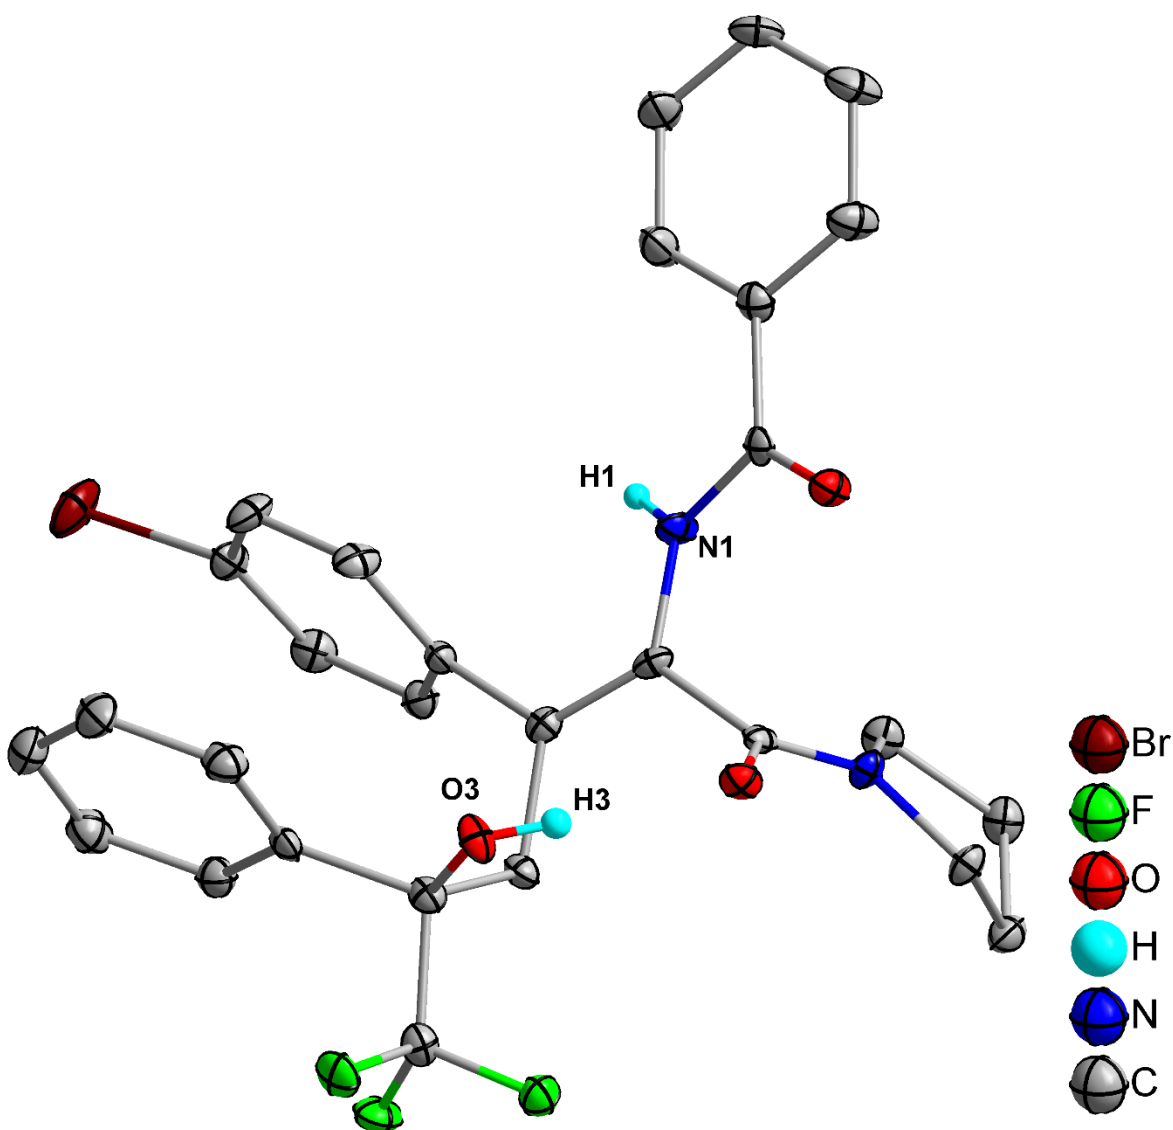

**Figure S2:** Molecular structure of **6** with ellipsoids set at 50% probability. All hydrogen atoms except N-H and O-H are omitted for clarity.

**Crystal structure determination for compound 6:** The crystal structure was solved by SHELXT<sup>1a</sup> structure solution program and refined by full matrix least-squares method based on  $F^2$  by SHELXL<sup>1b</sup> program in the Olex 2<sup>1c</sup> software. All the crystallographic figures were generated using the Diamond 3.2k<sup>1d</sup> software.

**Table S2:** Crystal data for compound 6

|                                                |                                                                                |
|------------------------------------------------|--------------------------------------------------------------------------------|
| Identification code                            | 6                                                                              |
| Empirical formula                              | C <sub>29</sub> H <sub>26</sub> BrF <sub>3</sub> N <sub>2</sub> O <sub>3</sub> |
| Formula weight                                 | 587.42                                                                         |
| Temperature/K                                  | 273.15                                                                         |
| Crystal system                                 | orthorhombic                                                                   |
| Space group                                    | P2 <sub>1</sub> 2 <sub>1</sub> 2 <sub>1</sub>                                  |
| a/Å                                            | 10.6343(5)                                                                     |
| b/Å                                            | 11.7382(5)                                                                     |
| c/Å                                            | 20.6645(10)                                                                    |
| $\alpha/^\circ$                                | 90                                                                             |
| $\beta/^\circ$                                 | 90                                                                             |
| $\gamma/^\circ$                                | 90                                                                             |
| Volume/Å <sup>3</sup>                          | 2579.5(2)                                                                      |
| Z                                              | 4                                                                              |
| $\rho_{\text{calc}}/\text{cm}^3$               | 1.513                                                                          |
| $\mu/\text{mm}^{-1}$                           | 1.650                                                                          |
| F(000)                                         | 1200.0                                                                         |
| Crystal size/mm <sup>3</sup>                   | 0.029 × 0.026 × 0.023                                                          |
| Radiation                                      | MoK $\alpha$ ( $\lambda$ = 0.71073)                                            |
| 2 $\theta$ range for data collection/ $^\circ$ | 5.532 to 51.988                                                                |
| Index ranges                                   | -13 ≤ h ≤ 13, -14 ≤ k ≤ 14, -25 ≤ l ≤ 25                                       |
| Reflections collected                          | 34484                                                                          |
| Independent reflections                        | 5062 [R <sub>int</sub> = 0.0841, R <sub>sigma</sub> = 0.0541]                  |
| Data/restraints/parameters                     | 5062/0/344                                                                     |
| Goodness-of-fit on F <sup>2</sup>              | 1.064                                                                          |
| Final R indexes [I ≥ 2 $\sigma$ (I)]           | R <sub>1</sub> = 0.0292, wR <sub>2</sub> = 0.0636                              |
| Final R indexes [all data]                     | R <sub>1</sub> = 0.0375, wR <sub>2</sub> = 0.0688                              |
| Largest diff. peak/hole / e Å <sup>-3</sup>    | 0.26/-0.30                                                                     |
| Flack parameter                                | 0.022(5)                                                                       |

- 3. References:** 1 (a) Sheldrick, G. M. SHELXT - Integrated Space-Group and Crystal-Structure Determination. *Acta Cryst.* **2015**, A71, 3. (b) Sheldrick, G. M. Crystal Structure Refinement with SHELXL. *Acta Cryst.* **2015**, C71, 3. (c) Dolomanov, O. V.; Bourhis, L. J.; Gildea, R. J.; Howard, J. A. K.; Puschmann, H. OLEX2: A Complete Structure Solution, Refinement and Analysis Program. *J. Appl. Crystallogr.* **2009**, 42, 339. (d) Brandenburg, K.; DIAMOND. Version 3.2k, Crystal Impact GbR, Bonn, Germany, **2014**.

#### 4. NMR spectra:

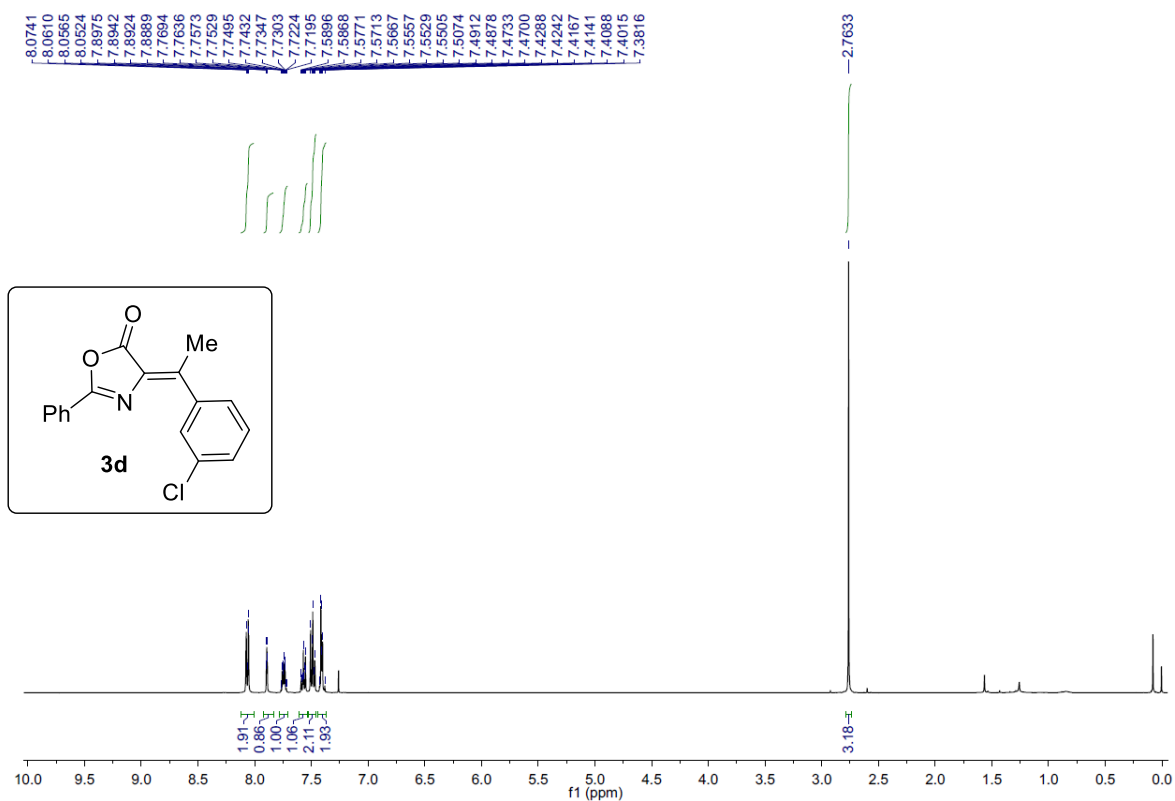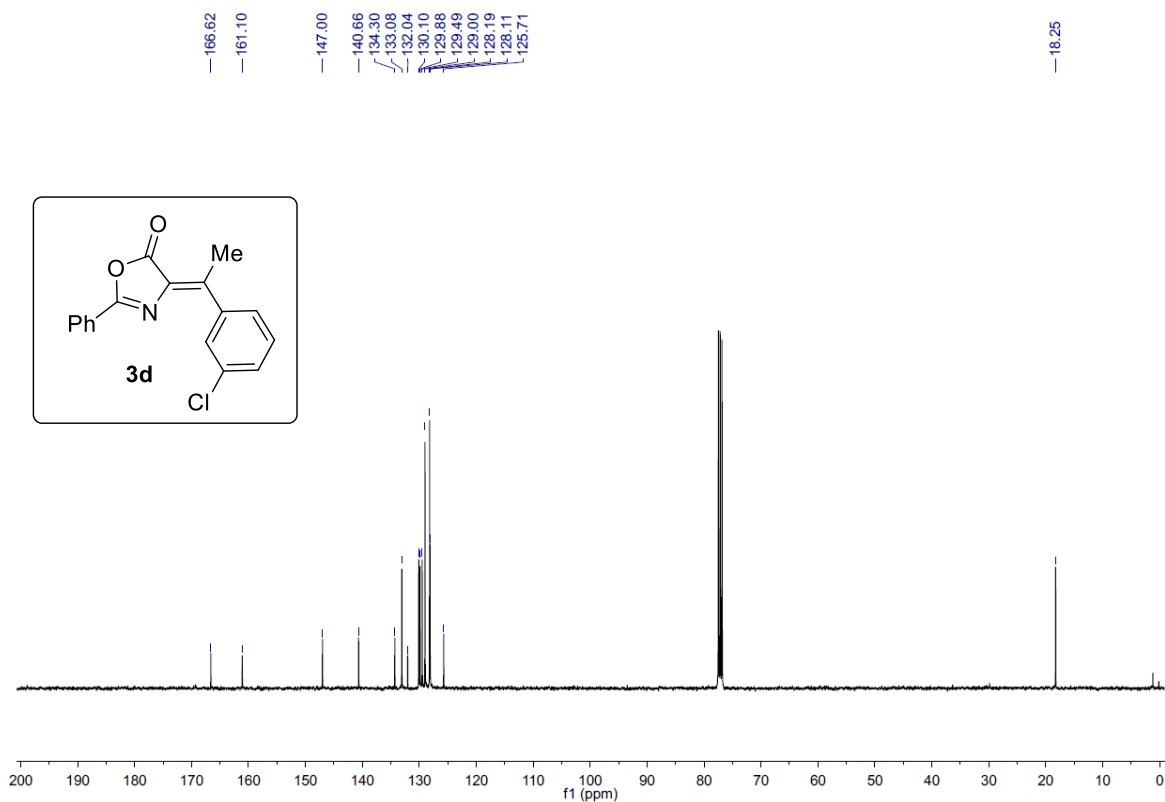

400 MHz <sup>1</sup>H NMR and 100 MHz <sup>13</sup>C NMR spectra of compound **3d** in CDCl<sub>3</sub>

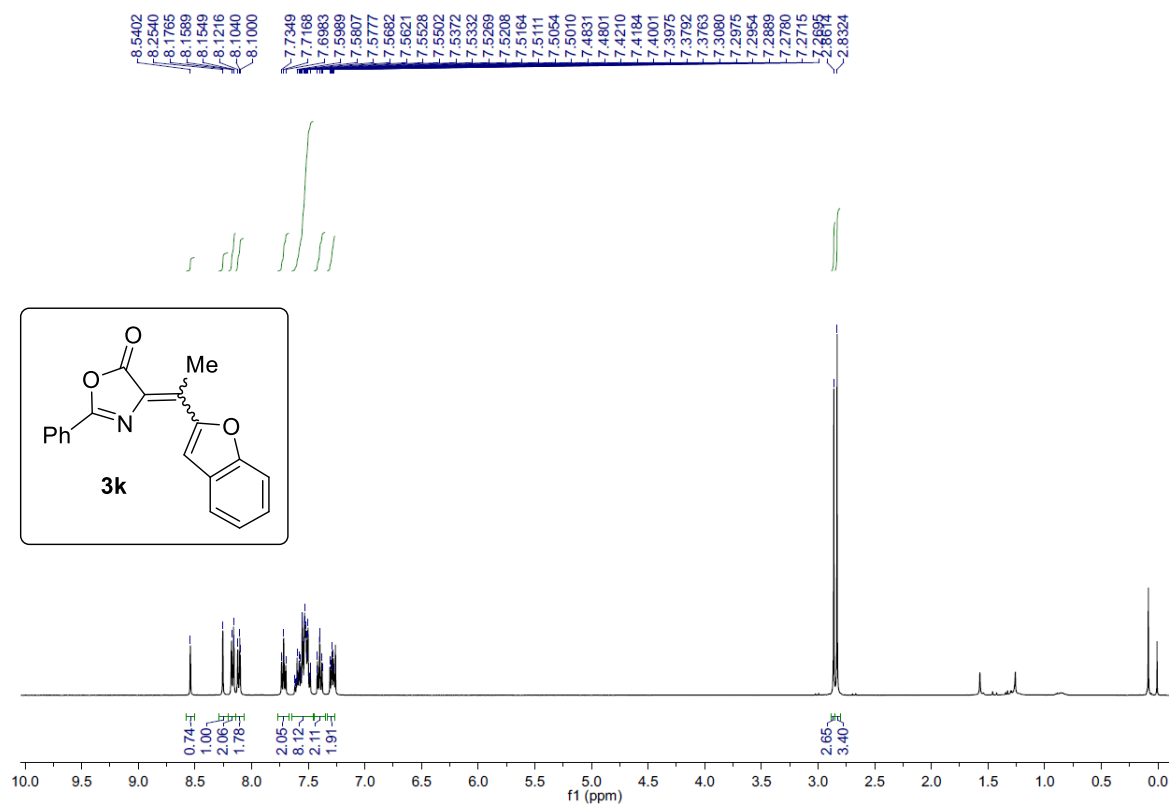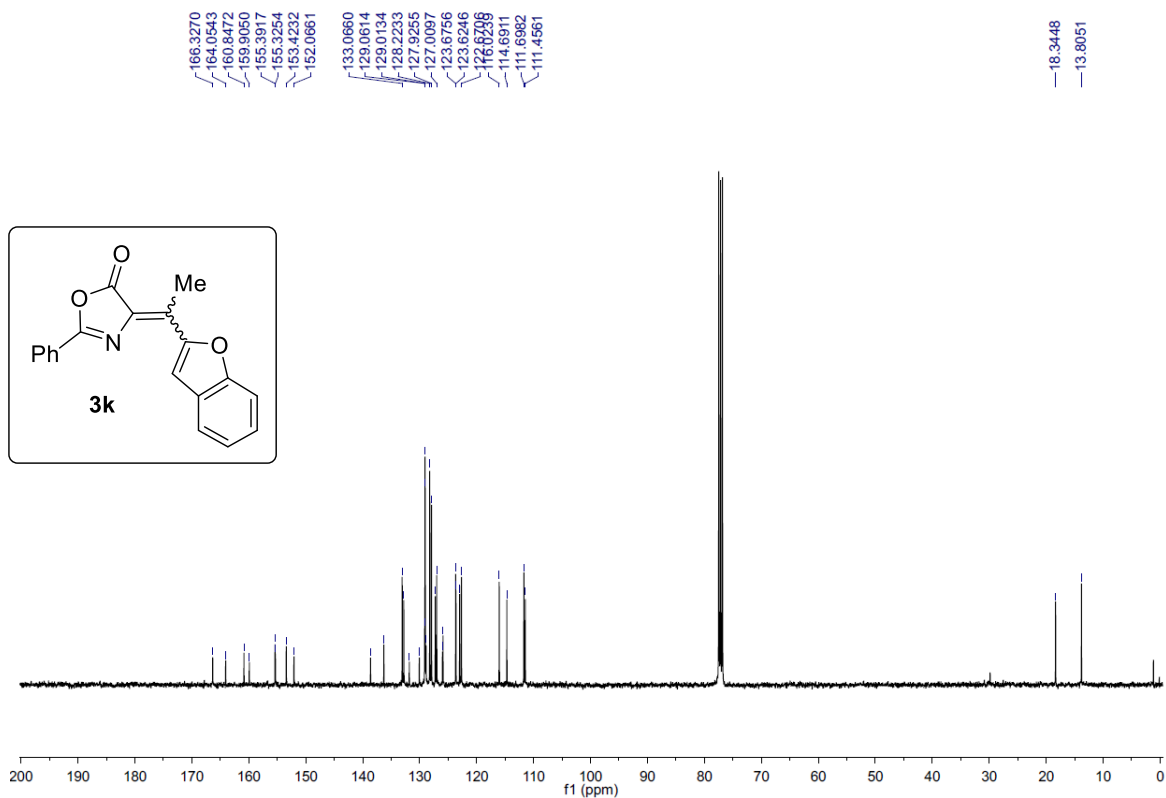

400 MHz <sup>1</sup>H NMR and 100 MHz <sup>13</sup>C NMR spectra of compound **3k**, *E/Z* (1:1.3), in CDCl<sub>3</sub>

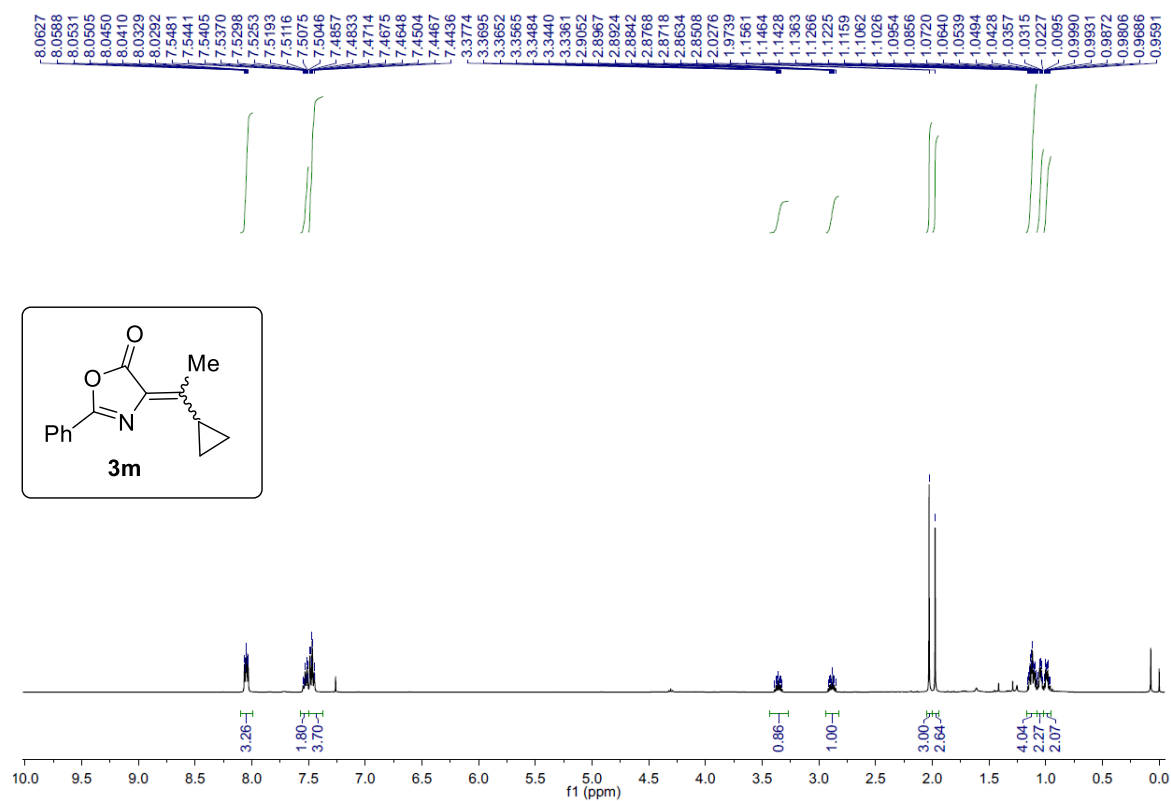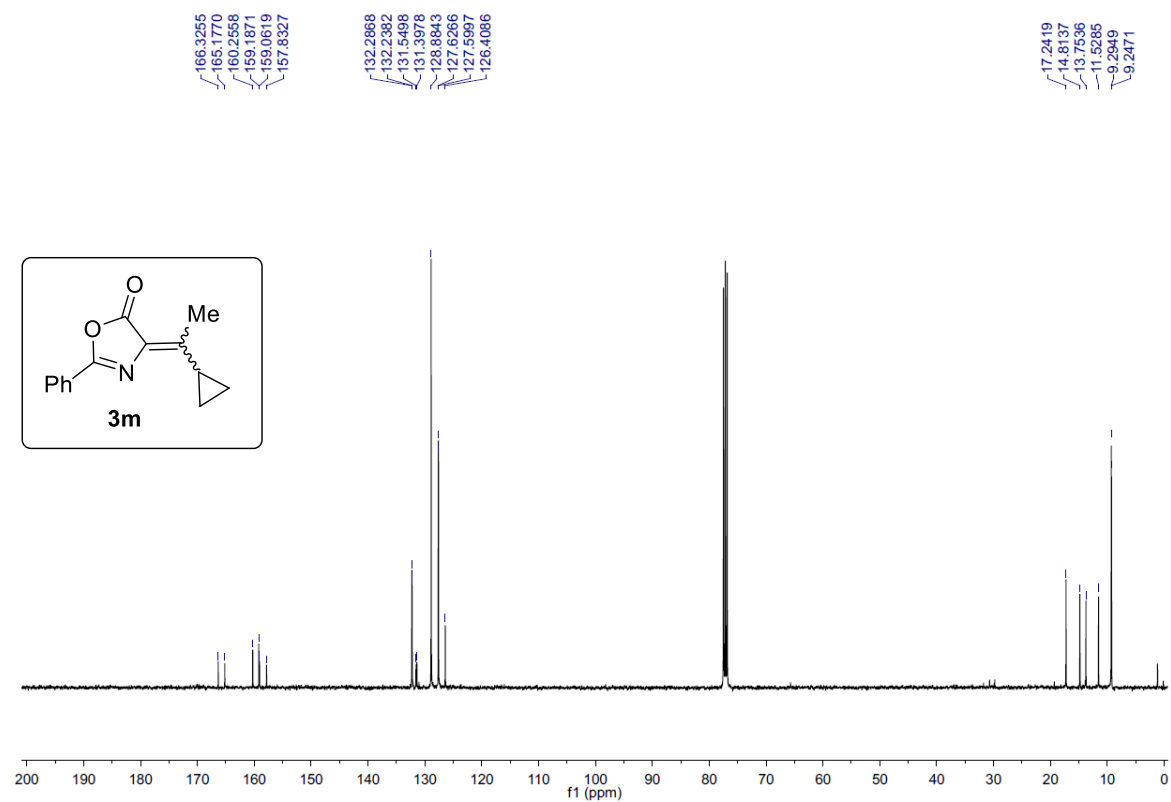

400 MHz <sup>1</sup>H NMR and 100 MHz <sup>13</sup>C NMR spectra of compound **3m**, *E/Z* (1:1.1), in CDCl<sub>3</sub>



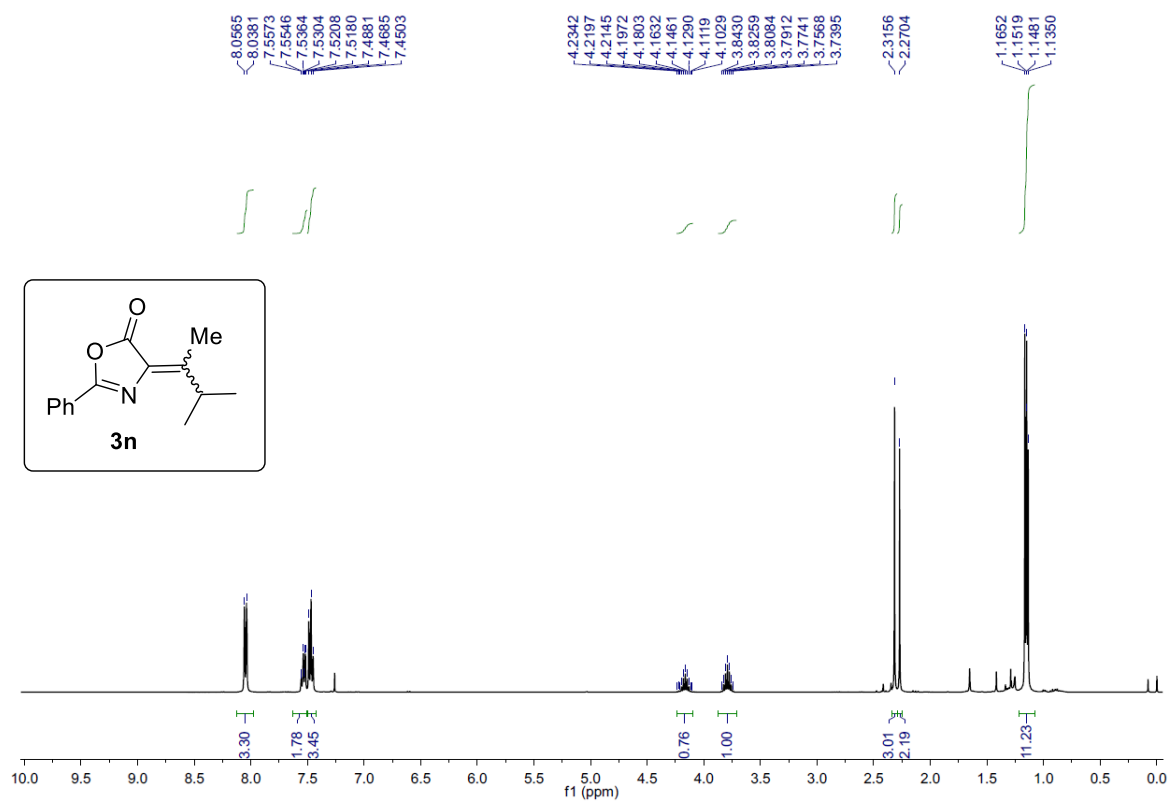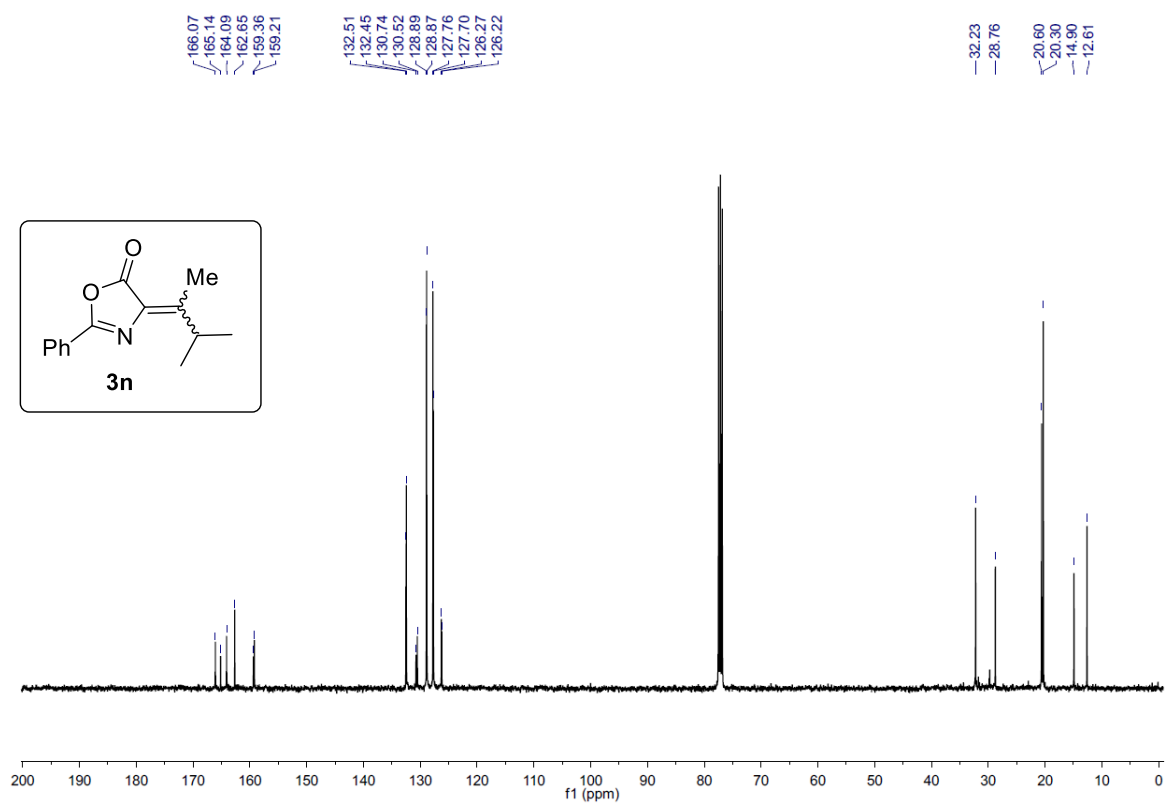

400 MHz <sup>1</sup>H NMR and 100 MHz <sup>13</sup>C NMR spectra of compound **3n**, *E/Z* (1:1.3), in CDCl<sub>3</sub>

NMR spectra of HDA adducts (4), transformation products (5) and (6)

(i) (*R*)-*N*-(2-oxo-4,6-diphenyl-6-(trifluoromethyl)-5,6-dihydro-2*H*-pyran-3-yl)benzamide (4aa)

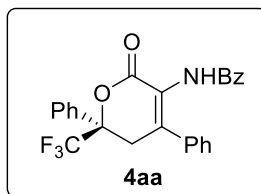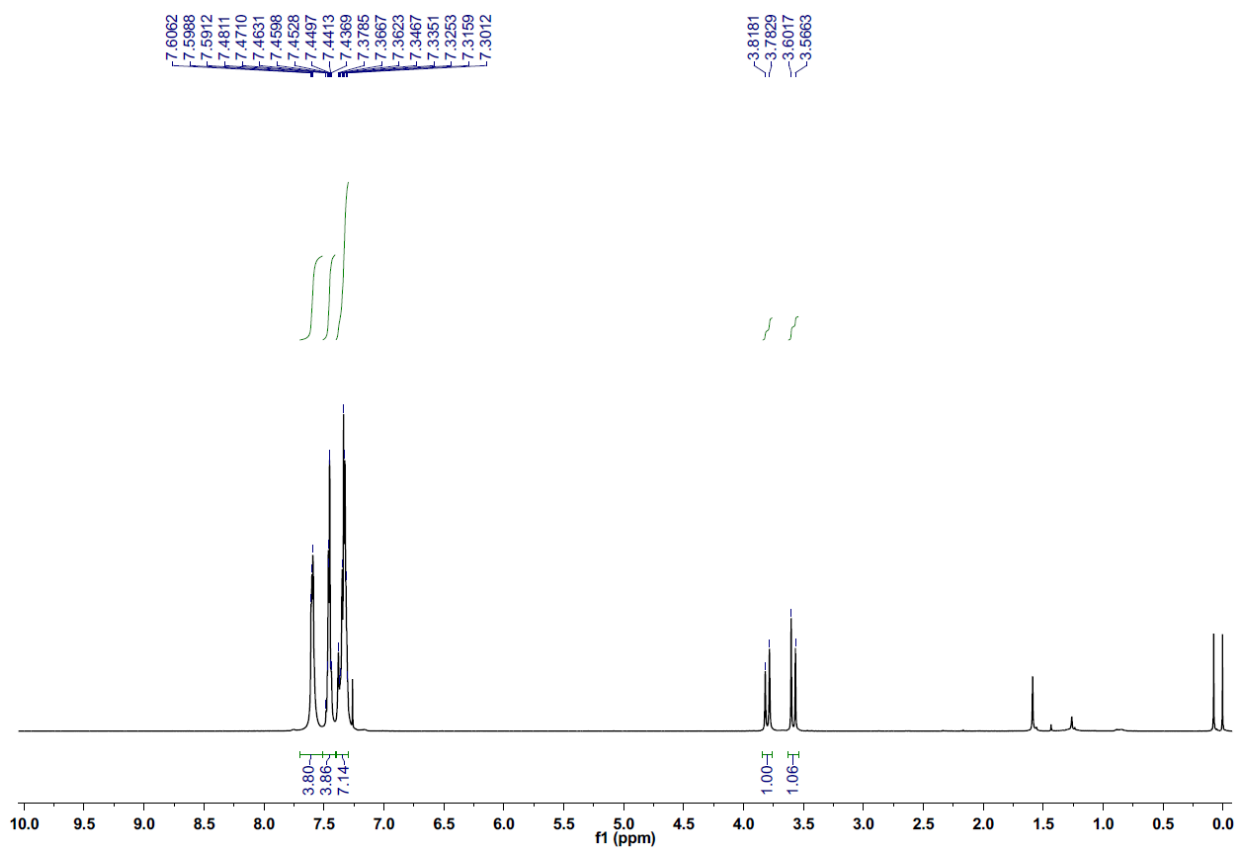

500 MHz  $^1\text{H}$  NMR spectrum of compound **4aa** in  $\text{CDCl}_3$

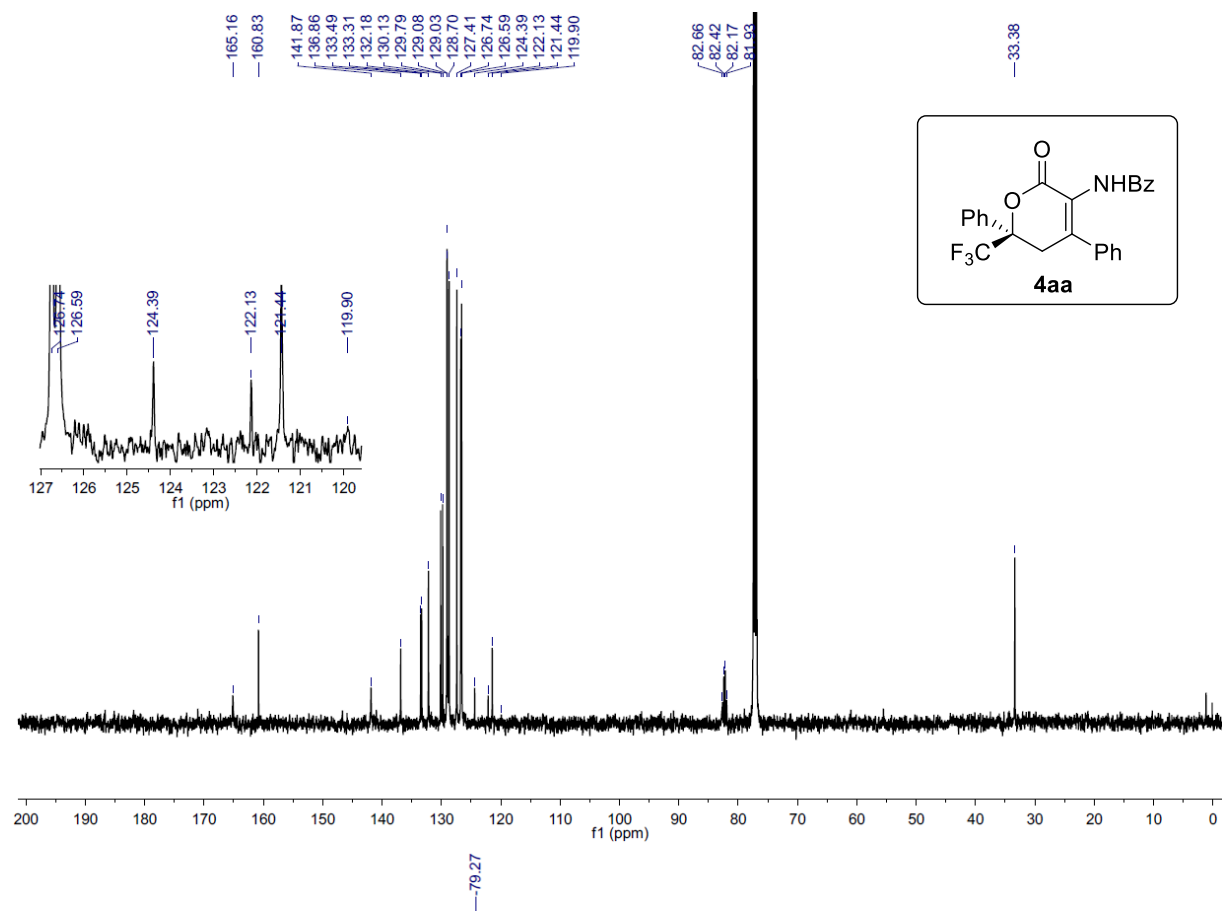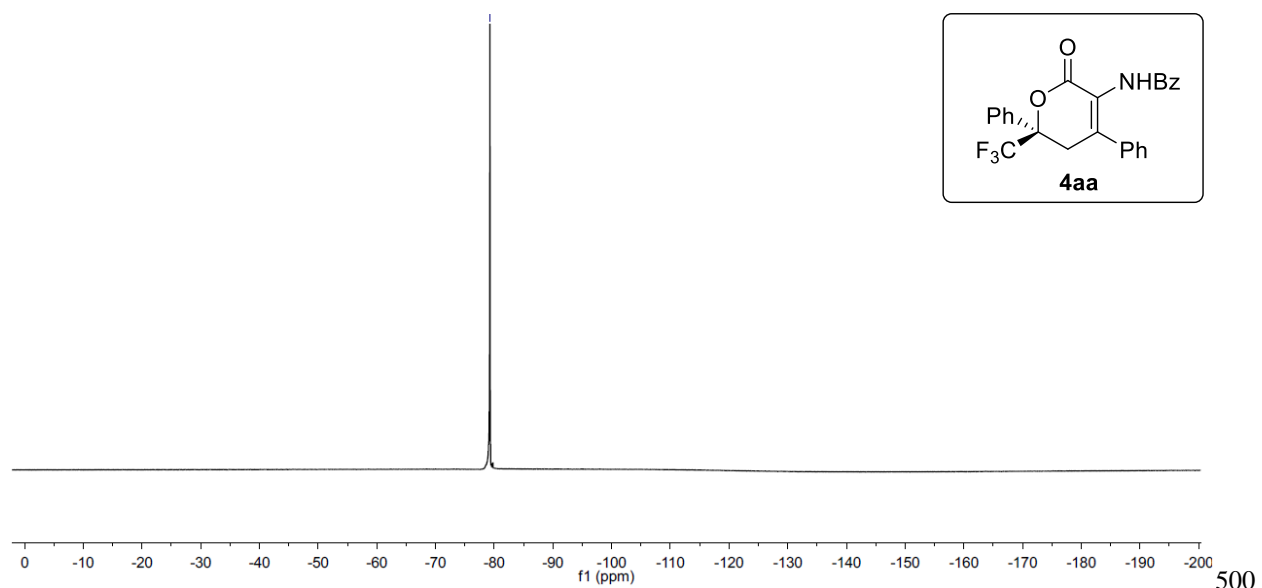

125 MHz  $^{13}\text{C}$  NMR and 373 MHz  $^{19}\text{F}$  NMR spectra of compound **4aa** in  $\text{CDCl}_3$

- (ii) **(*R*)-*N*-(4-(3-bromophenyl)-2-oxo-6-phenyl-6-(trifluoromethyl)-5,6-dihydro-2*H*-pyran-3-yl)benzamide (**4ab**)**

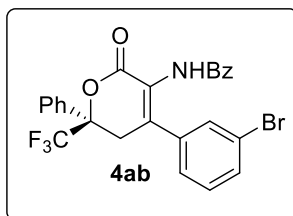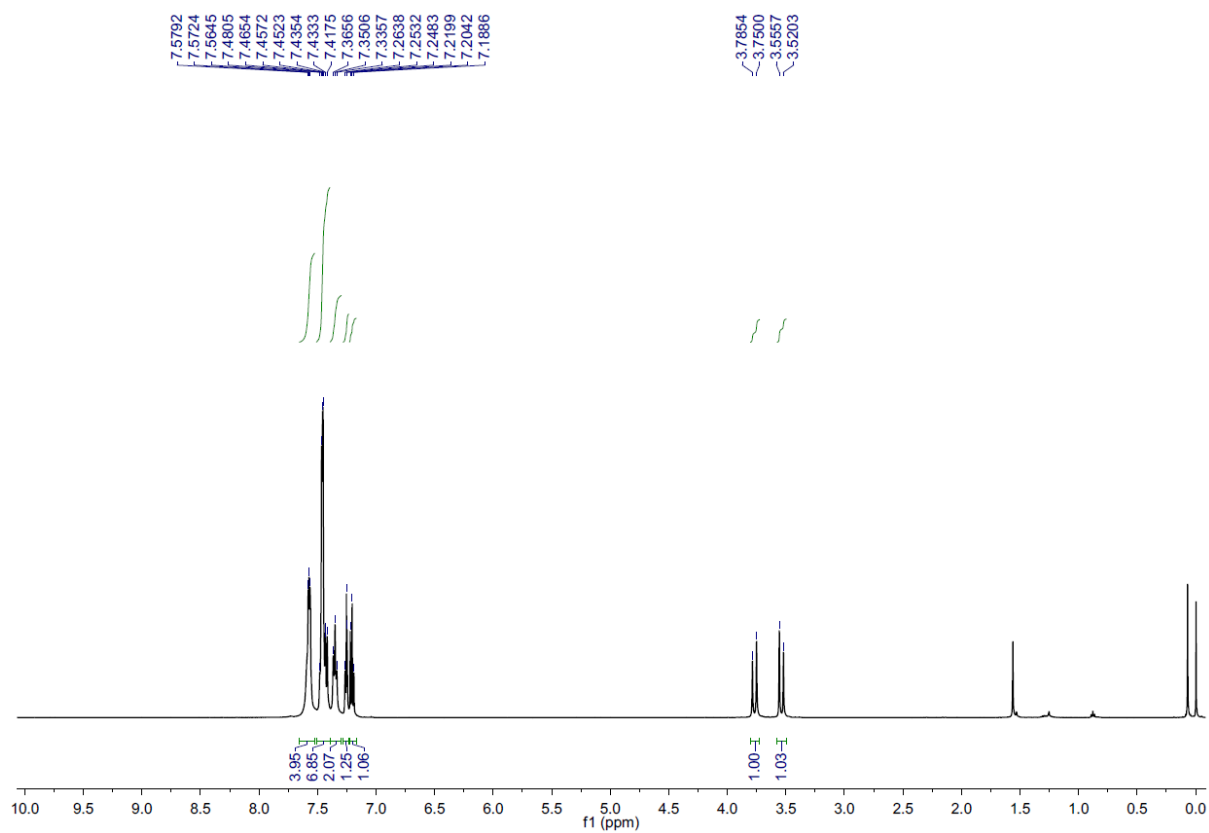

500 MHz  $^1\text{H}$  NMR spectrum of compound **4ab** in  $\text{CDCl}_3$

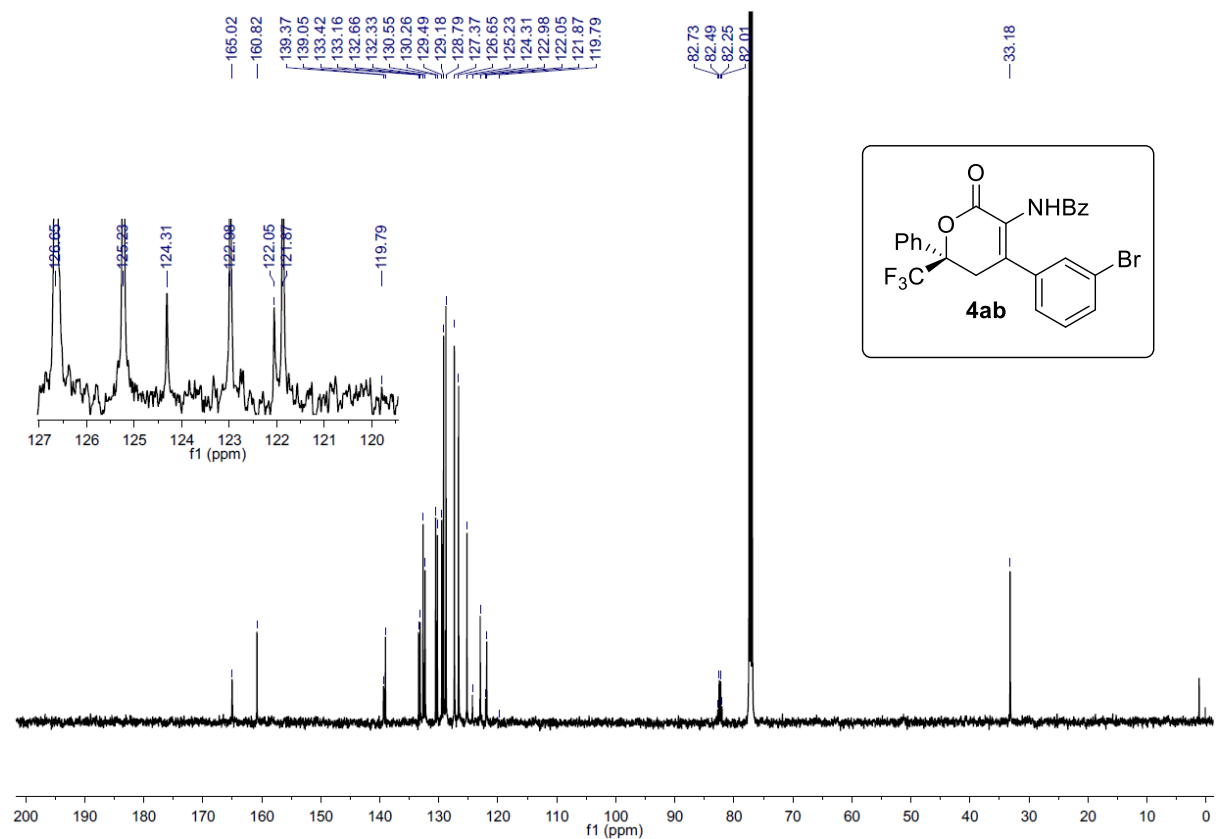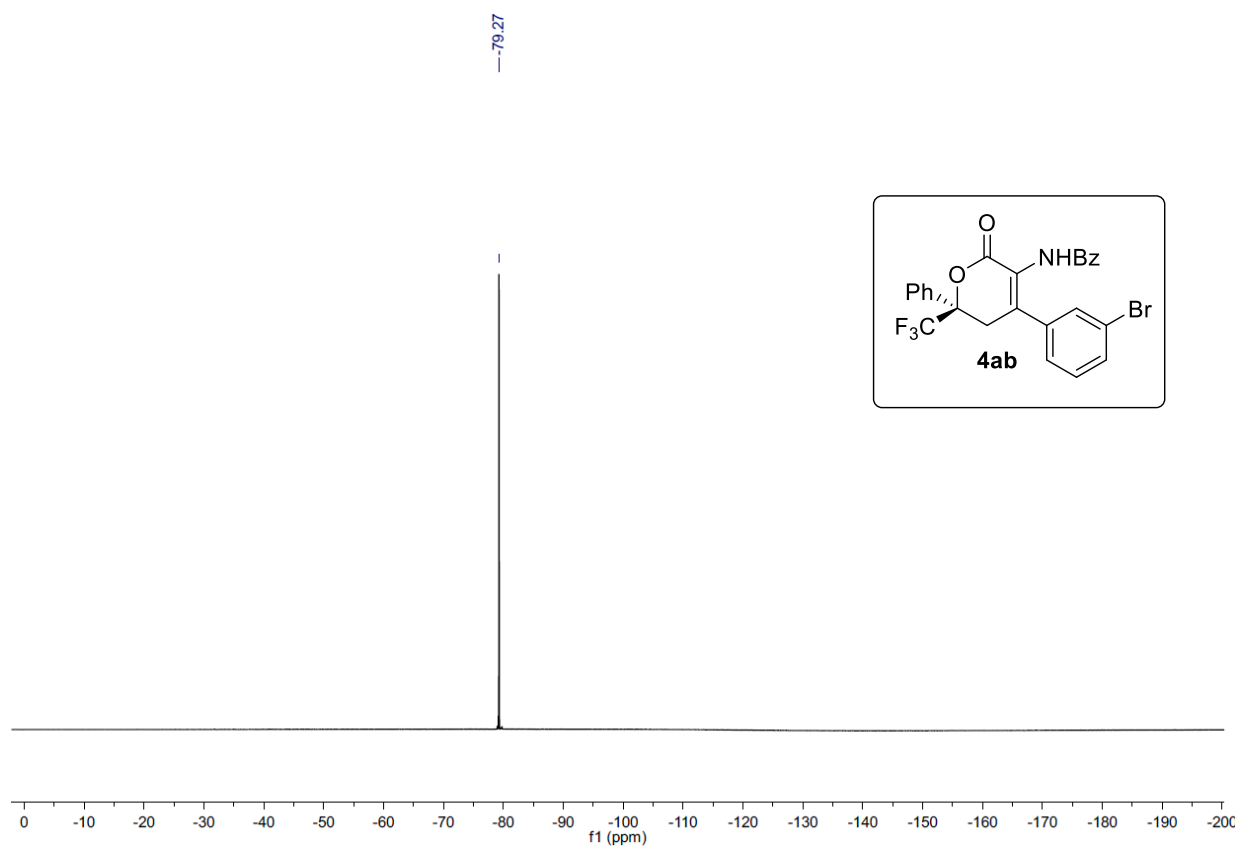

125 MHz <sup>13</sup>C NMR and 373 MHz <sup>19</sup>F NMR spectra of compound **4ab** in CDCl<sub>3</sub>

- (iii) **(*R*)-*N*-(4-(4-bromophenyl)-2-oxo-6-phenyl-6-(trifluoromethyl)-5,6-dihydro-2*H*-pyran-3-yl)benzamide (4ac)**

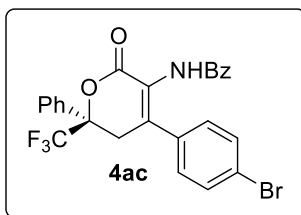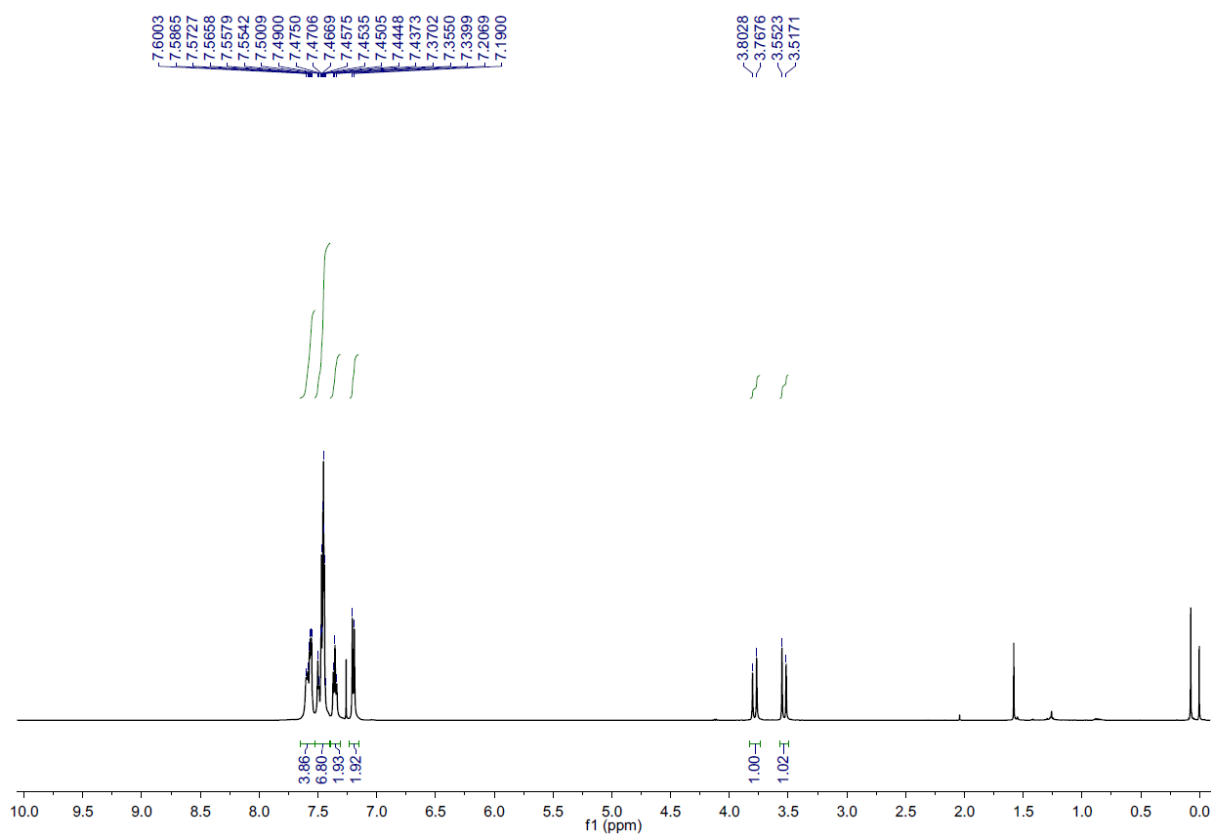

500 MHz  $^1\text{H}$  NMR spectrum of compound **4ac** in  $\text{CDCl}_3$

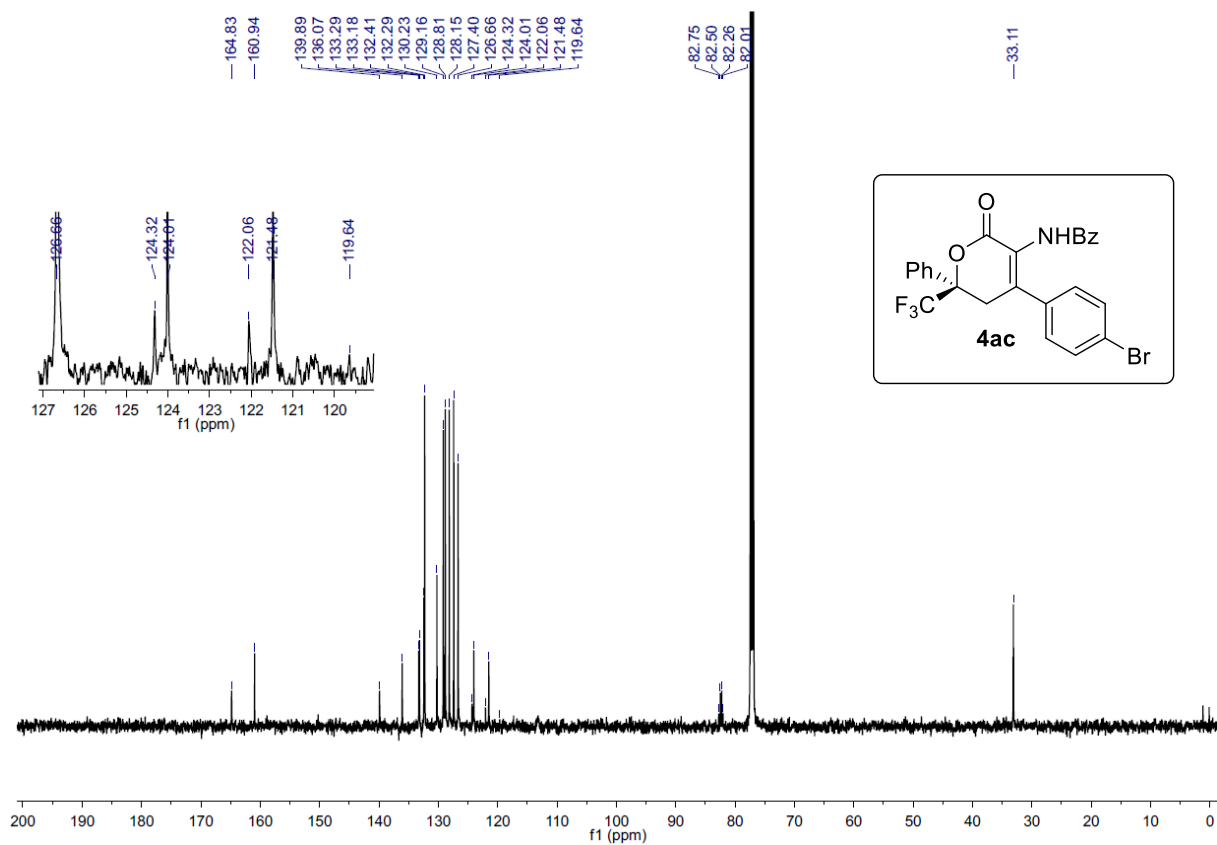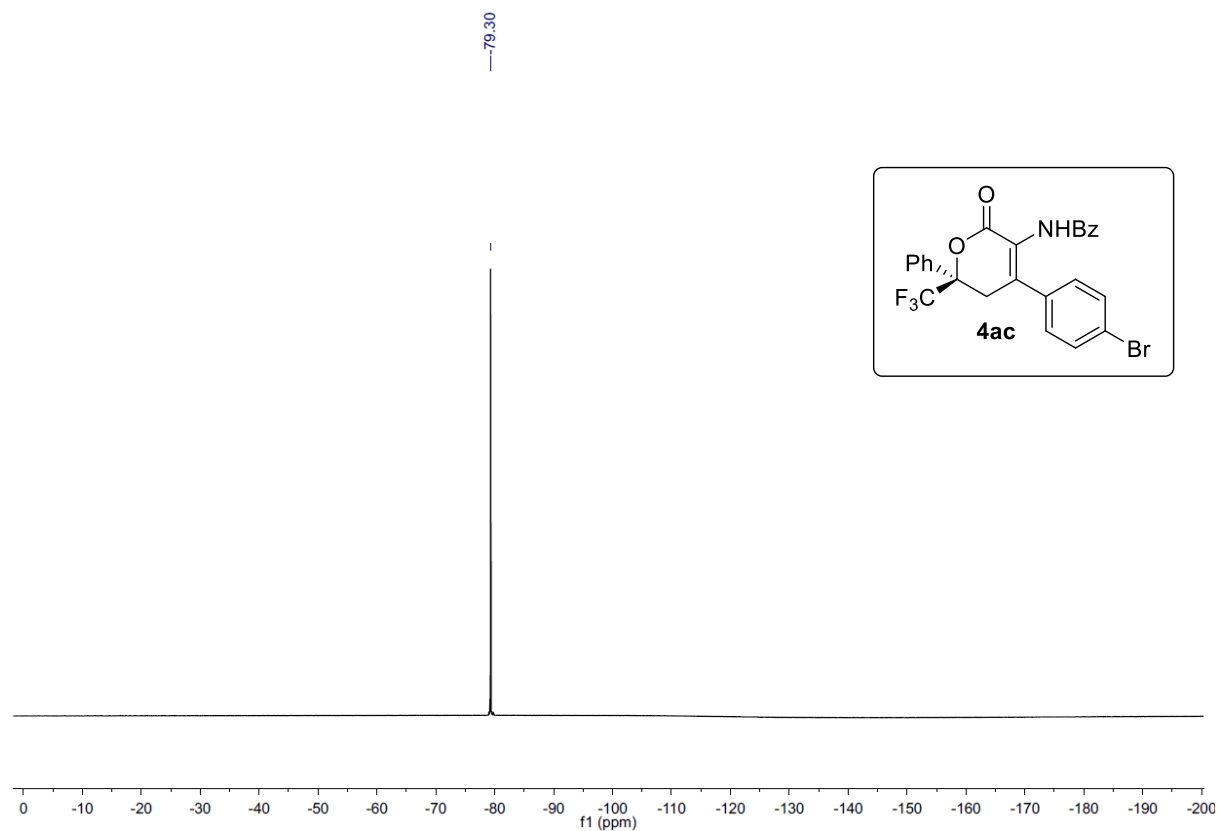

125 MHz  $^{13}\text{C}$  NMR and 373 MHz  $^{19}\text{F}$  NMR spectra of compound **4ac** in  $\text{CDCl}_3$

- (iv) **(*R*)-*N*-(4-(3-chlorophenyl)-2-oxo-6-phenyl-6-(trifluoromethyl)-5,6-dihydro-2*H*-pyran-3-yl)benzamide (4ad)**

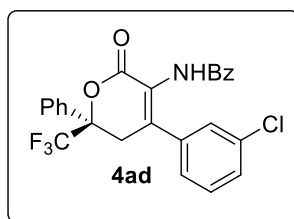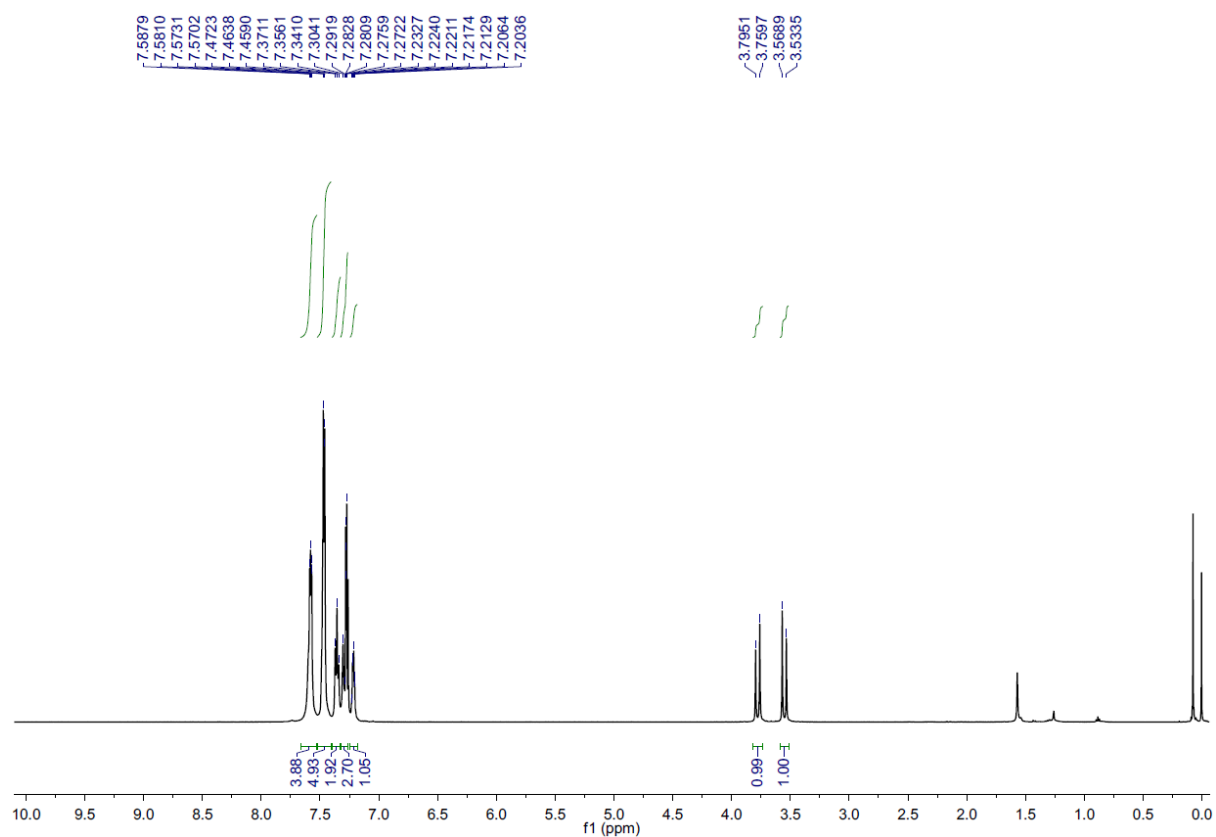

500 MHz  $^1\text{H}$  NMR spectrum of compound **4ad** in  $\text{CDCl}_3$



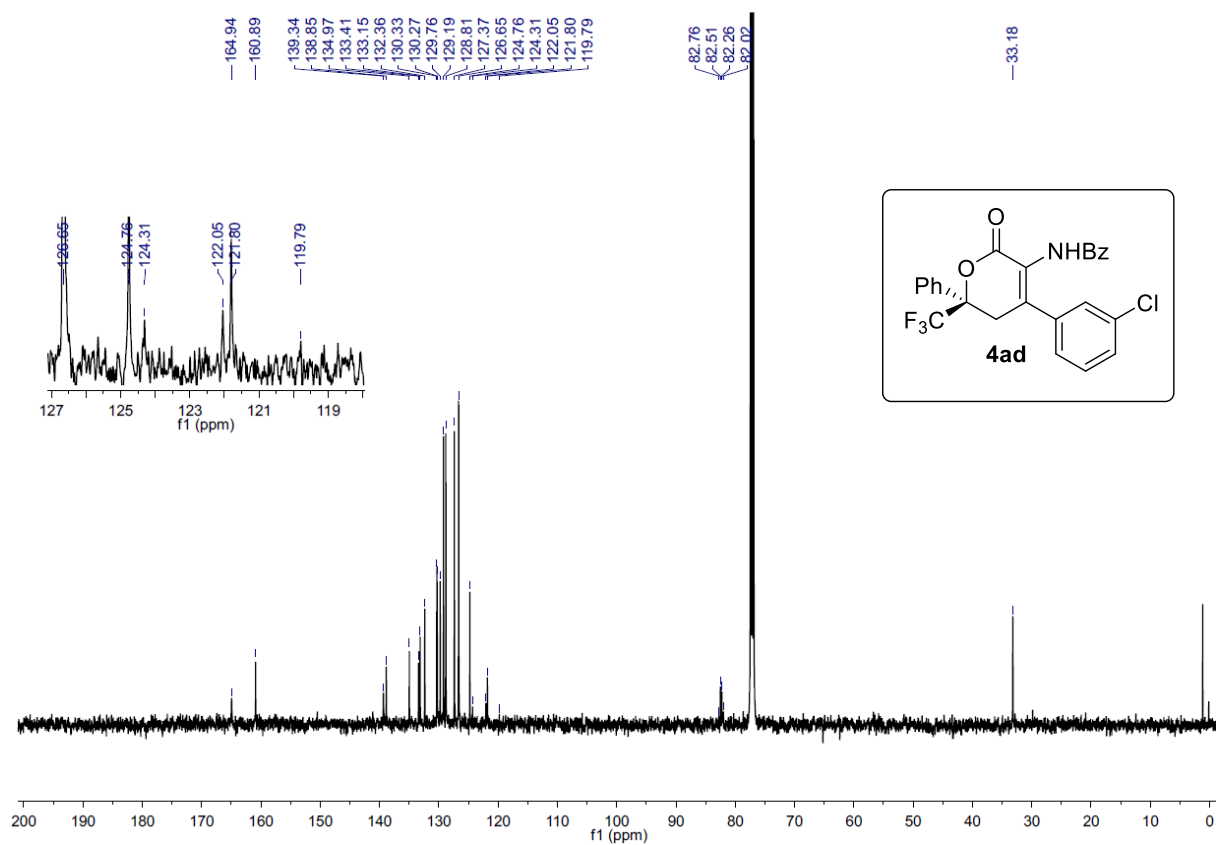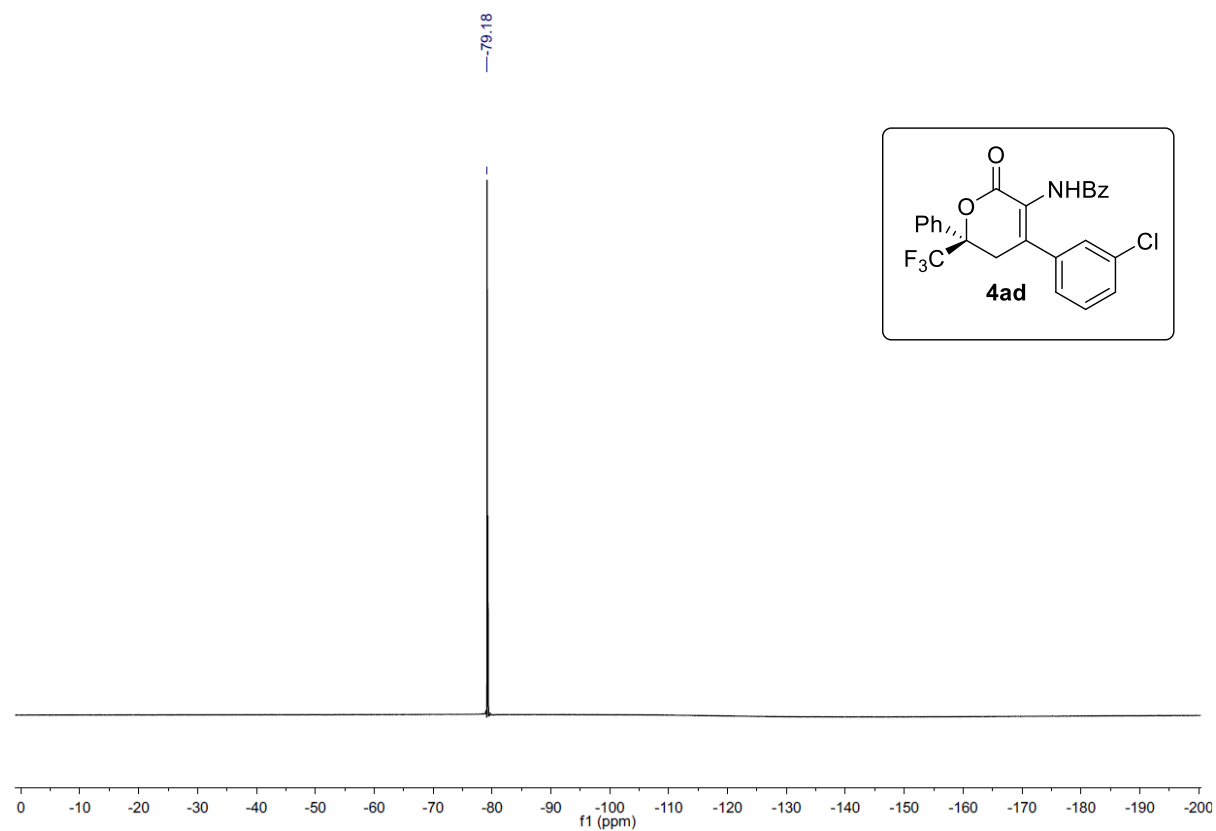

125 MHz <sup>13</sup>C NMR and 373 MHz <sup>19</sup>F NMR spectra of compound **4ad** in CDCl<sub>3</sub>

- (v) (*R*)-*N*-(4-(4-chlorophenyl)-2-oxo-6-phenyl-6-(trifluoromethyl)-5,6-dihydro-2*H*-pyran-3-yl)benzamide (**4ae**)

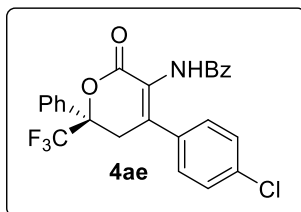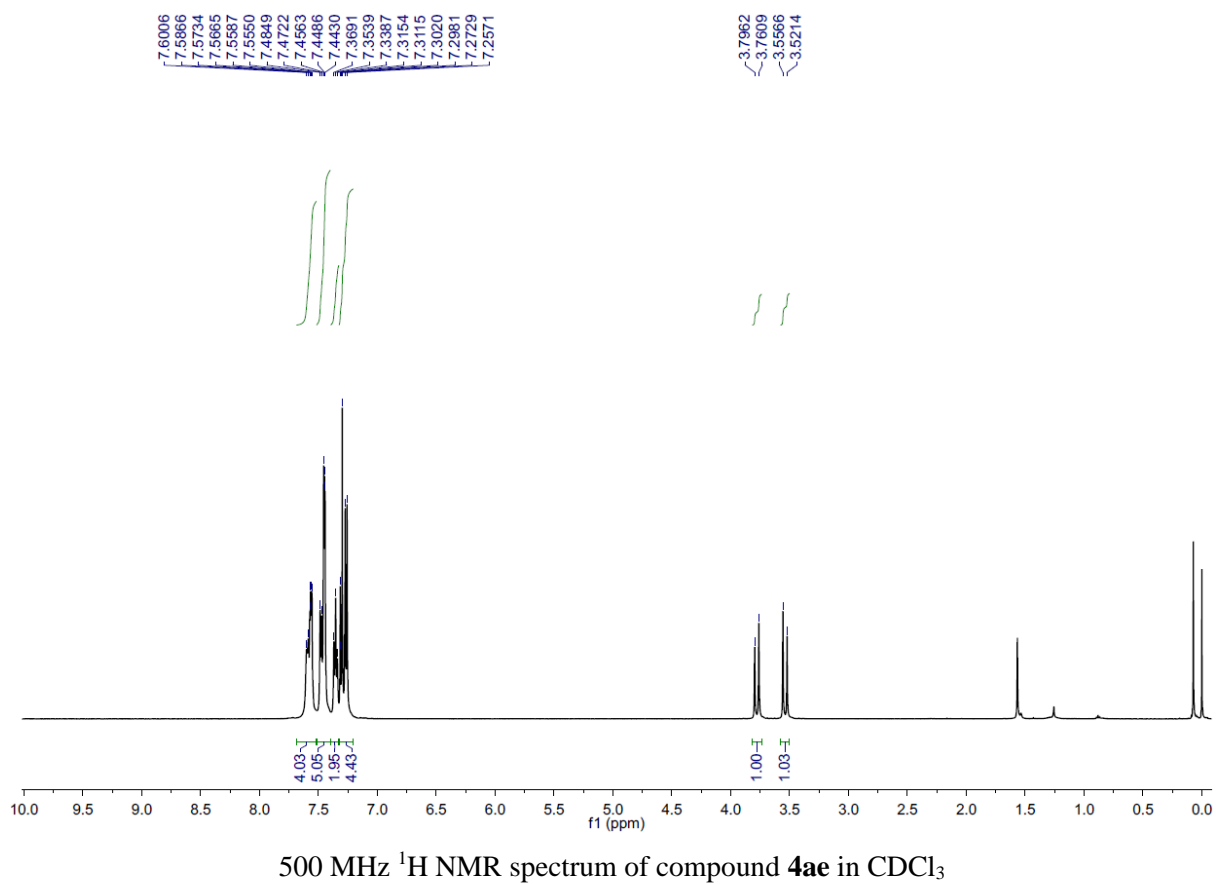

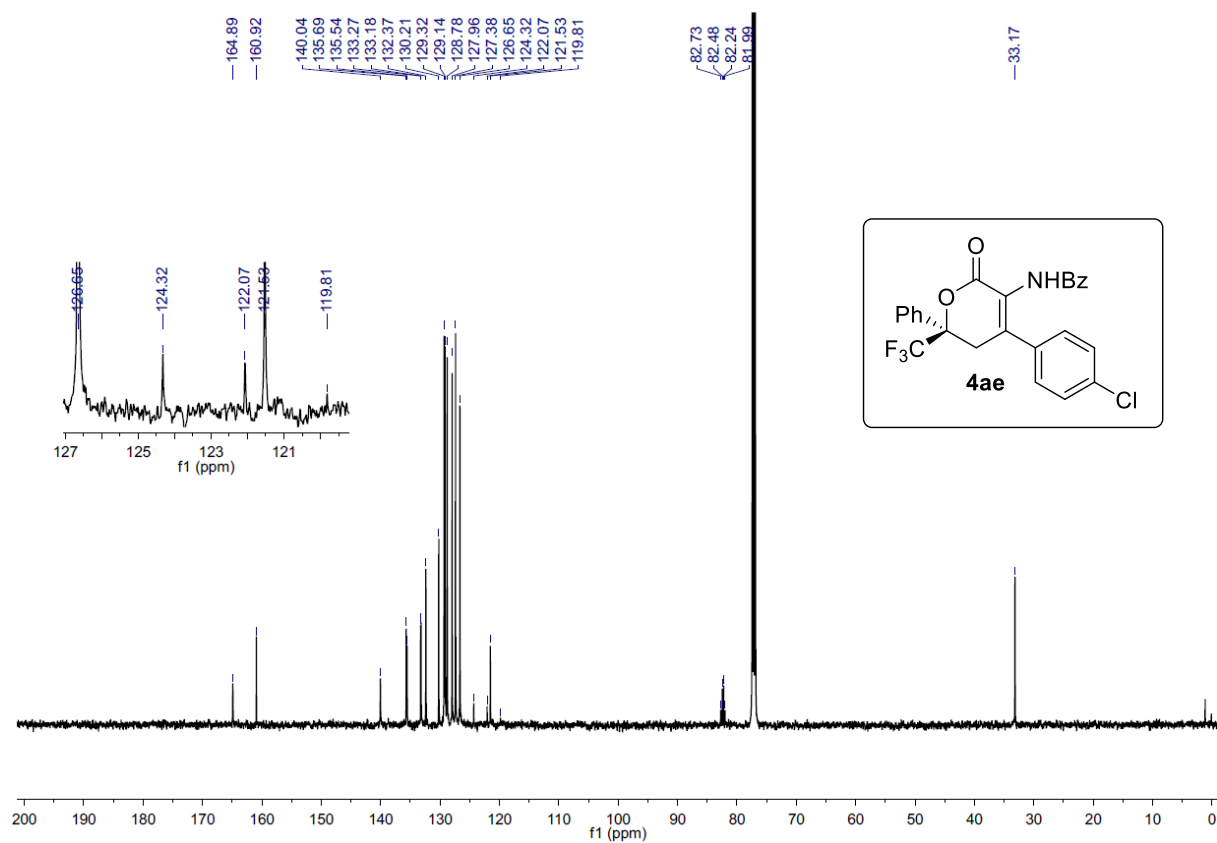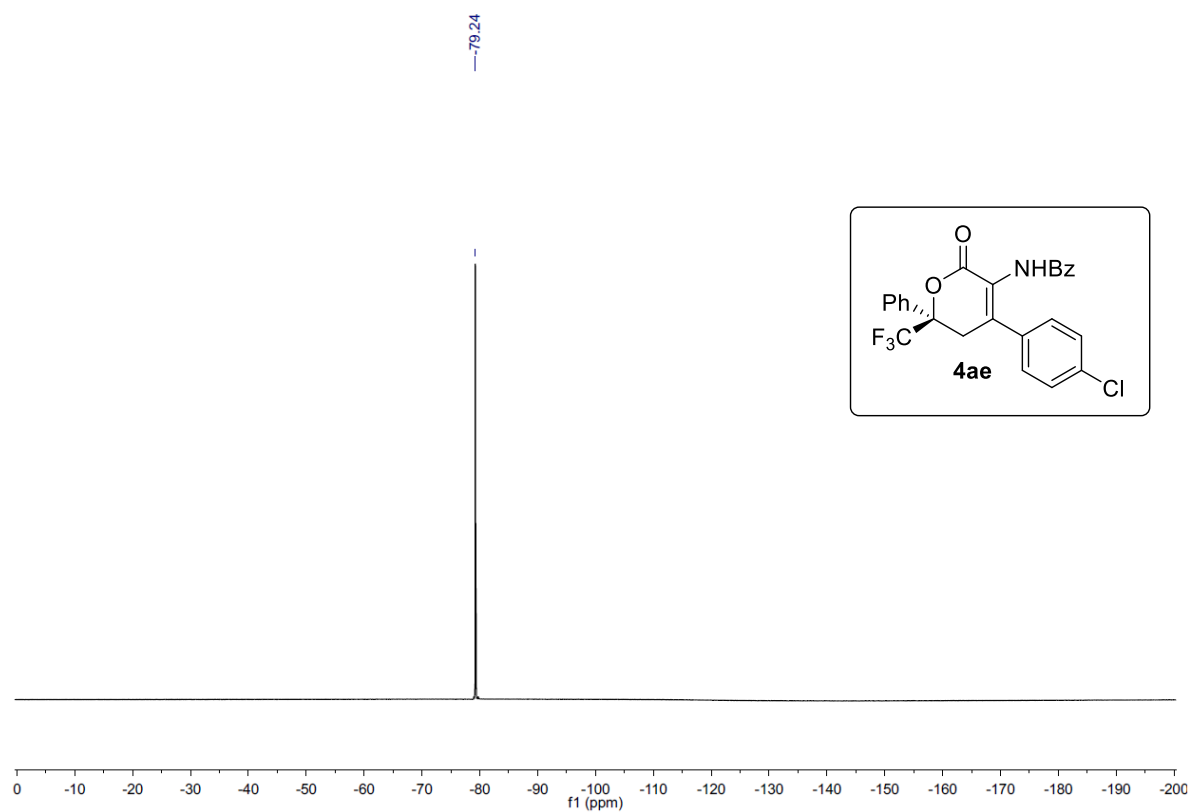

125 MHz  $^{13}\text{C}$  NMR and 373 MHz  $^{19}\text{F}$  NMR spectra of compound **4ae** in  $\text{CDCl}_3$

(vi) **(*R*)-*N*-(4-(4-fluorophenyl)-2-oxo-6-phenyl-6-(trifluoromethyl)-5,6-dihydro-2*H*-pyran-3-yl)benzamide (**4af**)**

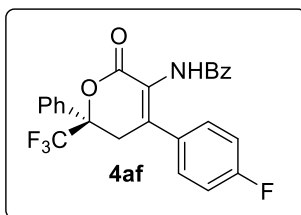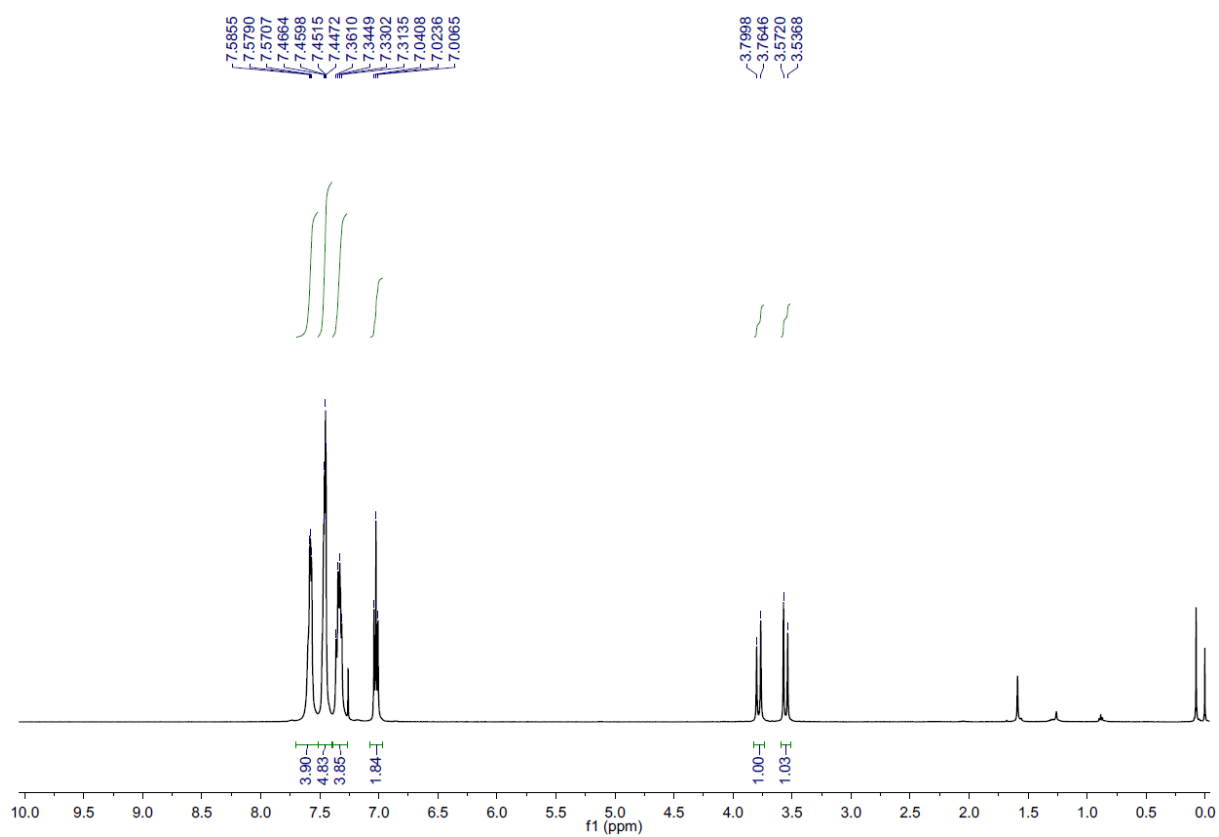

500 MHz  $^1\text{H}$  NMR spectrum of compound **4af** in  $\text{CDCl}_3$

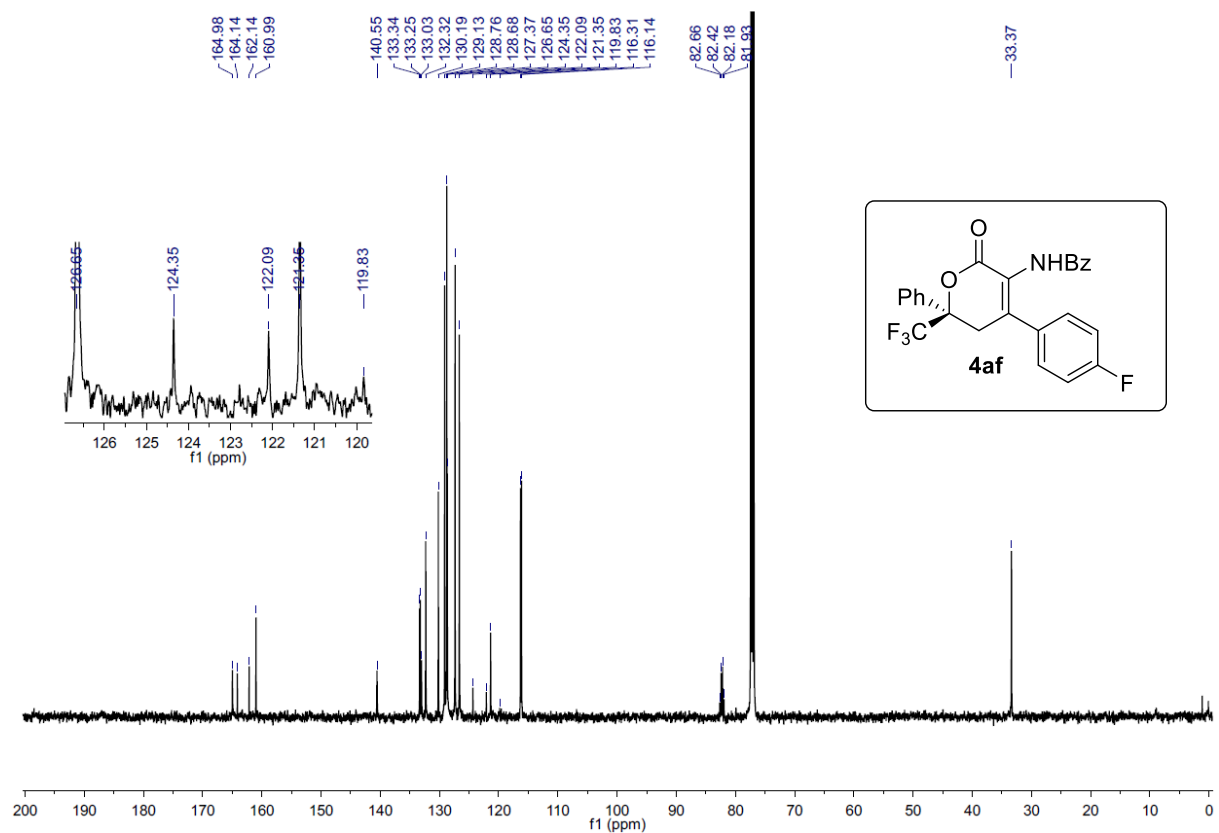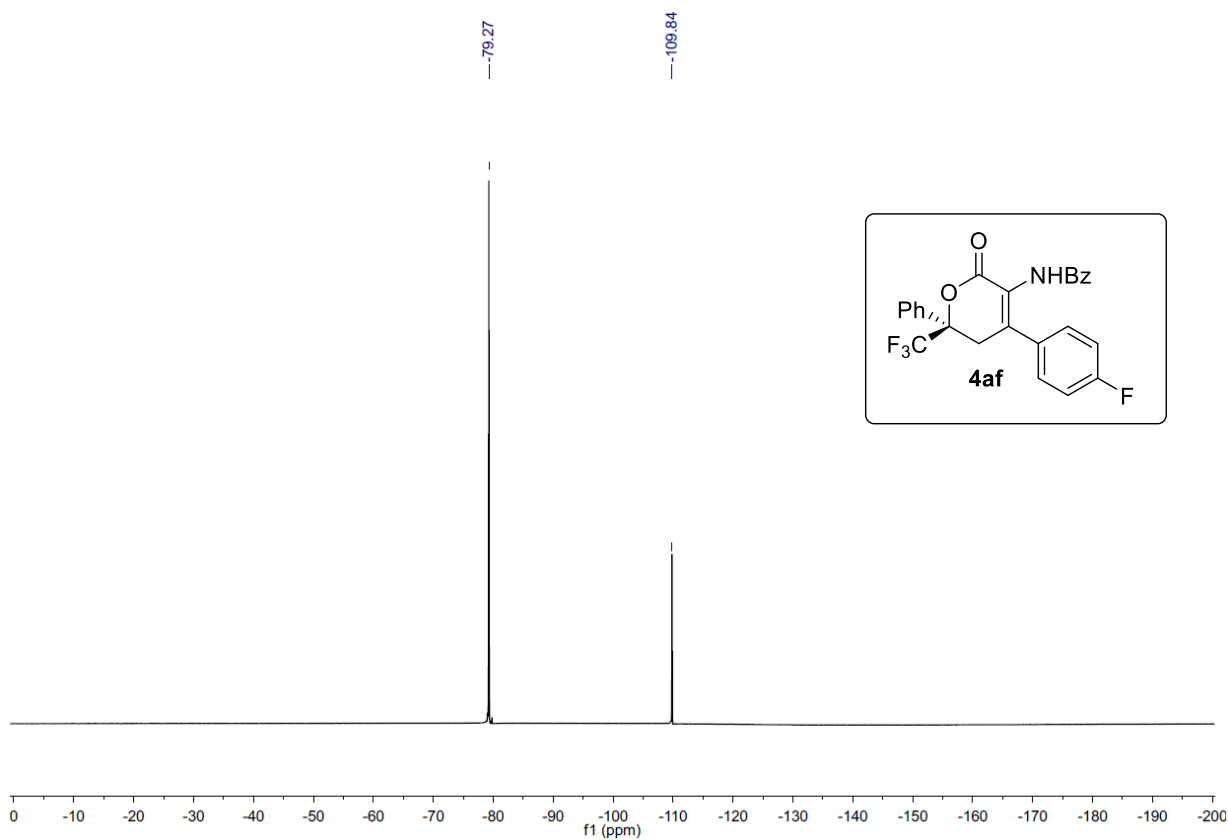

125 MHz  $^{13}\text{C}$  NMR and 373 MHz  $^{19}\text{F}$  NMR spectra of compound **4af** in  $\text{CDCl}_3$

(vii) **(*R*)-*N*-(4-(4-nitrophenyl)-2-oxo-6-phenyl-6-(trifluoromethyl)-5,6-dihydro-2*H*-pyran-3-yl)benzamide (4ag)**

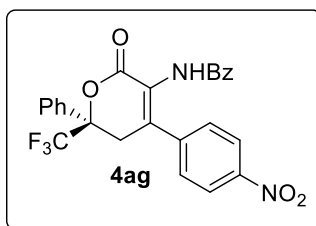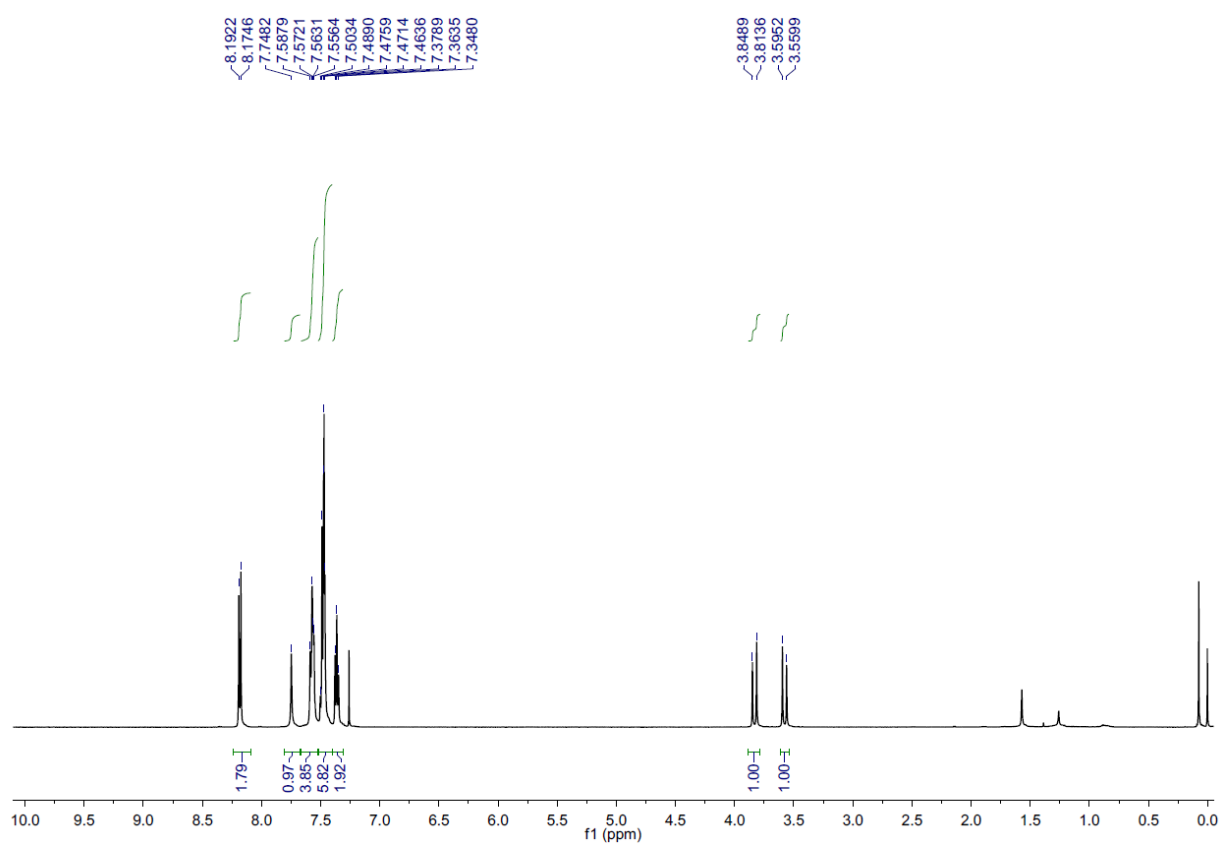

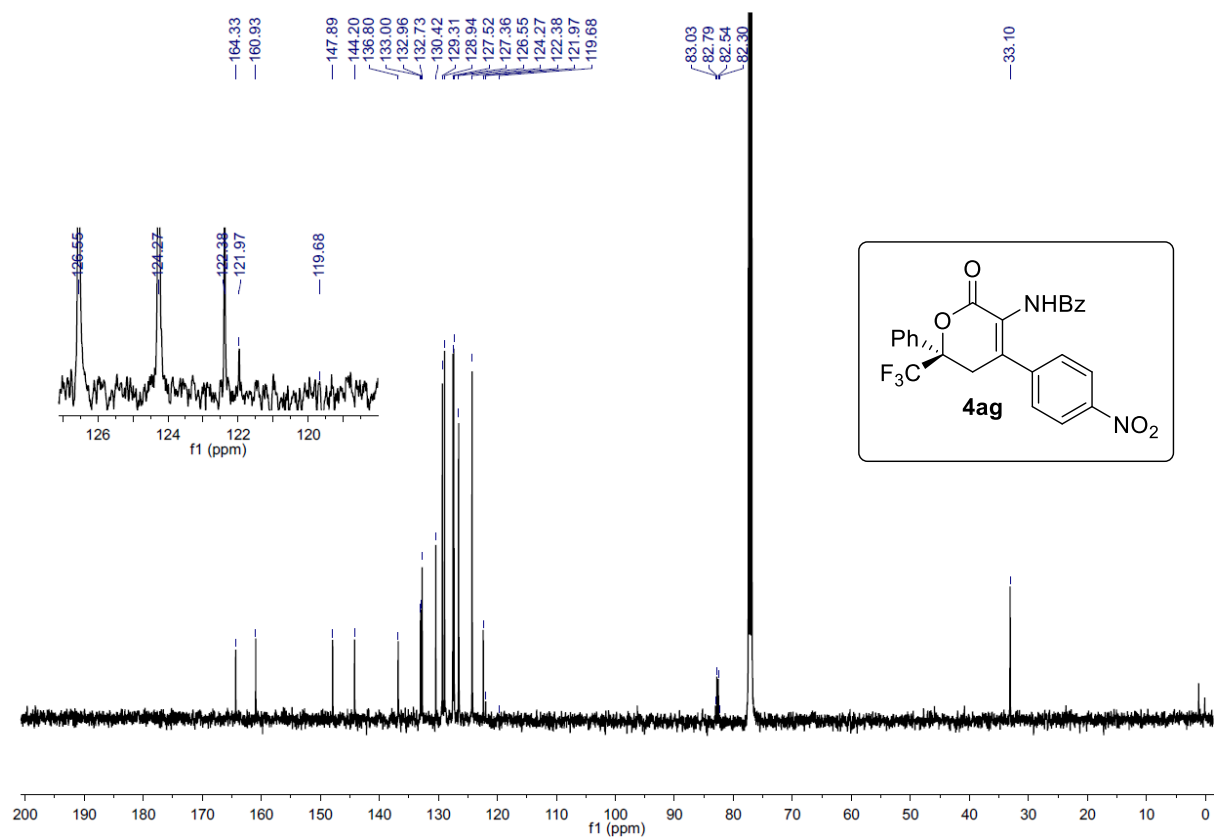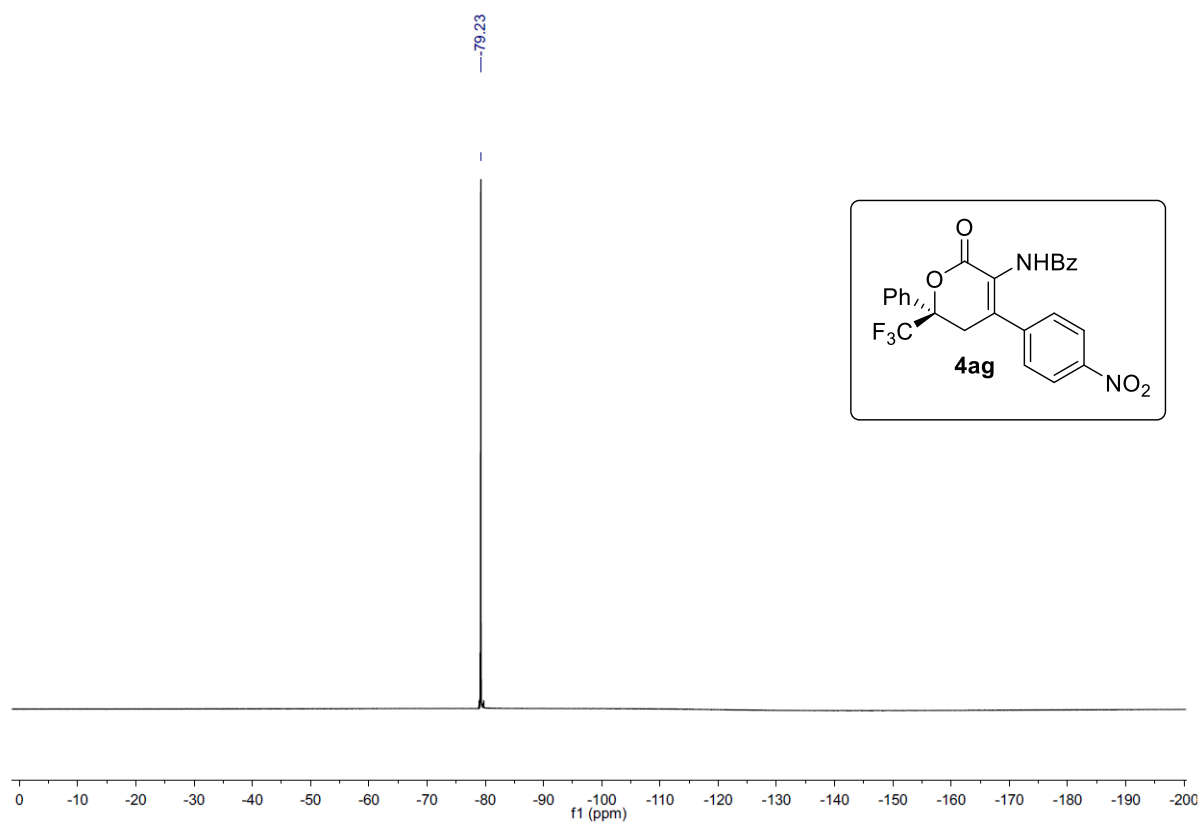

125 MHz <sup>13</sup>C NMR and 373 MHz <sup>19</sup>F NMR spectra of compound **4ag** in CDCl<sub>3</sub>

(viii) (*R*)-*N*-(2-oxo-6-phenyl-4-(*p*-tolyl)-6-(trifluoromethyl)-5,6-dihydro-2*H*-pyran-3-yl)benzamide (**4ah**)

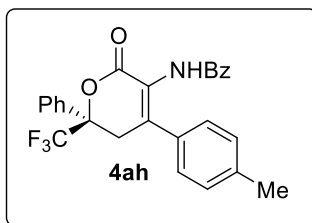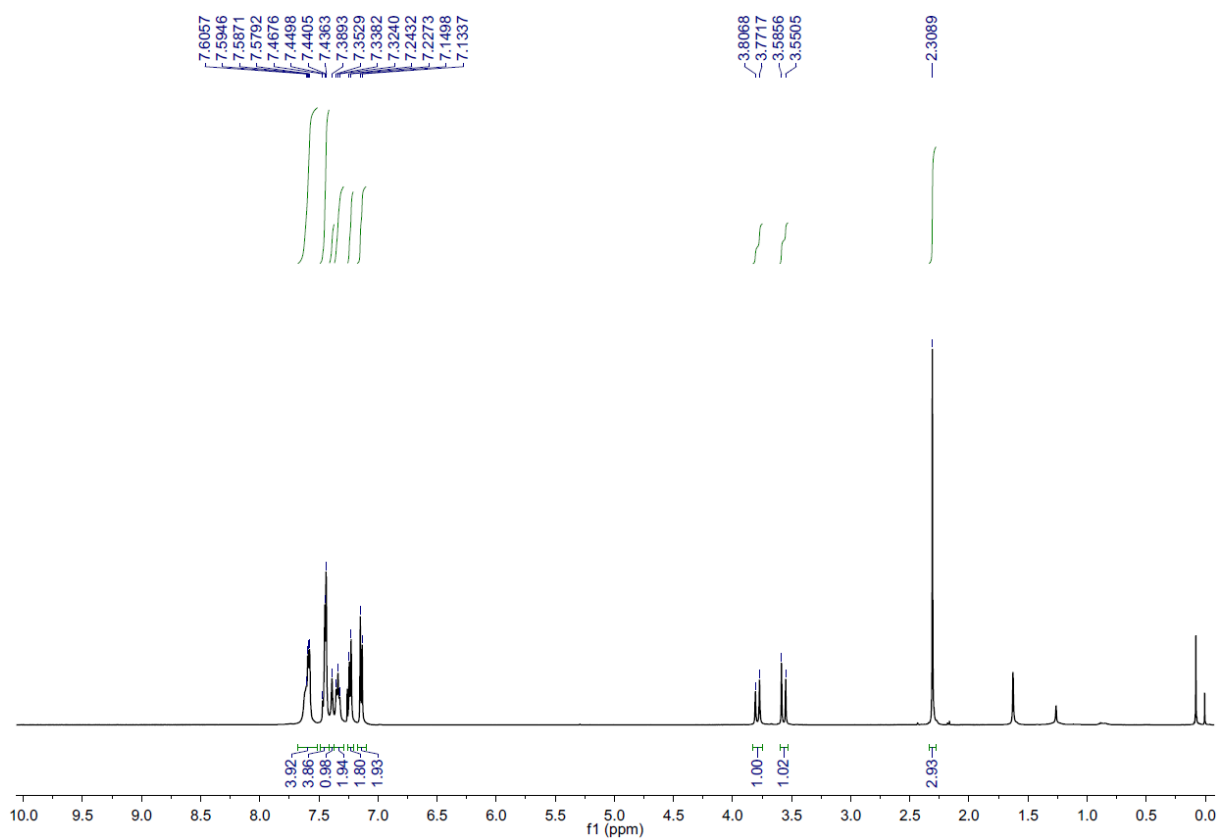

500 MHz  $^1\text{H}$  NMR spectrum of compound **4ah** in  $\text{CDCl}_3$



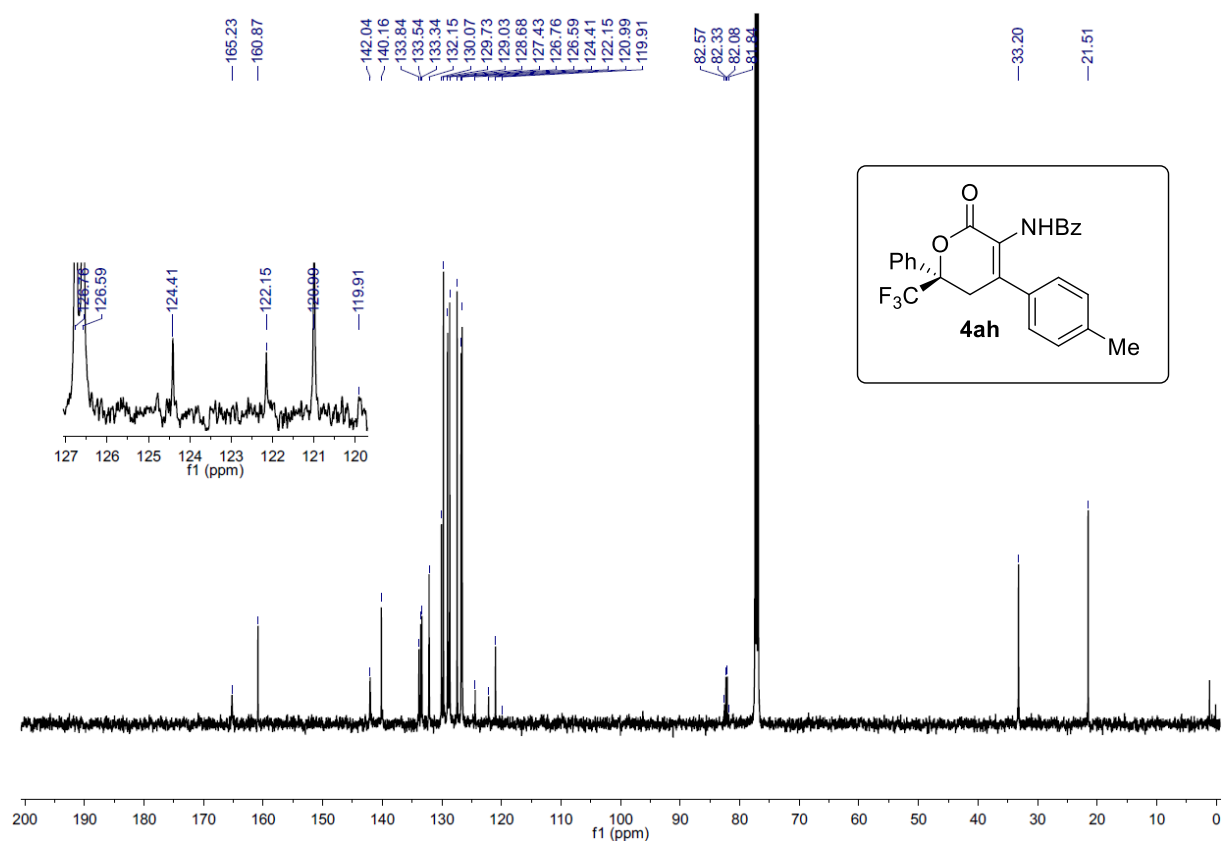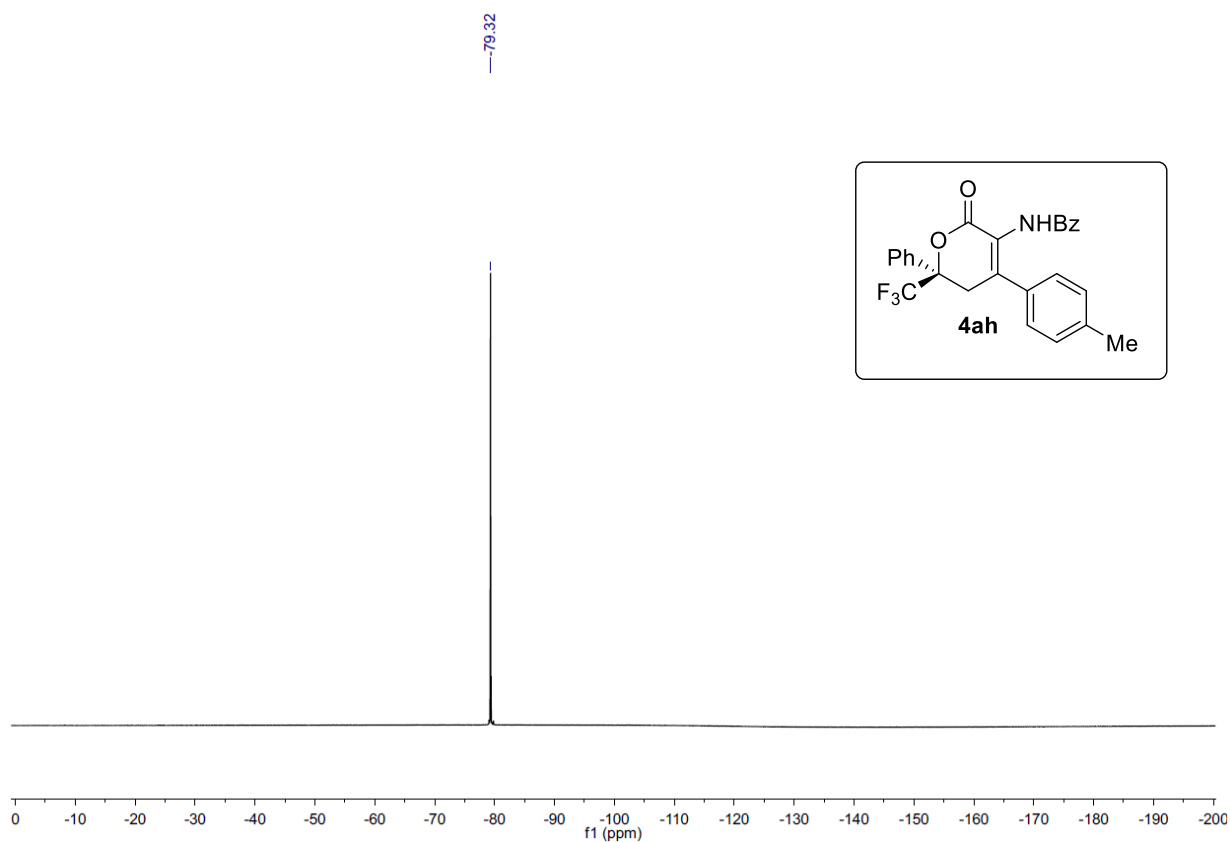

125 MHz  $^{13}\text{C}$  NMR and 373 MHz  $^{19}\text{F}$  NMR spectra of compound **4ah** in  $\text{CDCl}_3$

(ix) **(*R*)-*N*-(4-(4-methoxyphenyl)-2-oxo-6-phenyl-6-(trifluoromethyl)-5,6-dihydro-2*H*-pyran-3-yl)benzamide (**4ai**)**

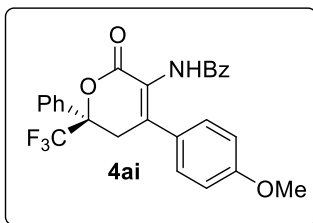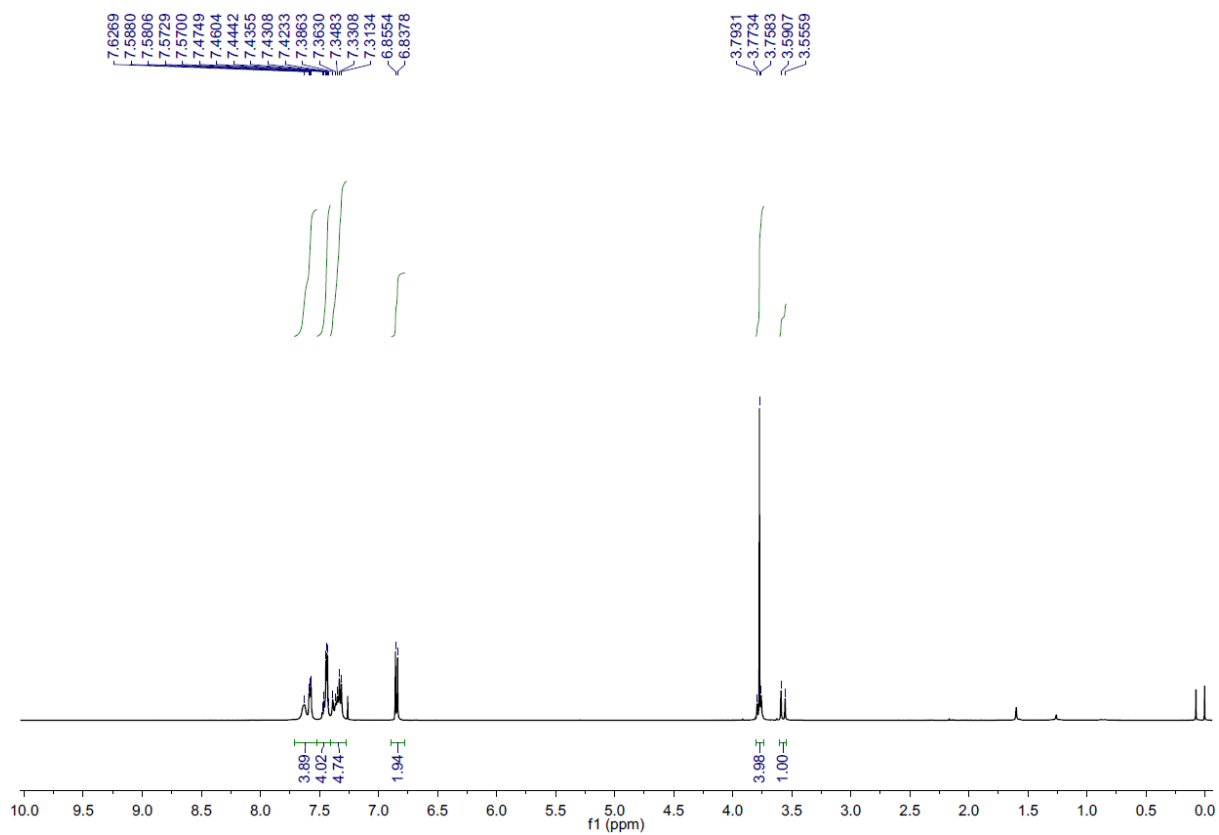

500 MHz  $^1\text{H}$  NMR spectrum of compound **4ai** in  $\text{CDCl}_3$

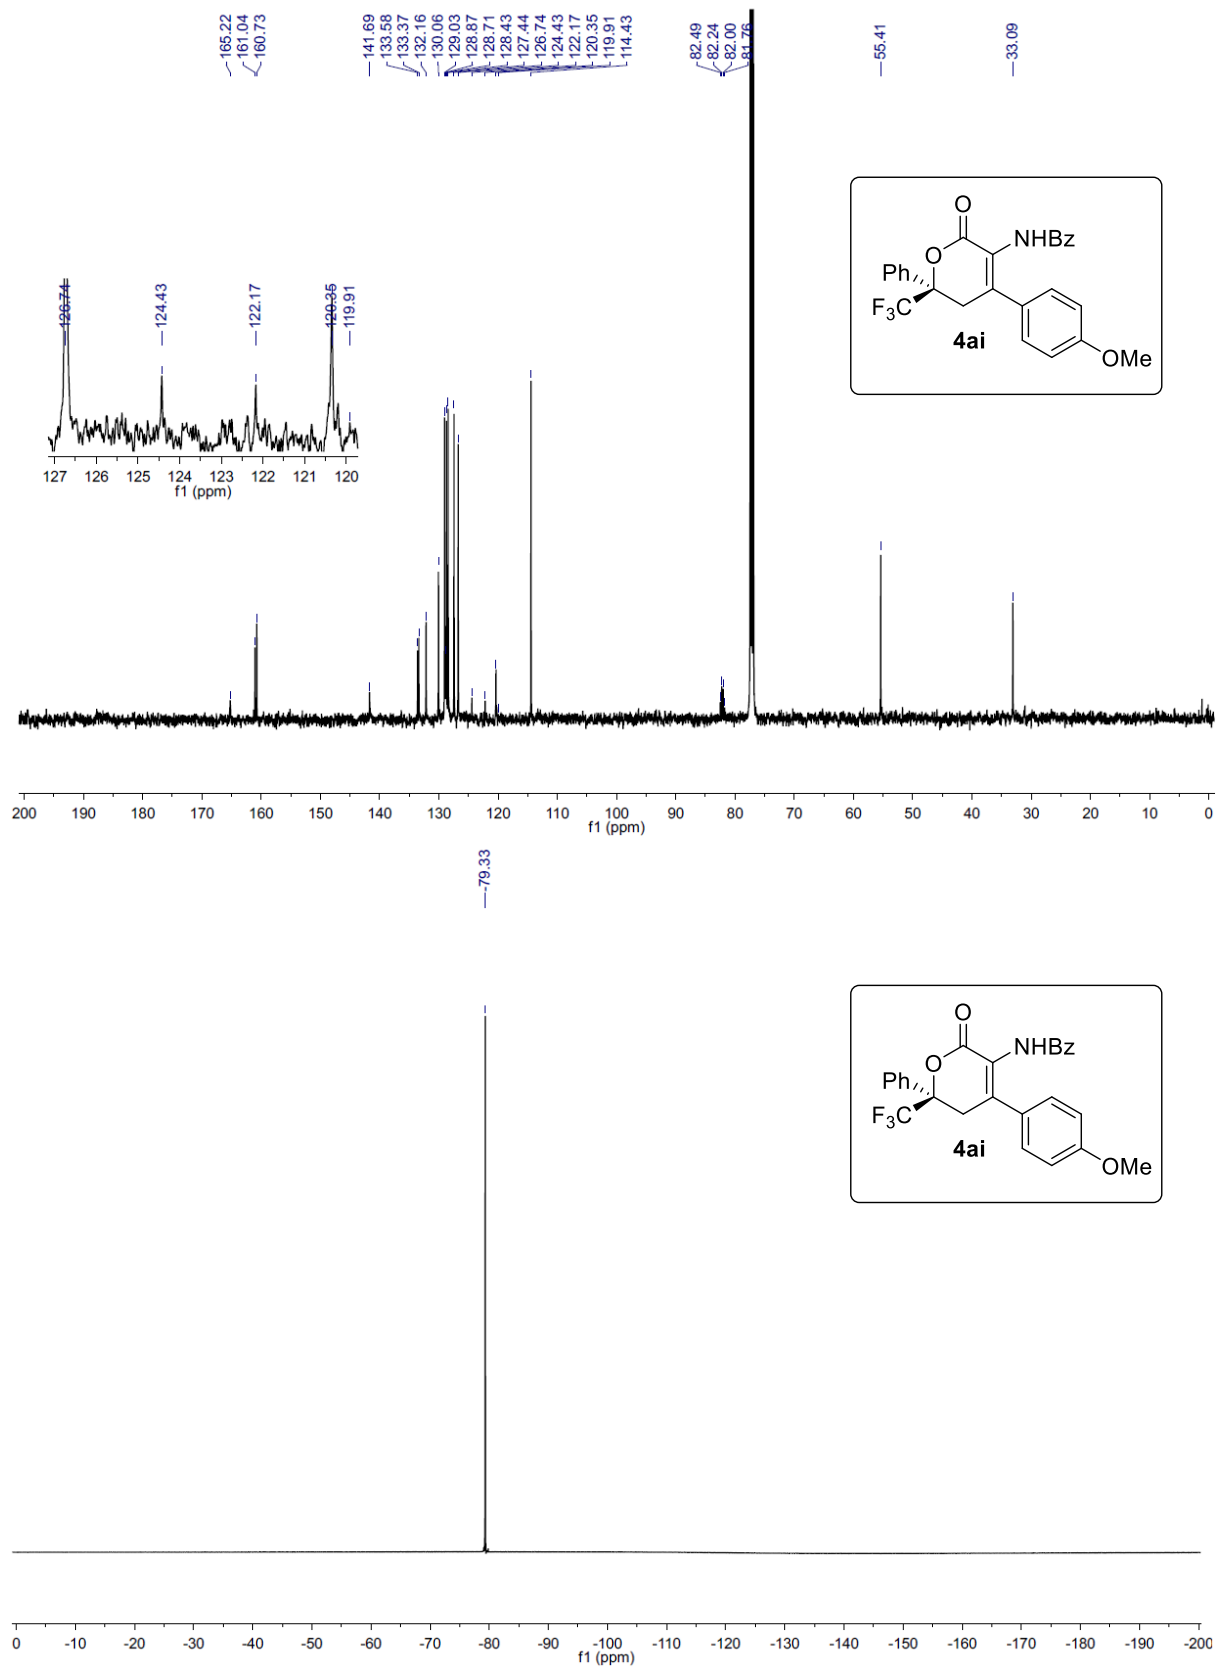

125 MHz <sup>13</sup>C NMR and 373 MHz <sup>19</sup>F NMR spectra of compound **4ai** in CDCl<sub>3</sub>

- (x) **(*R*)-*N*-(2-oxo-6-phenyl-4-(thiophen-2-yl)-6-(trifluoromethyl)-5,6-dihydro-2*H*-pyran-3-yl)benzamide (4aj)**

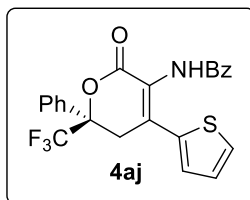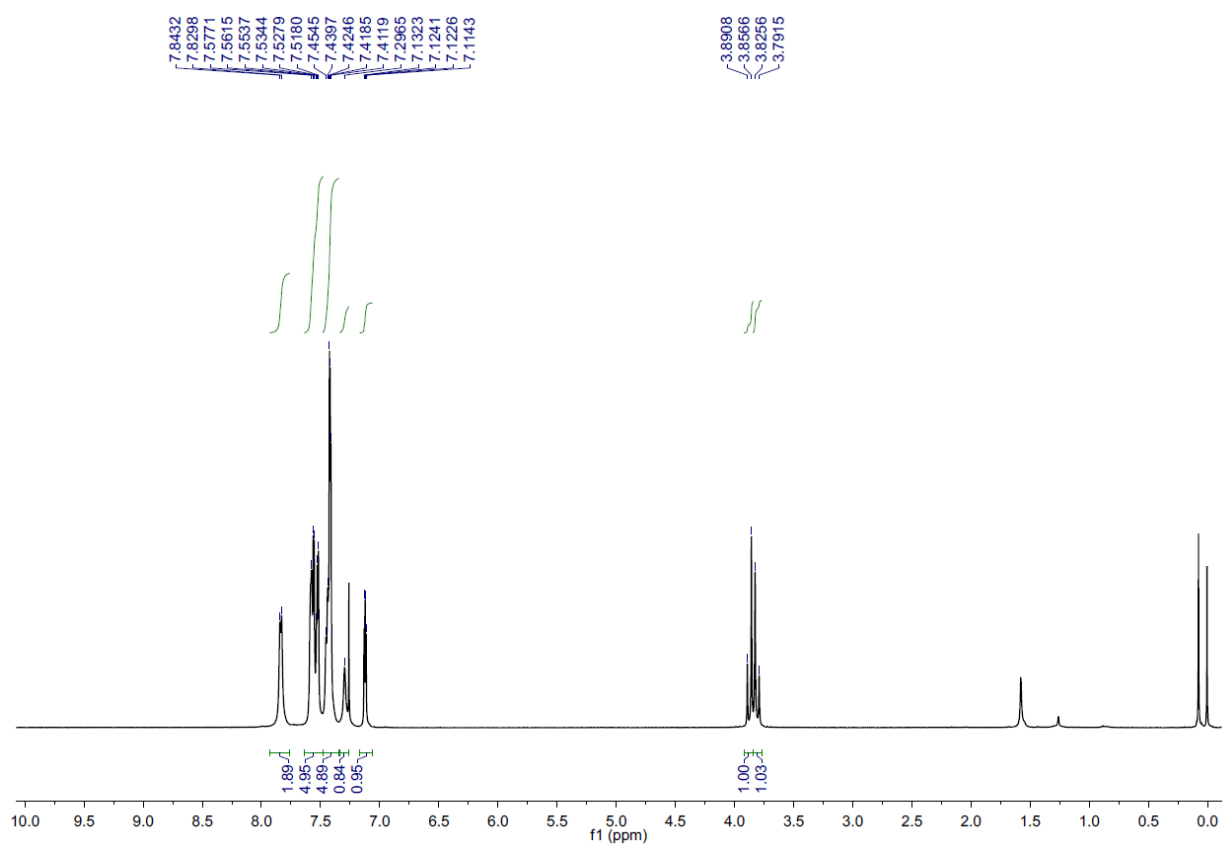

500 MHz  $^1\text{H}$  NMR spectrum of compound **4aj** in  $\text{CDCl}_3$

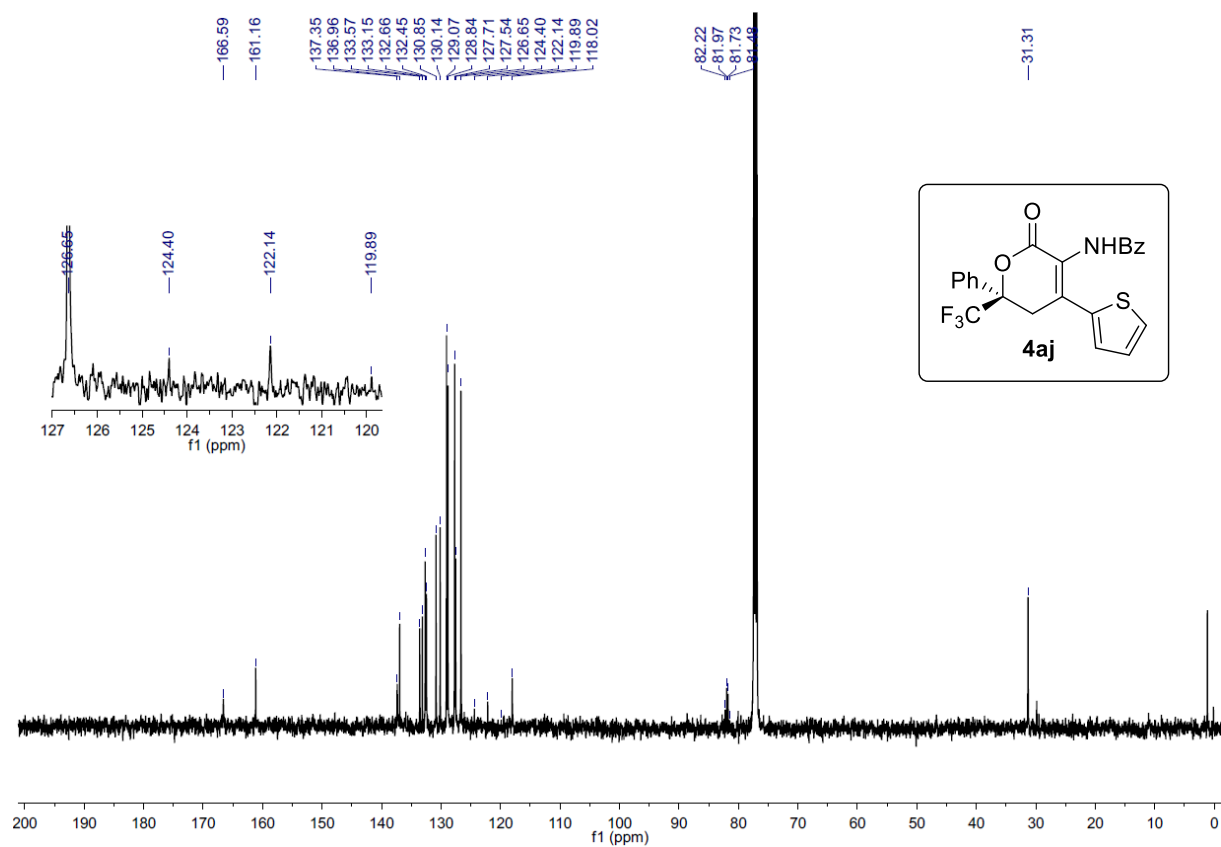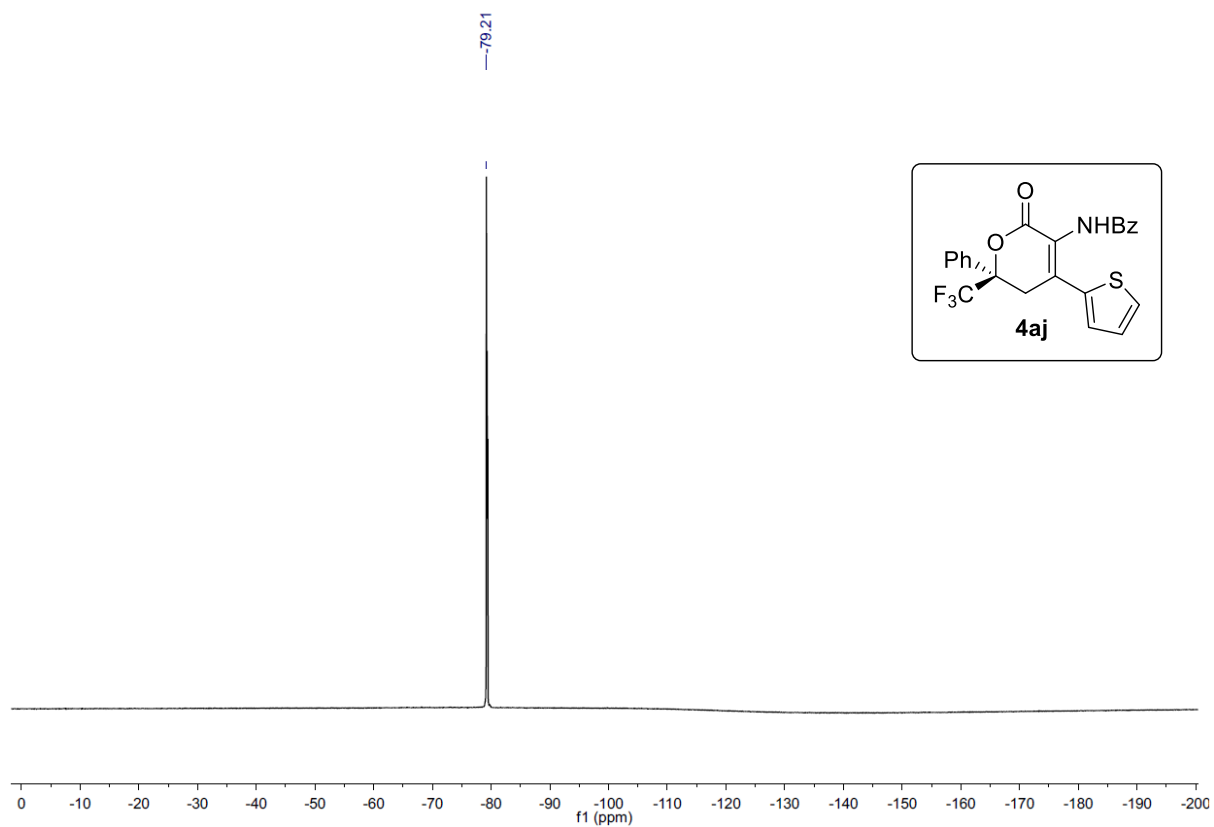

125 MHz  $^{13}\text{C}$  NMR and 373 MHz  $^{19}\text{F}$  NMR spectra of compound **4aj** in  $\text{CDCl}_3$

- (xi) **(*R*)-*N*-(4-(benzofuran-2-yl)-2-oxo-6-phenyl-6-(trifluoromethyl)-5,6-dihydro-2*H*-pyran-3-yl)benzamide (4ak)**

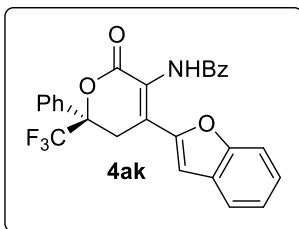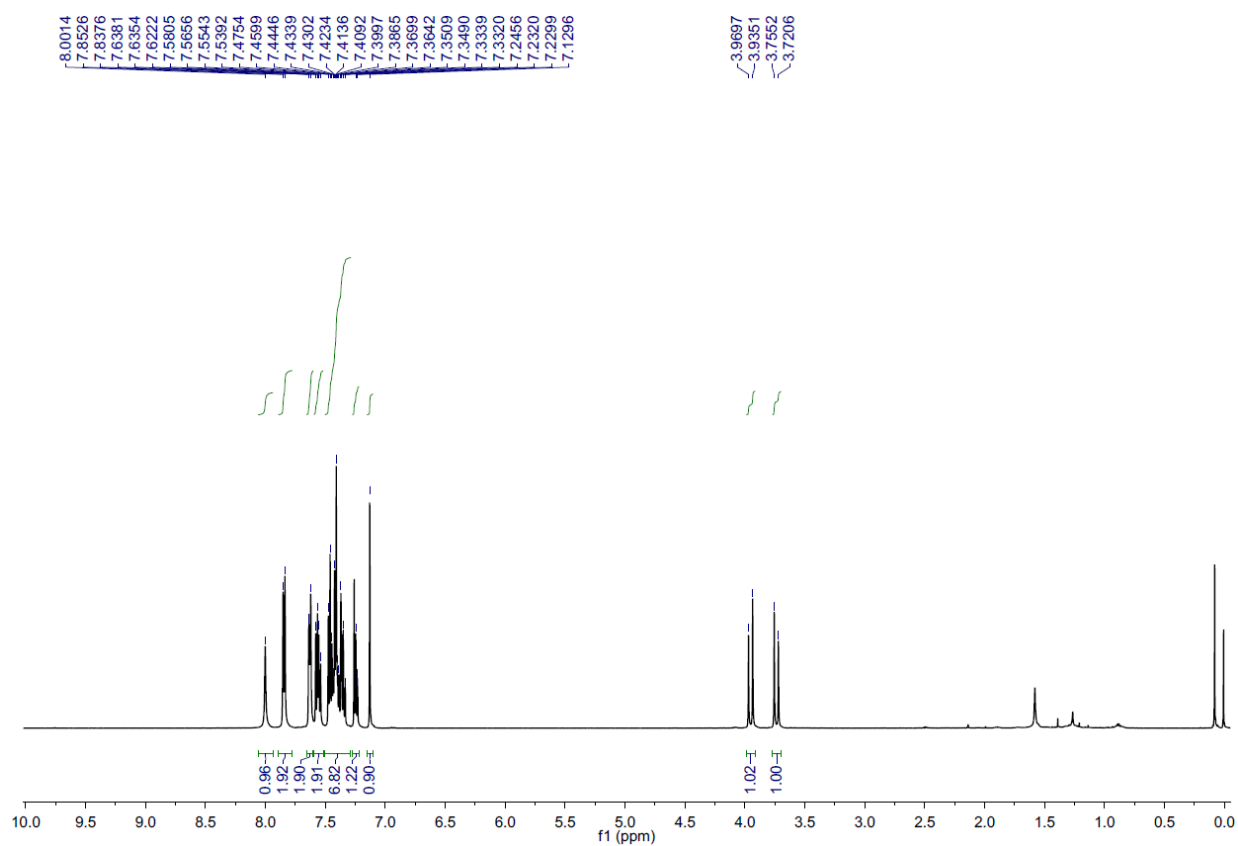

500 MHz  $^1\text{H}$  NMR spectrum of compound **4ak** in  $\text{CDCl}_3$

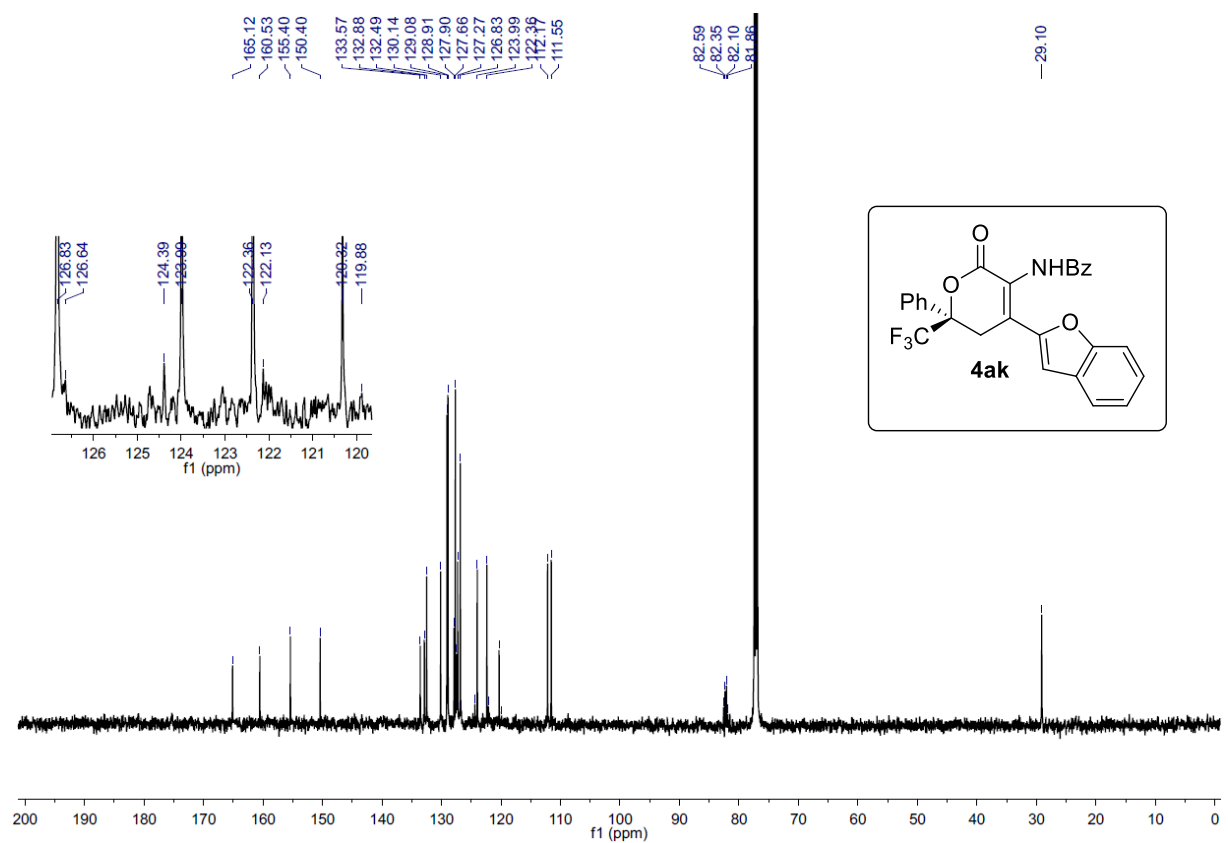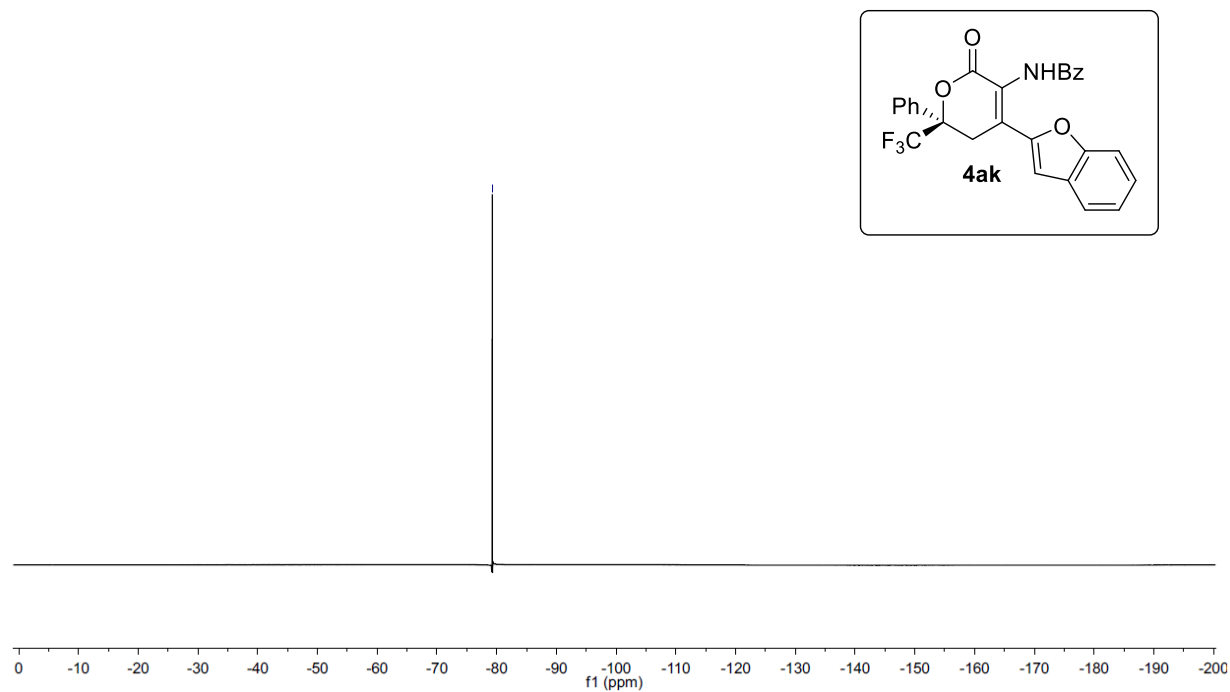

125 MHz  $^{13}\text{C}$  NMR and 373 MHz  $^{19}\text{F}$  NMR spectra of compound **4ak** in  $\text{CDCl}_3$

- (xii) **(*R*)-*N*-(4-(naphthalen-2-yl)-2-oxo-6-phenyl-6-(trifluoromethyl)-5,6-dihydro-2*H*-pyran-3-yl)benzamide (4al)**

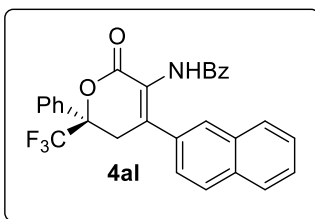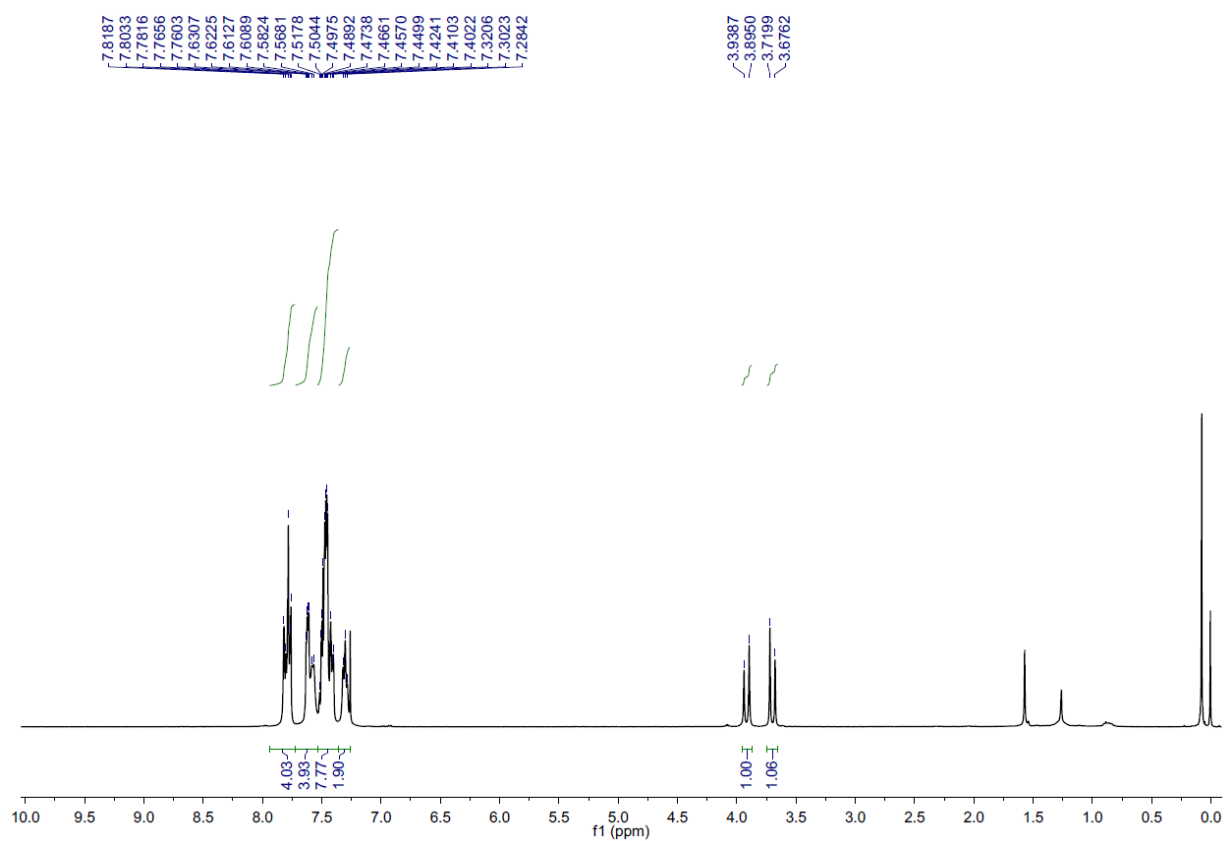

400 MHz  $^1\text{H}$  NMR spectrum of compound **4al** in  $\text{CDCl}_3$



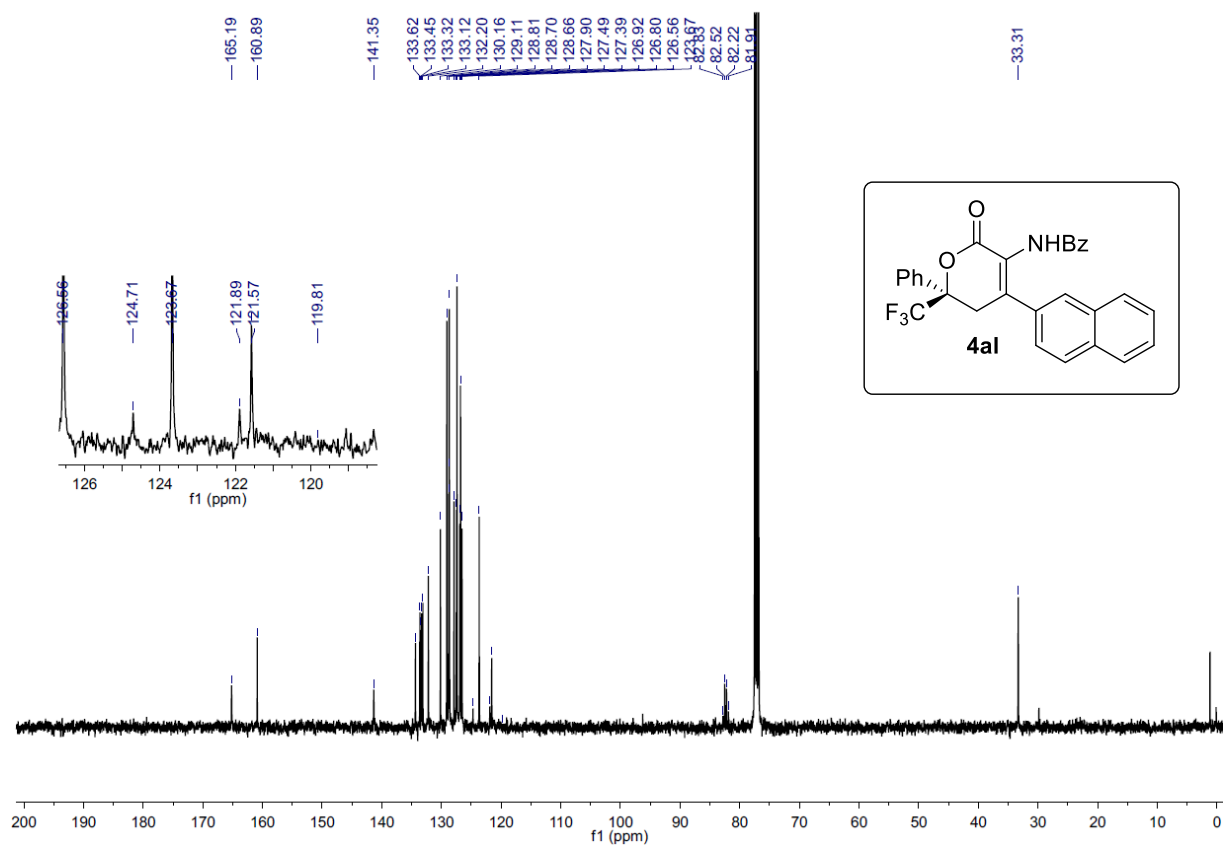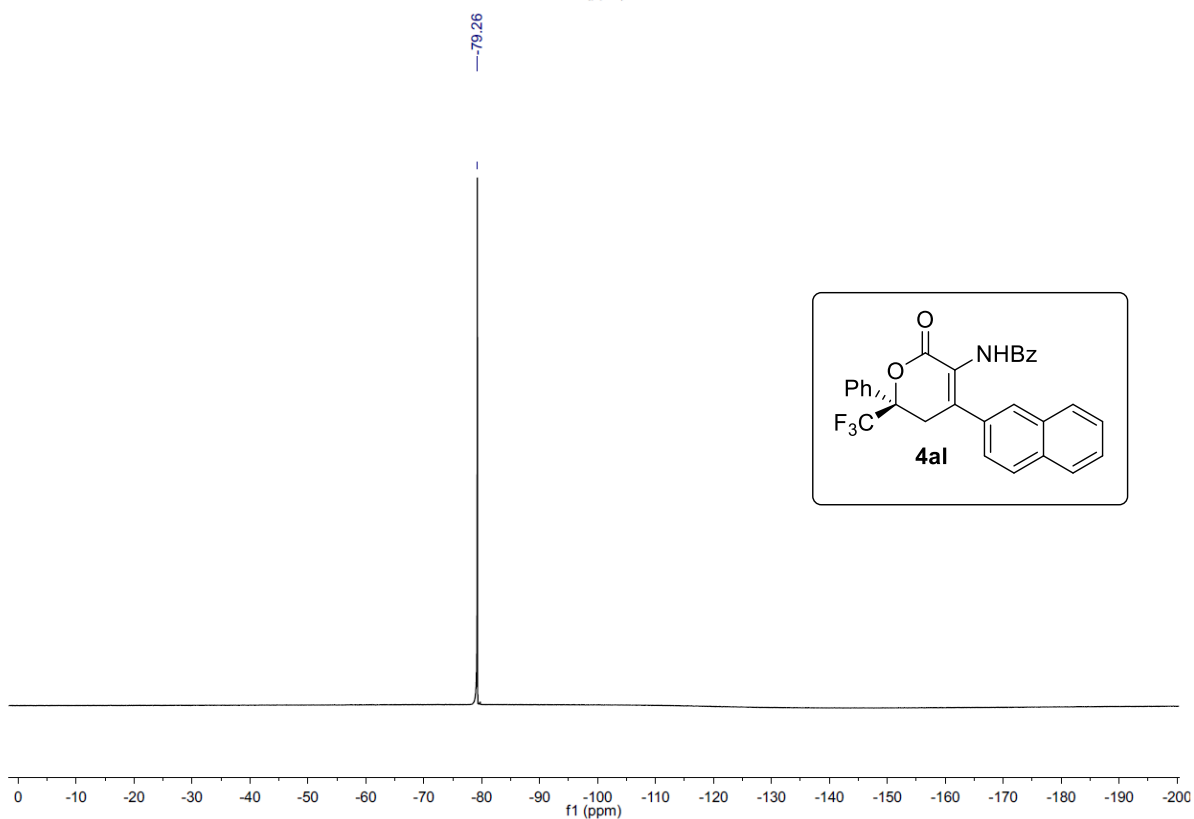

100 MHz  $^{13}\text{C}$  NMR and 373 MHz  $^{19}\text{F}$  NMR spectra of compound **4al** in  $\text{CDCl}_3$

(xiii) (*R*)-*N*-(4-cyclopropyl-2-oxo-6-phenyl-6-(trifluoromethyl)-5,6-dihydro-2*H*-pyran-3-yl)benzamide (**4am**)

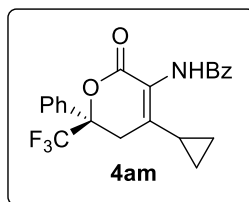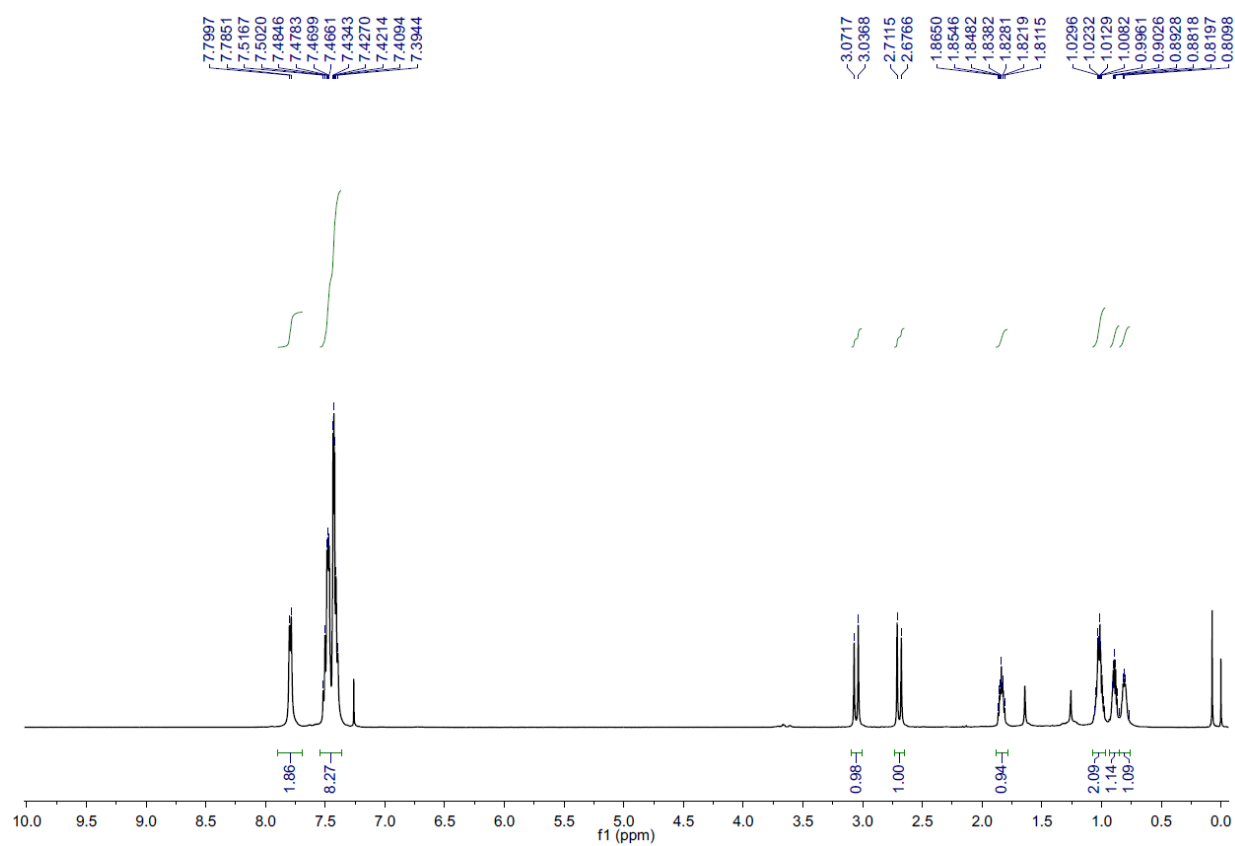

500 MHz  $^1\text{H}$  NMR spectrum of compound **4am** in  $\text{CDCl}_3$

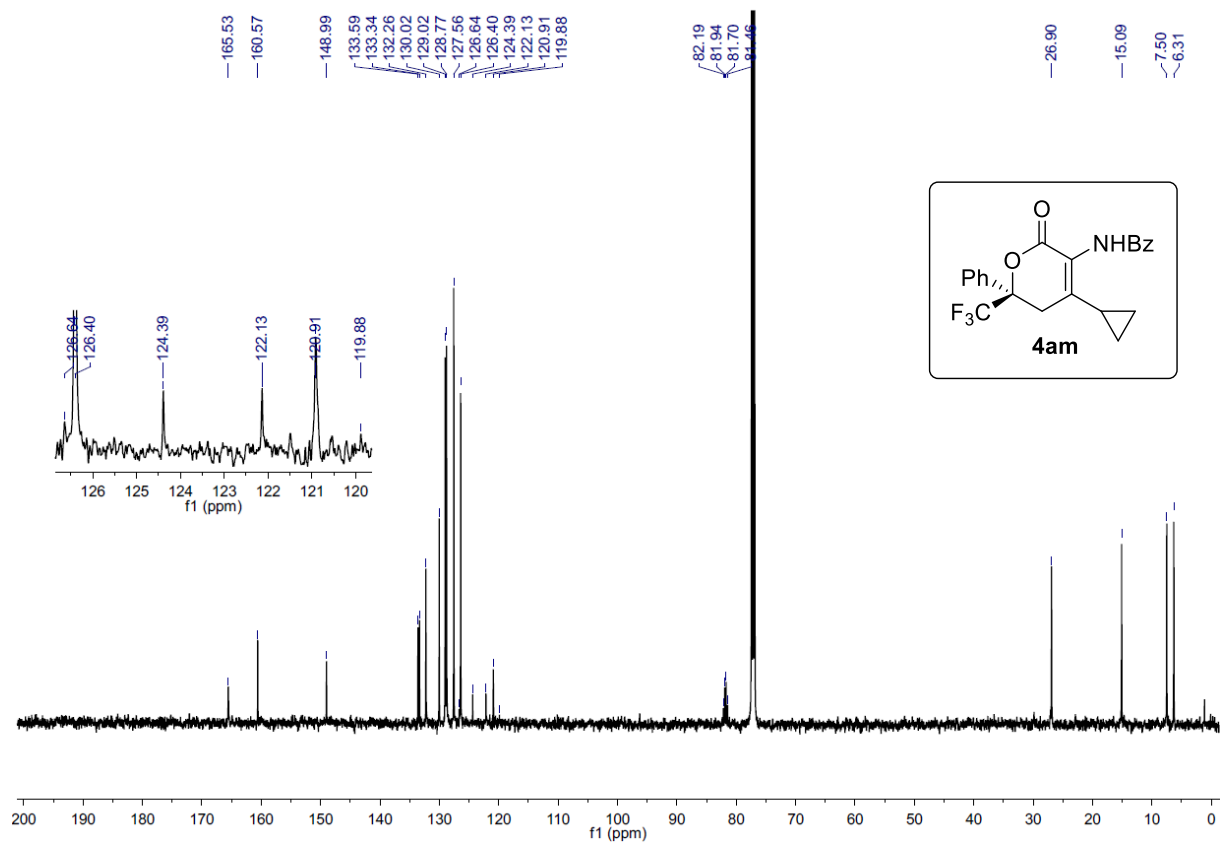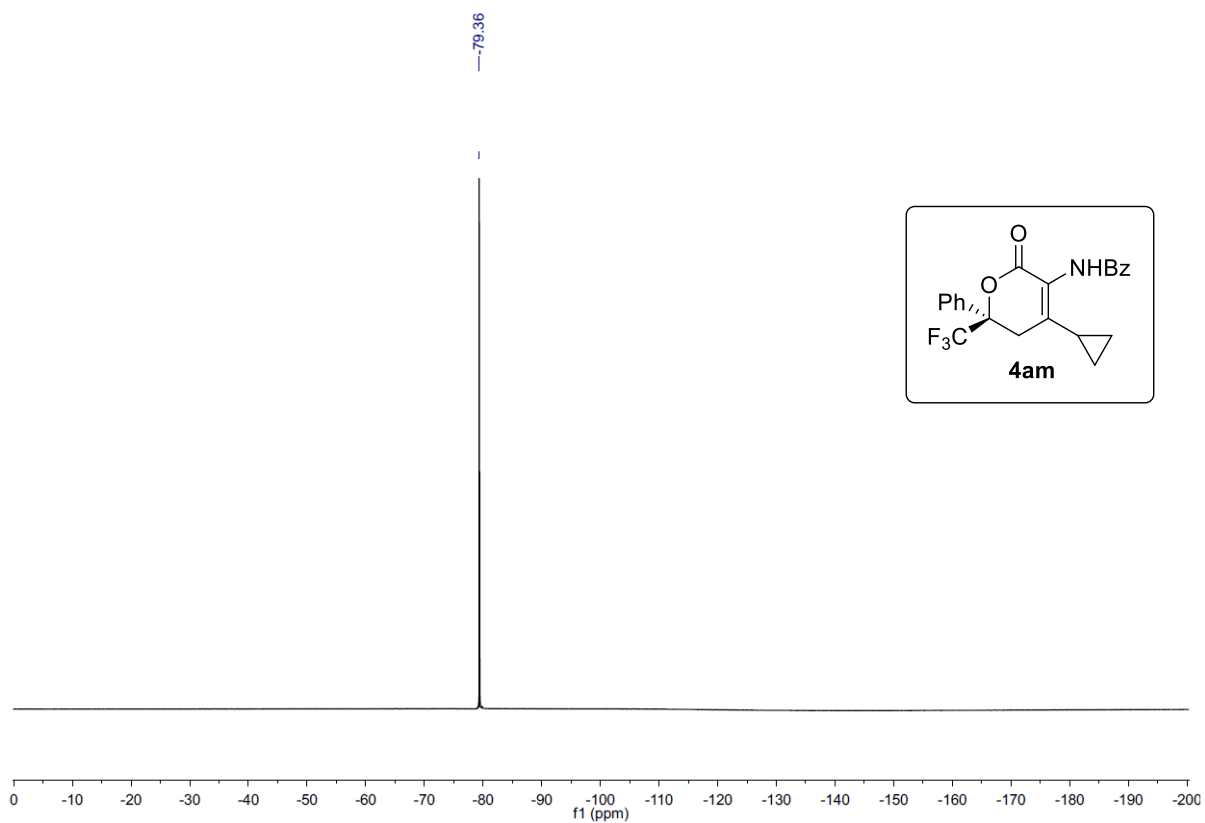

125 MHz  $^{13}\text{C}$  NMR and 373 MHz  $^{19}\text{F}$  NMR spectra of compound **4am** in  $\text{CDCl}_3$

- (xiv) (*R*)-*N*-(4-isopropyl-2-oxo-6-phenyl-6-(trifluoromethyl)-5,6-dihydro-2*H*-pyran-3-yl)benzamide (**4an**)

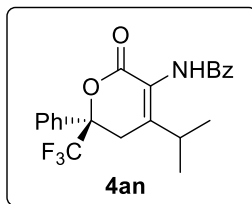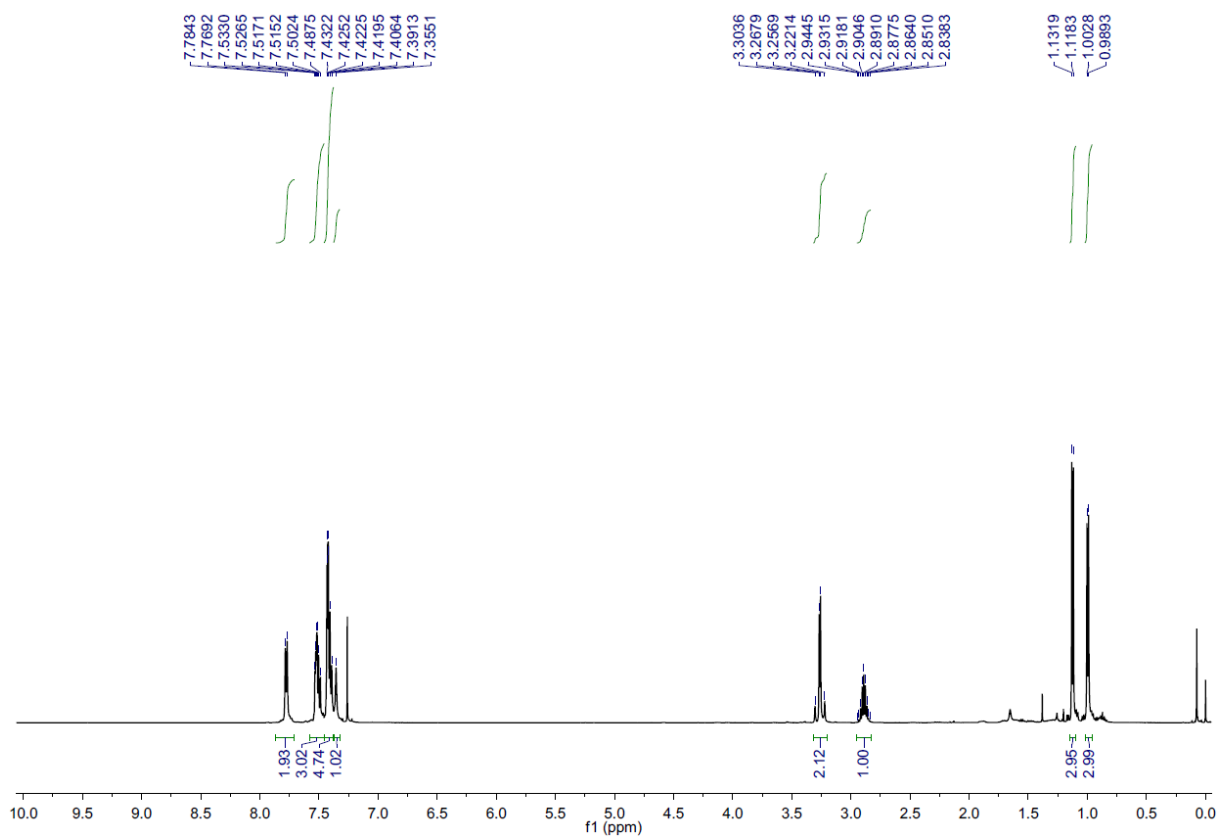

500 MHz  $^1\text{H}$  NMR spectrum of compound **4an** in  $\text{CDCl}_3$

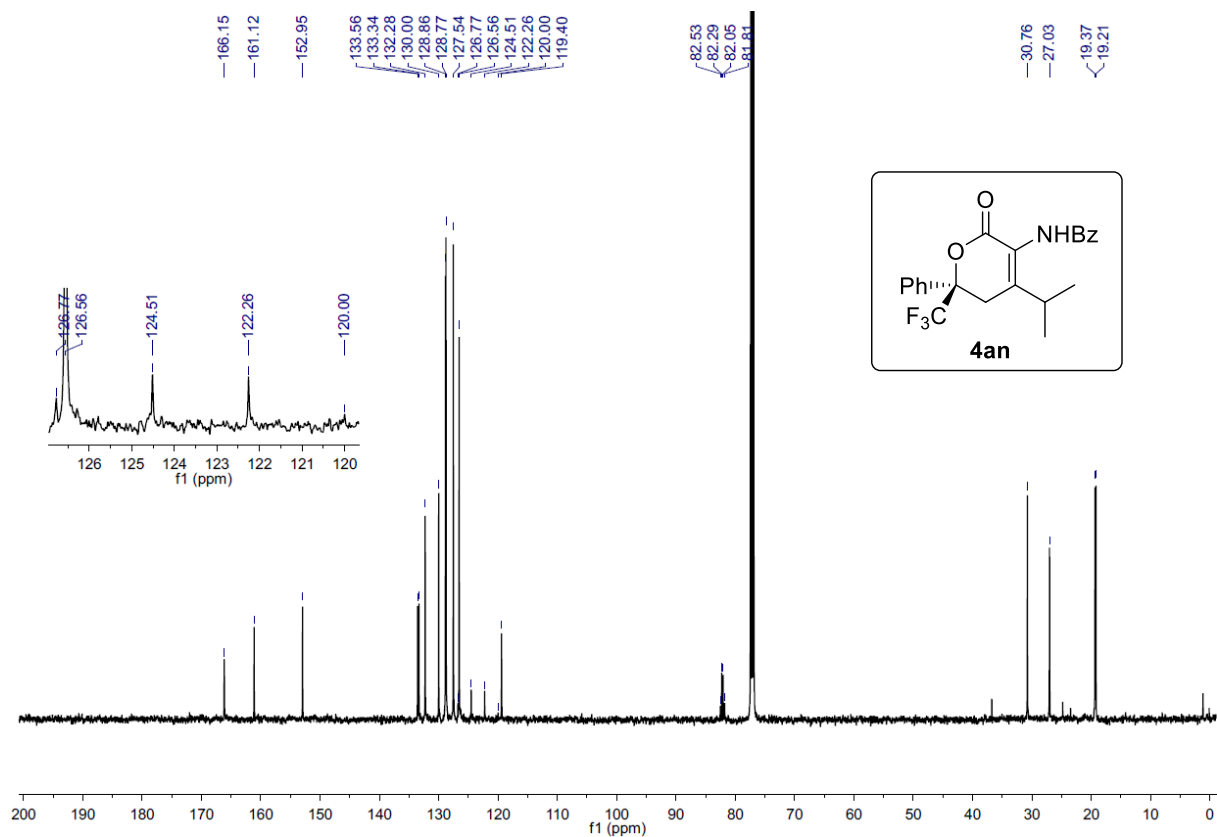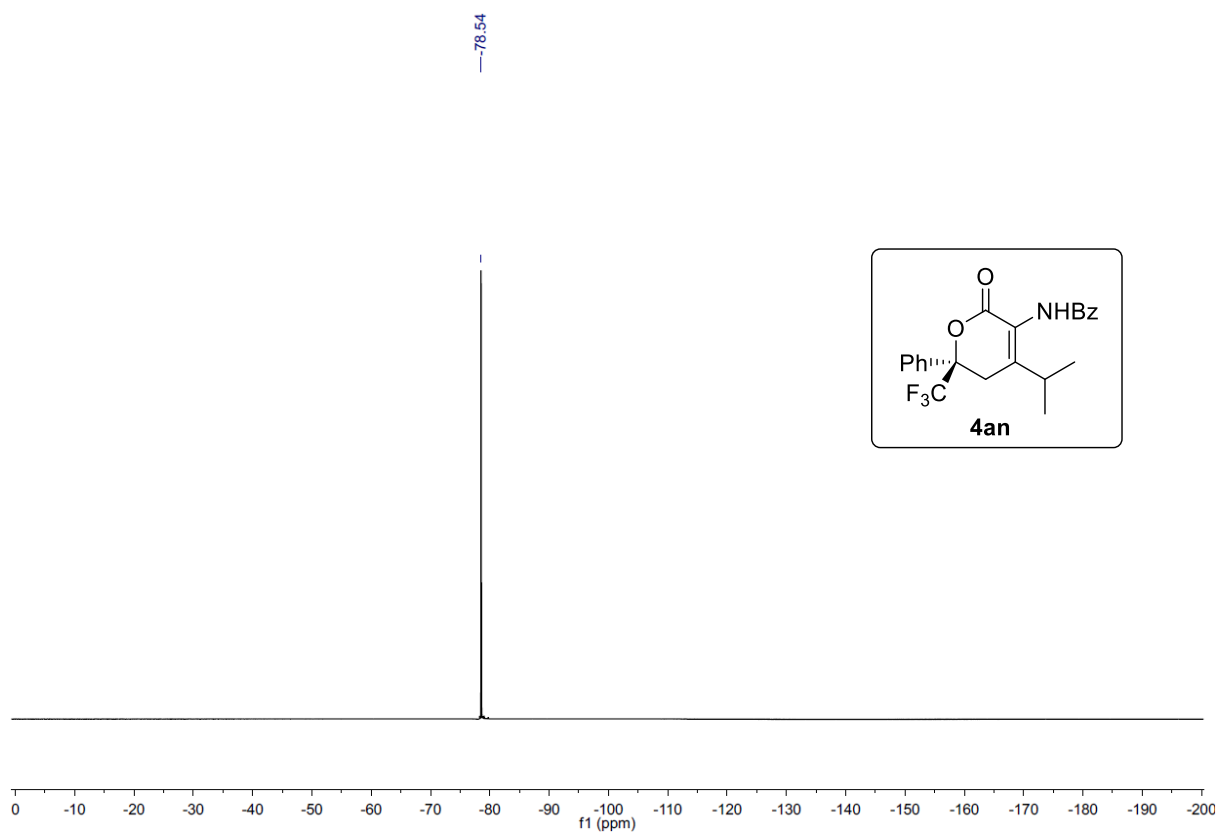

125 MHz <sup>13</sup>C NMR and 373 MHz <sup>19</sup>F NMR spectra of compound **4an** in CDCl<sub>3</sub>

(xv) **(*R*)-*N*-(6-(4-fluorophenyl)-2-oxo-4-phenyl-6-(trifluoromethyl)-5,6-dihydro-2*H*-pyran-3-yl)benzamide (4ba)**

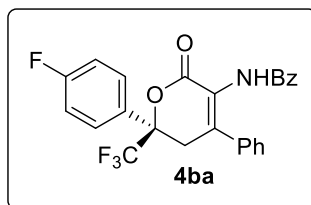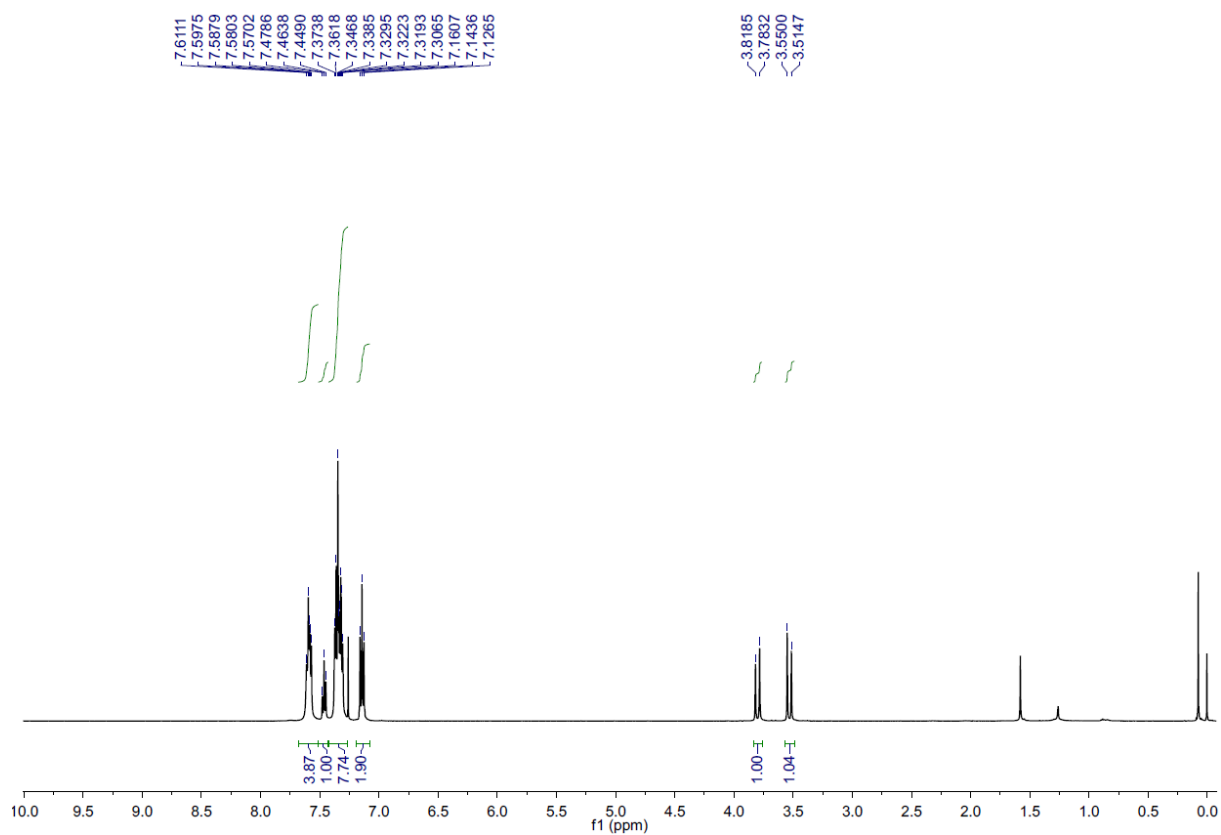

500 MHz  $^1\text{H}$  NMR spectrum of compound **4ba** in  $\text{CDCl}_3$

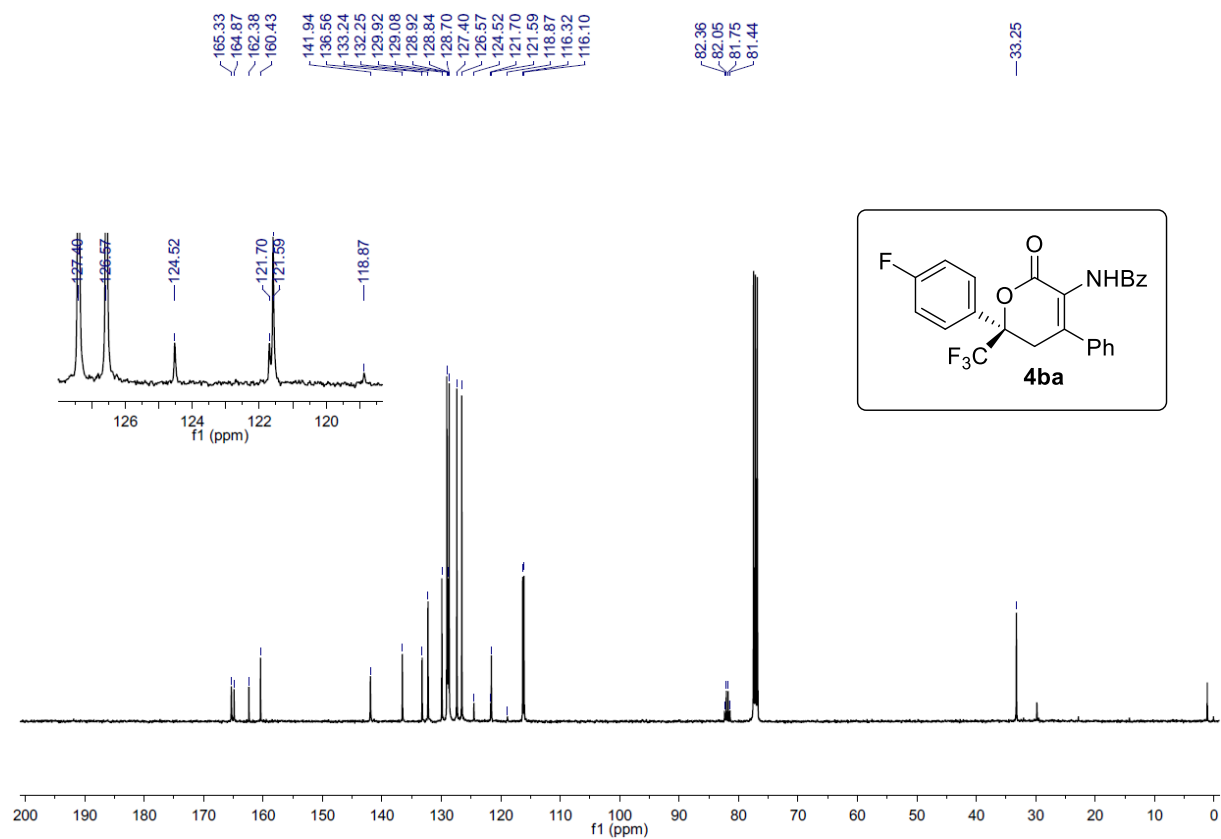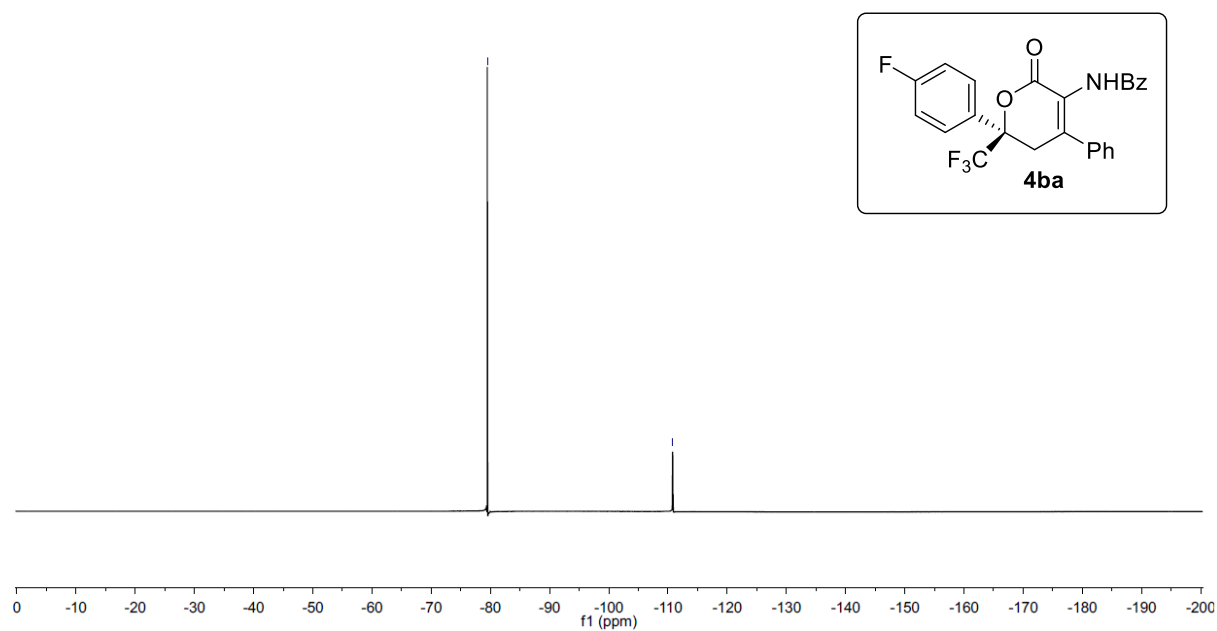

100 MHz  $^{13}\text{C}$  NMR and 373 MHz  $^{19}\text{F}$  NMR spectra of compound **4ba** in  $\text{CDCl}_3$

(xvi) **(*R*)-*N*-(6-(4-chlorophenyl)-2-oxo-4-phenyl-6-(trifluoromethyl)-5,6-dihydro-2*H*-pyran-3-yl)benzamide (4ca)**

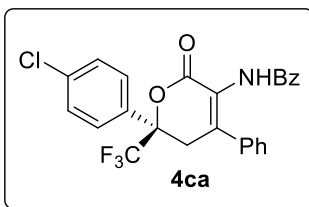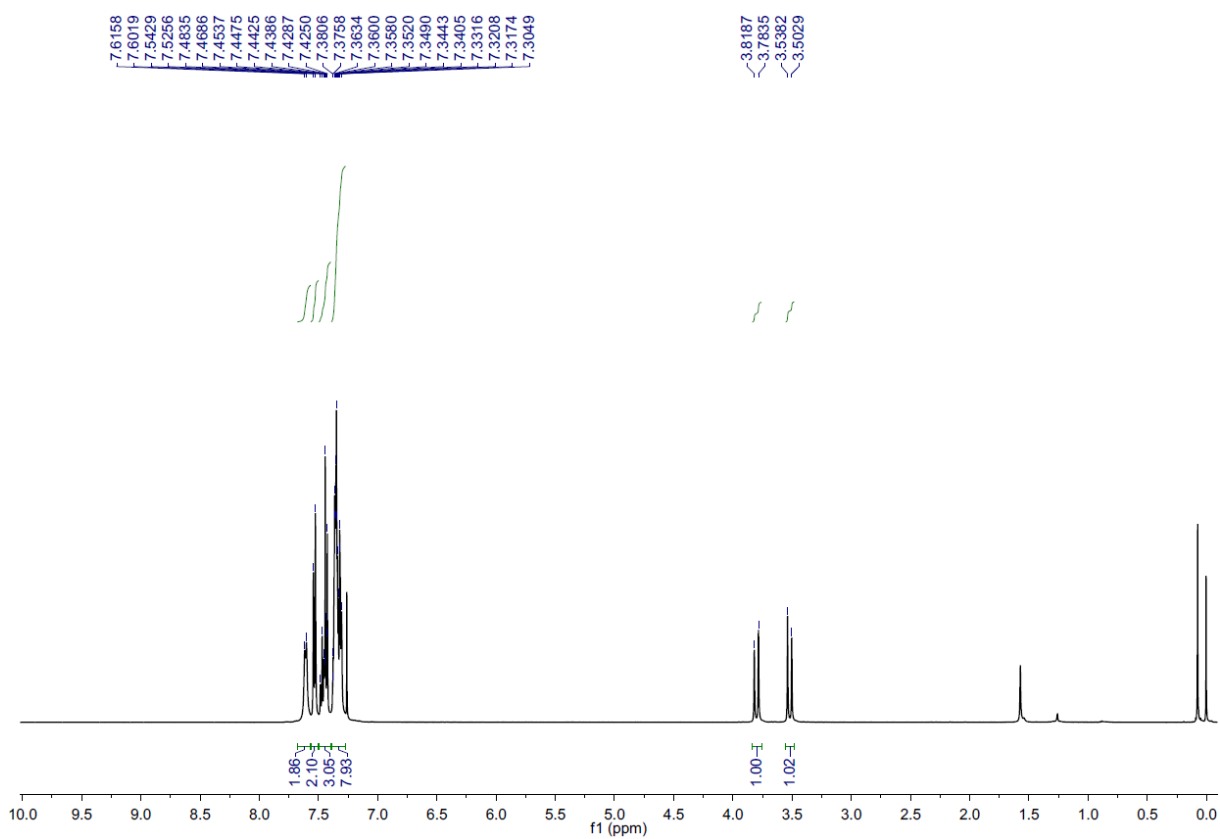

500 MHz  $^1\text{H}$  NMR spectrum of compound **4ca** in  $\text{CDCl}_3$



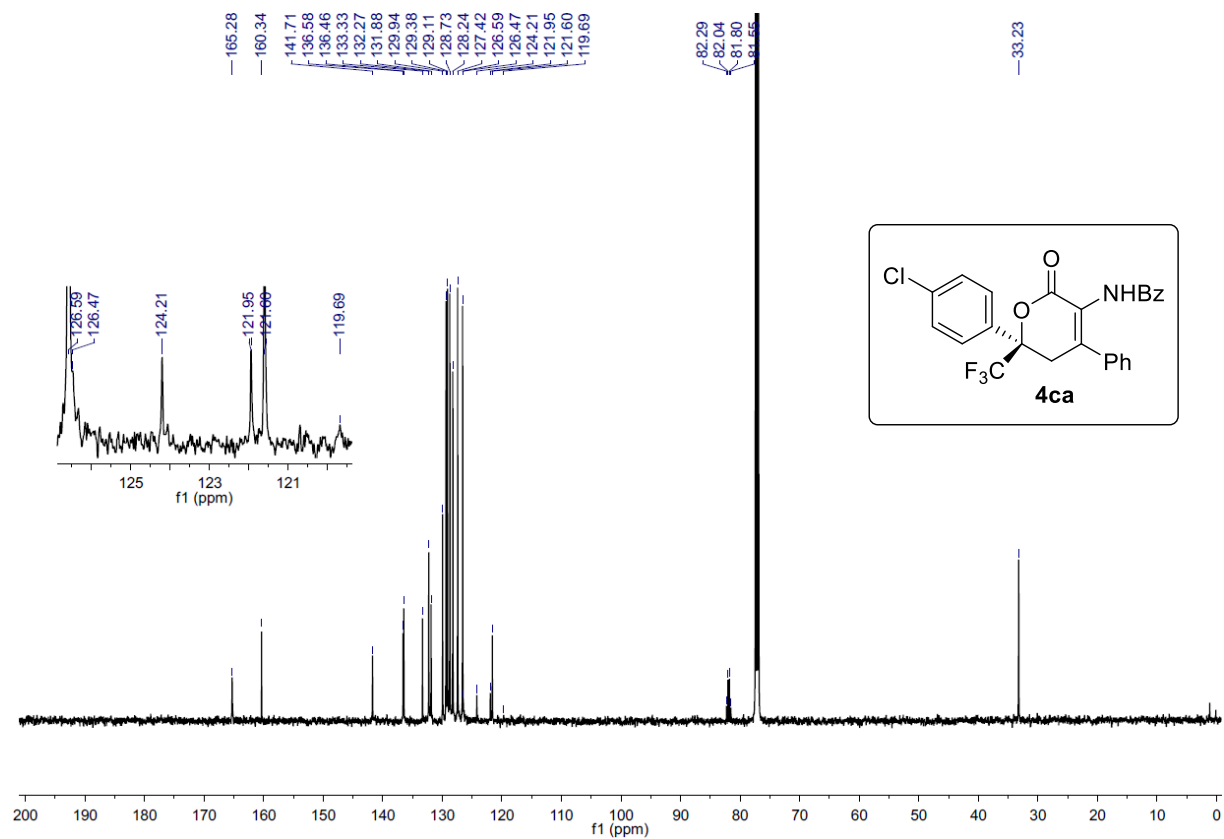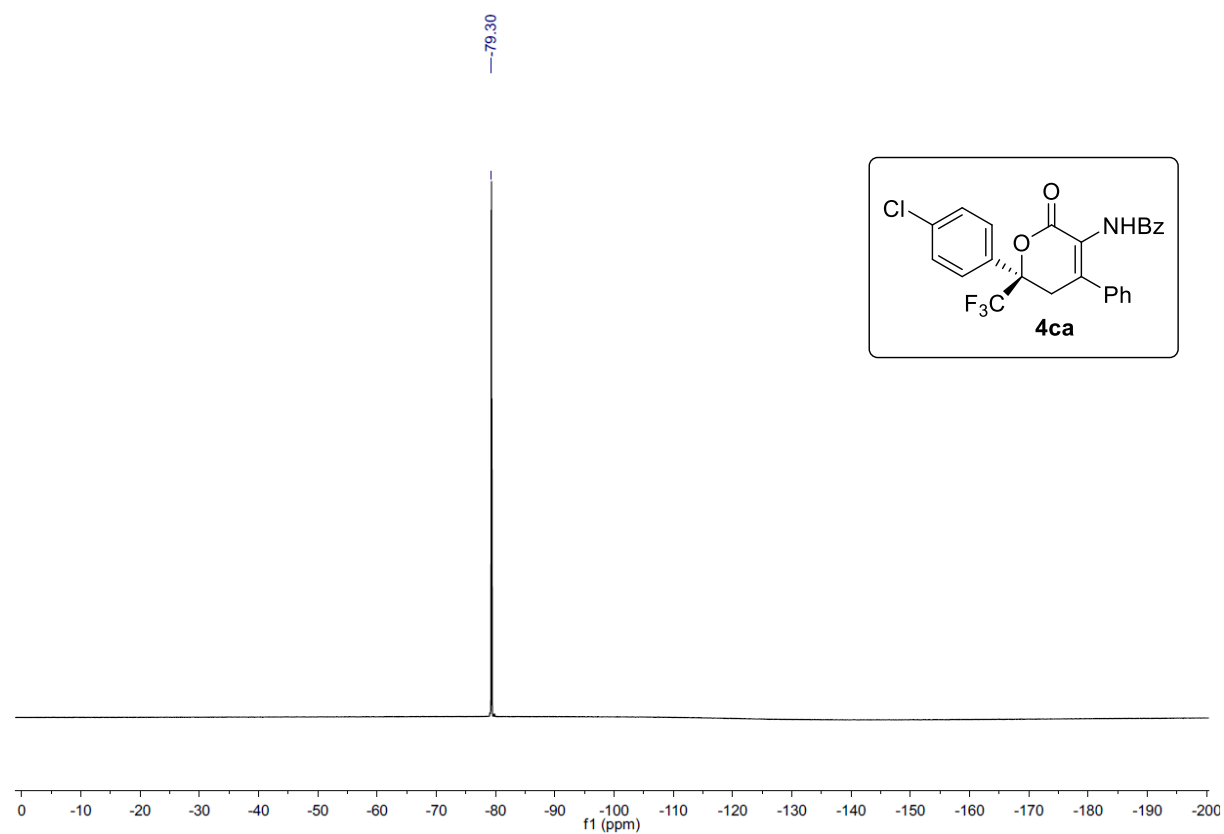

125 MHz <sup>13</sup>C NMR and 373 MHz <sup>19</sup>F NMR spectra of compound **4ca** in CDCl<sub>3</sub>

(xvii) (*R*)-*N*-(2-oxo-4-phenyl-6-(*p*-tolyl)-6-(trifluoromethyl)-5,6-dihydro-2*H*-pyran-3-yl)benzamide (**4da**)

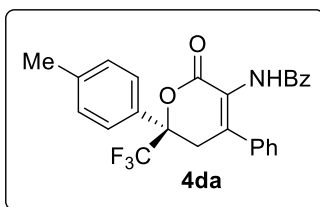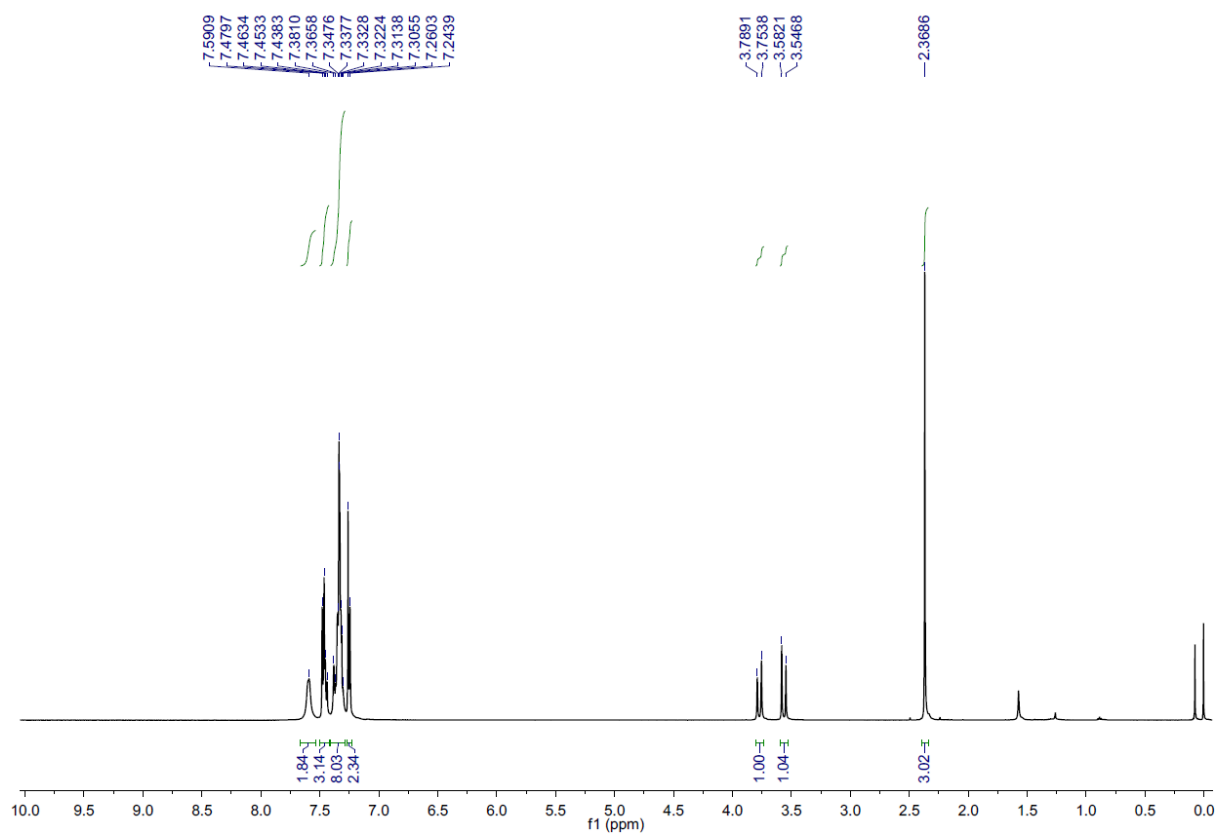

500 MHz  $^1\text{H}$  NMR spectrum of compound **4da** in  $\text{CDCl}_3$

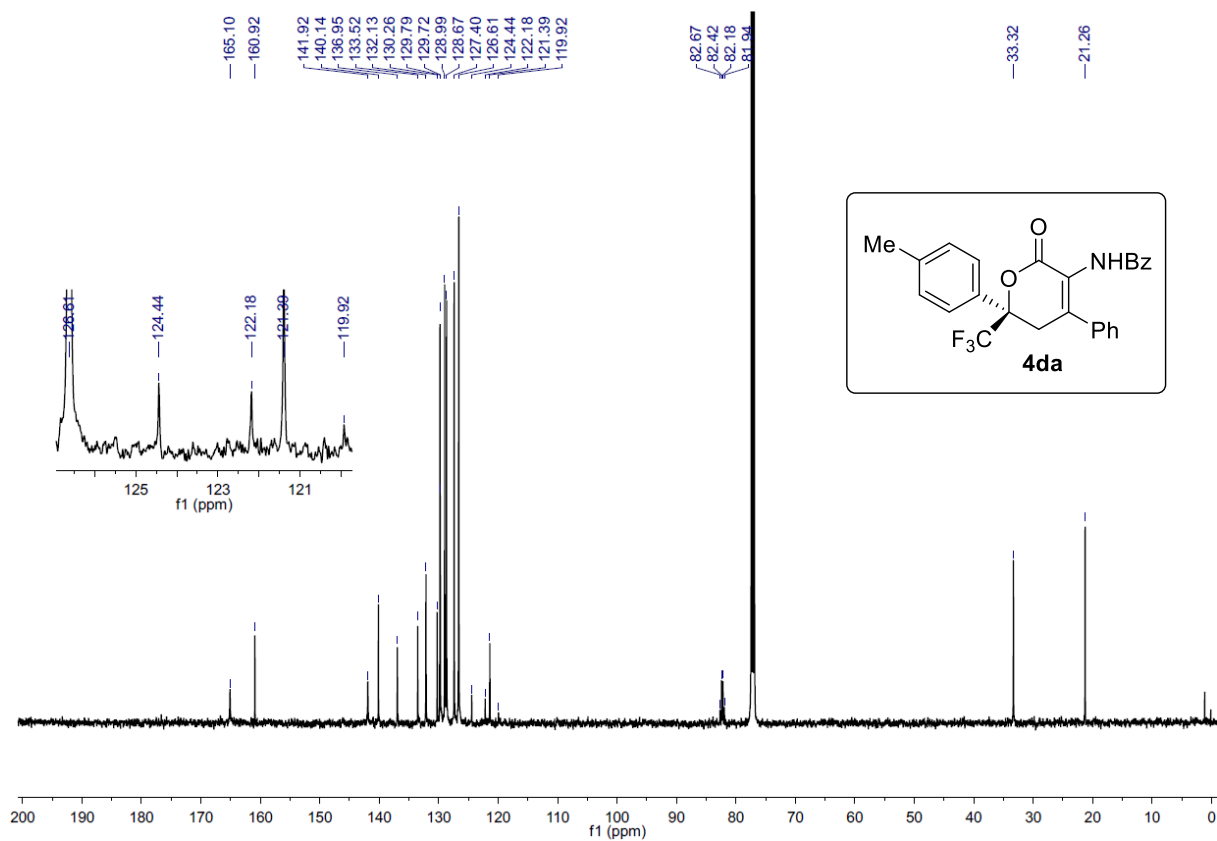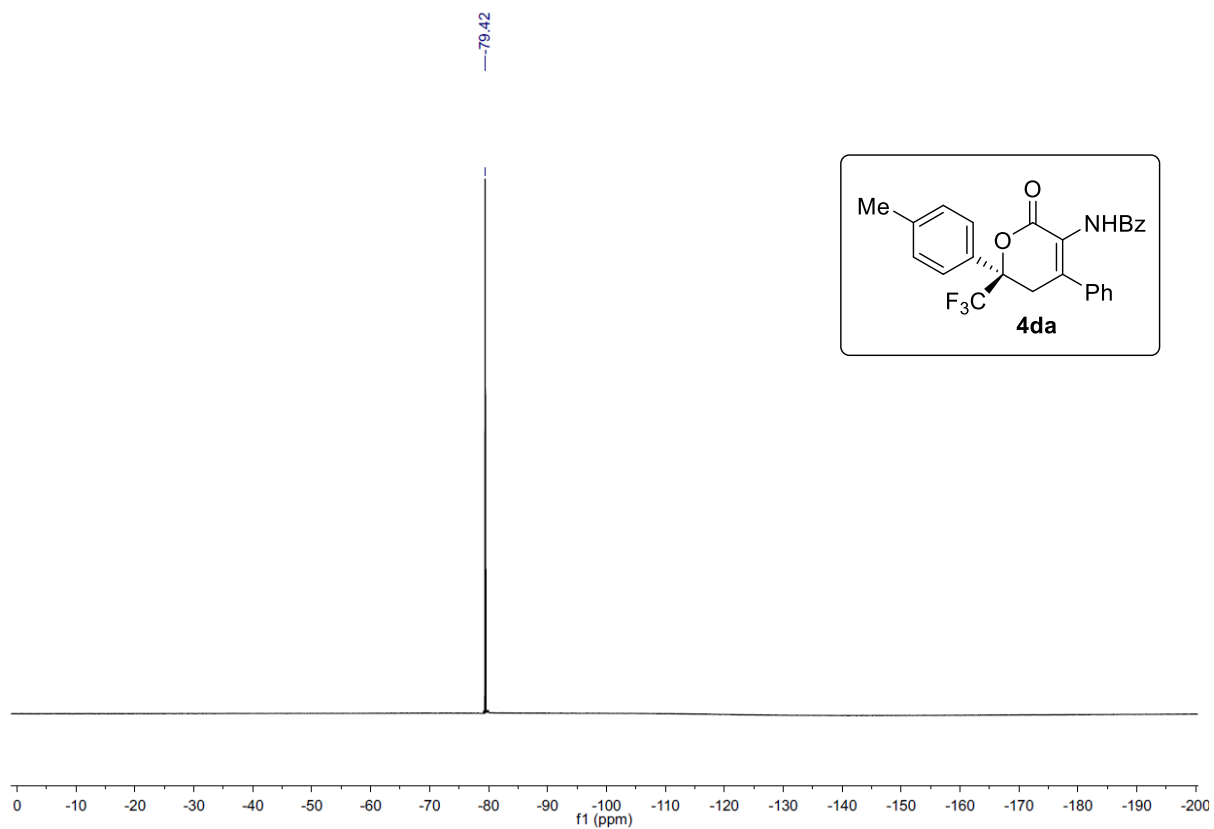

125 MHz  $^{13}\text{C}$  NMR and 373 MHz  $^{19}\text{F}$  NMR spectra of compound **4da** in  $\text{CDCl}_3$

(xviii) (*R*)-*N*-(6-(2,3-dihydrobenzofuran-5-yl)-2-oxo-4-phenyl-6-(trifluoromethyl)-5,6-dihydro-2*H*-pyran-3-yl)benzamide (**4ea**)

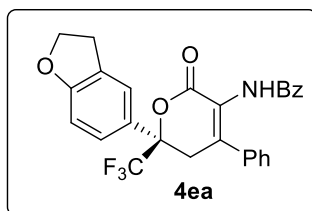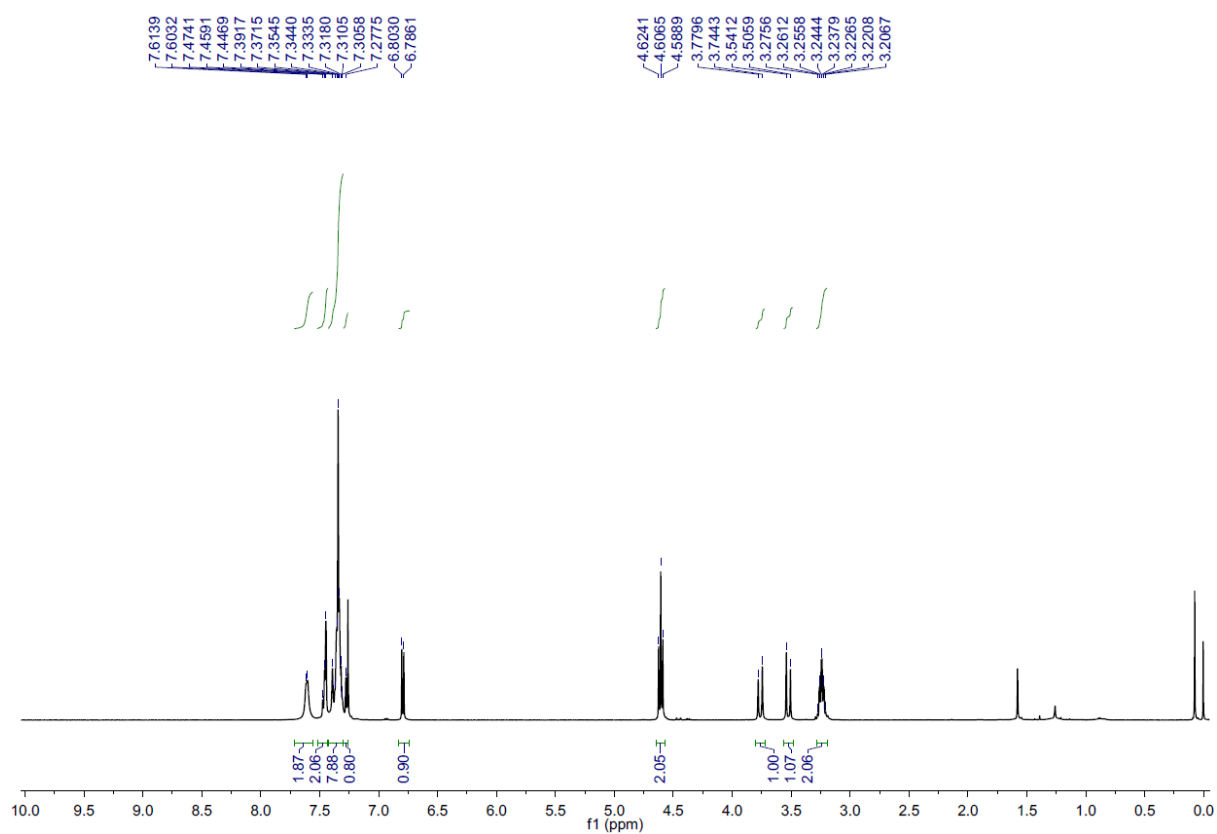

500 MHz  $^1\text{H}$  NMR spectrum of compound **4ea** in  $\text{CDCl}_3$

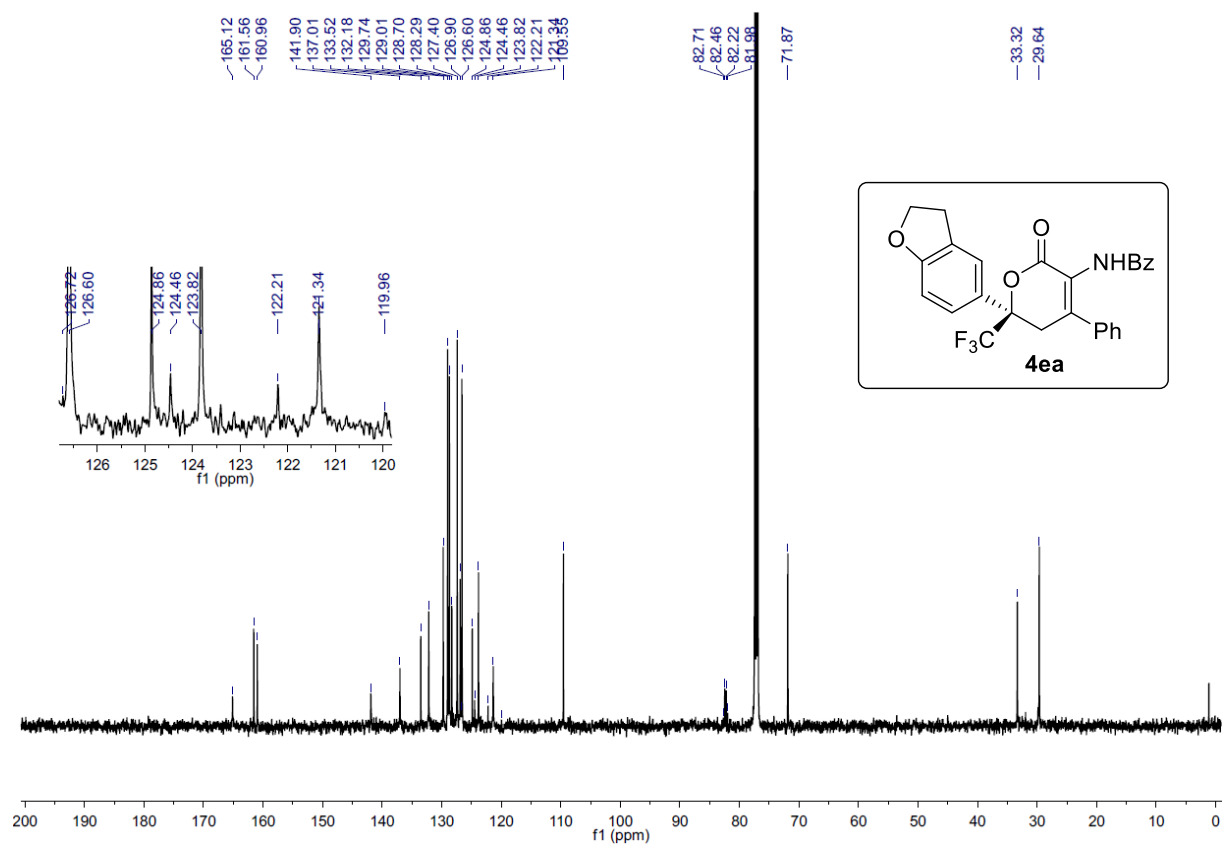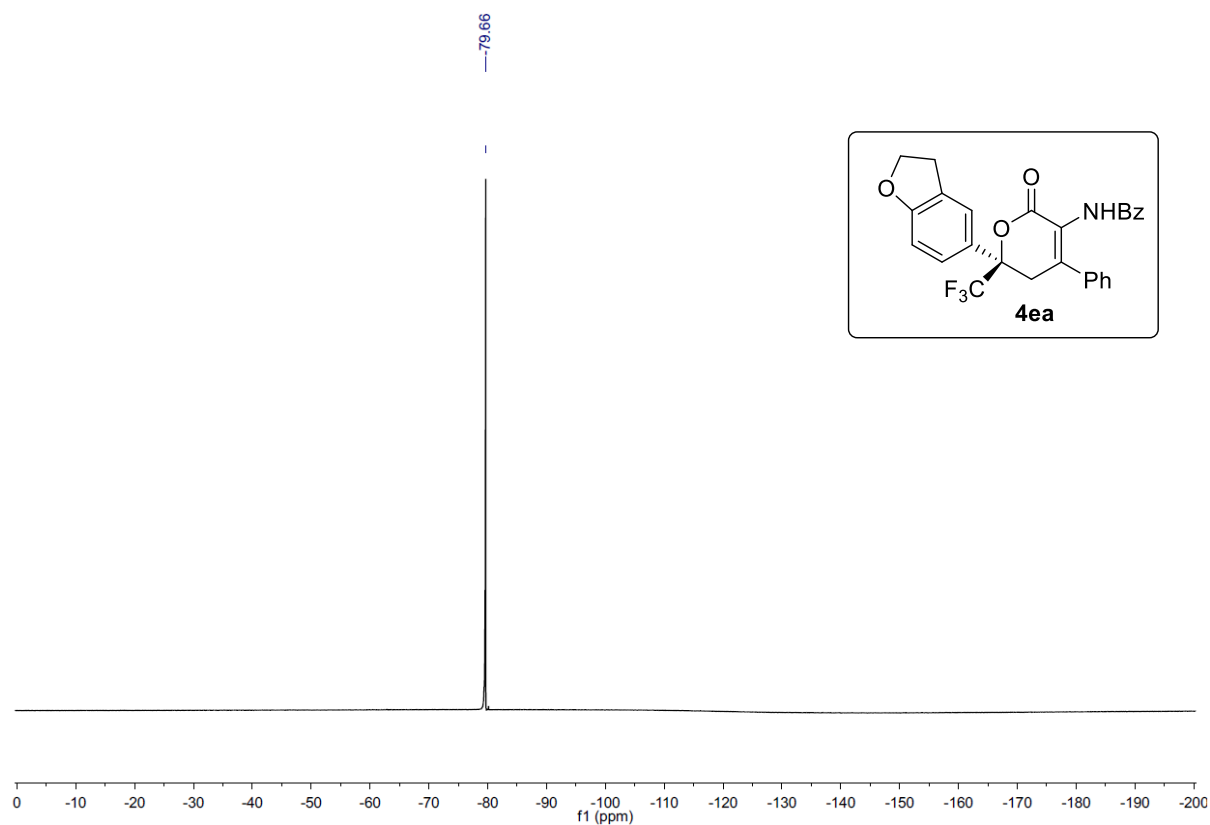

125 MHz  $^{13}\text{C}$  NMR and 373 MHz  $^{19}\text{F}$  NMR spectra of compound **4ea** in  $\text{CDCl}_3$

(xix) **(*R*)-*N*-(6-(4-chlorophenyl)-4-(4-methoxyphenyl)-2-oxo-6-(trifluoromethyl)-5,6-dihydro-2*H*-pyran-3-yl)benzamide (4ci)**

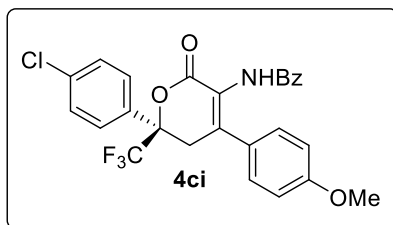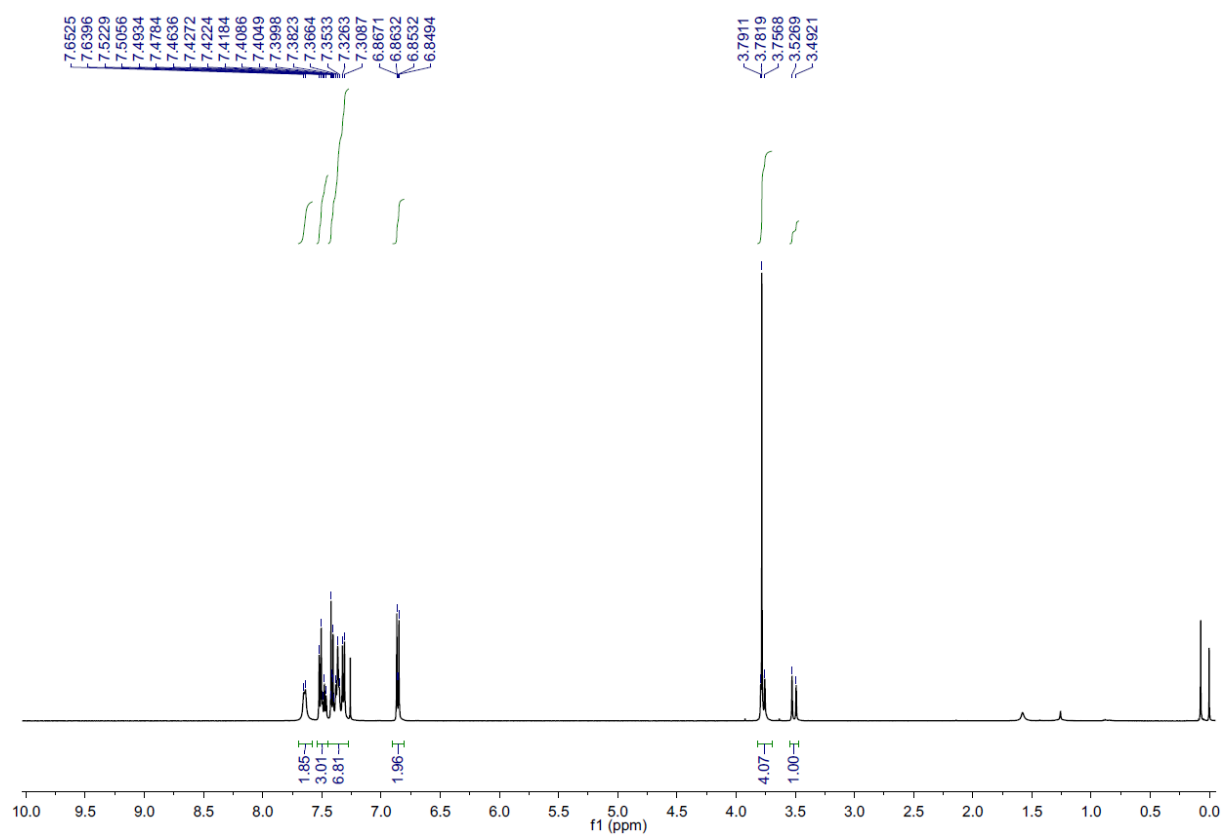

500 MHz  $^1\text{H}$  NMR spectrum of compound **4ci** in  $\text{CDCl}_3$

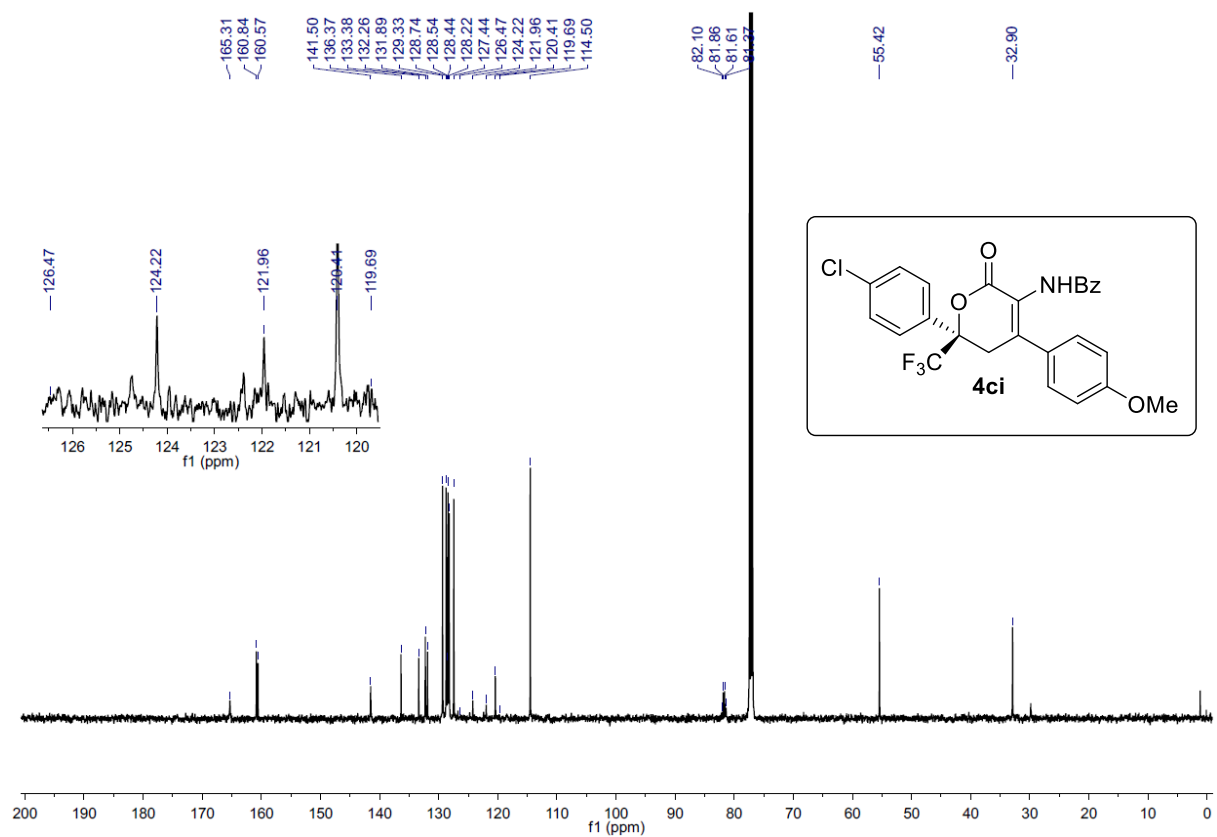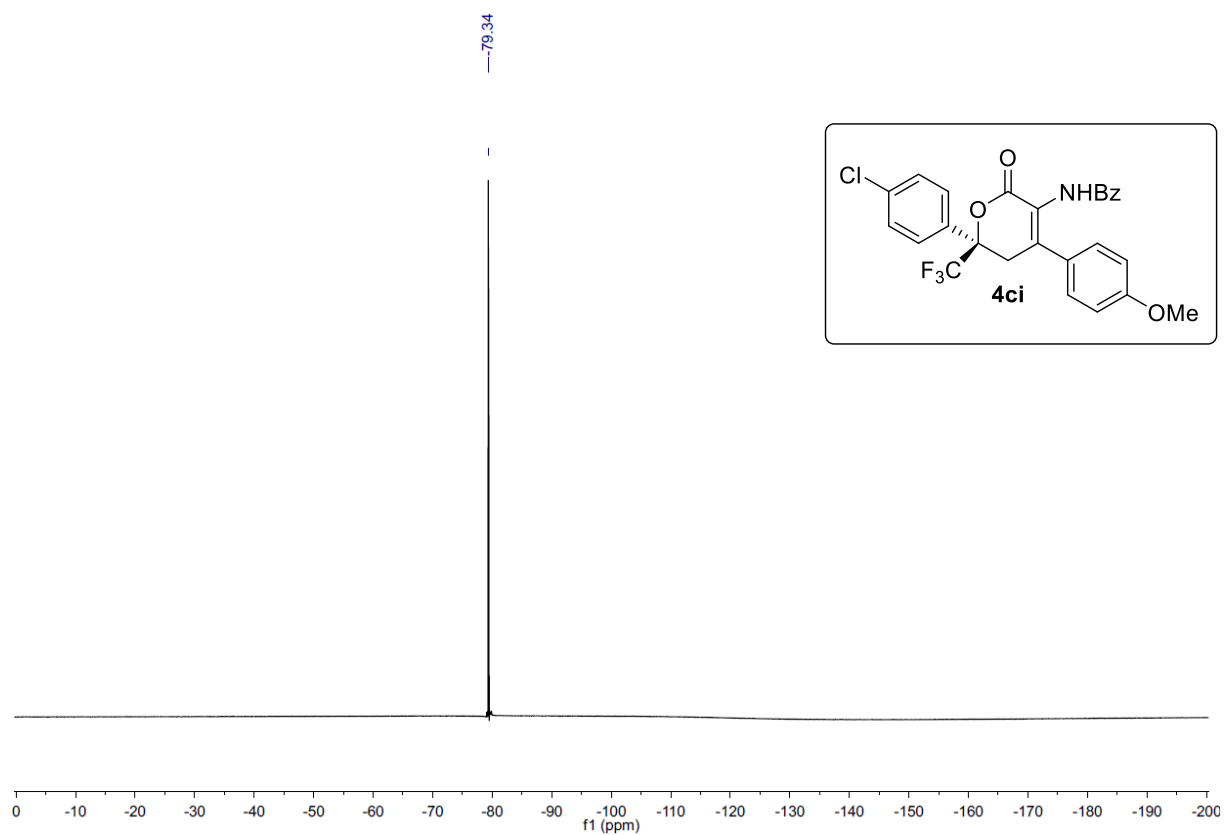

125 MHz  $^{13}\text{C}$  NMR and 373 MHz  $^{19}\text{F}$  NMR spectra of compound **4ci** in  $\text{CDCl}_3$

(xx) **(*R,Z*)-*N*-(3-(4-bromophenyl)-6,6,6-trifluoro-1-hydrazinyl-5-hydroxy-1-oxo-5-phenylhex-2-en-2-yl)benzamide (5)**

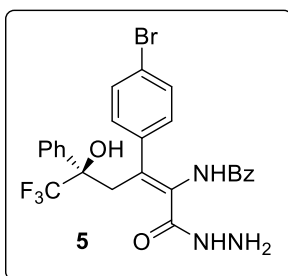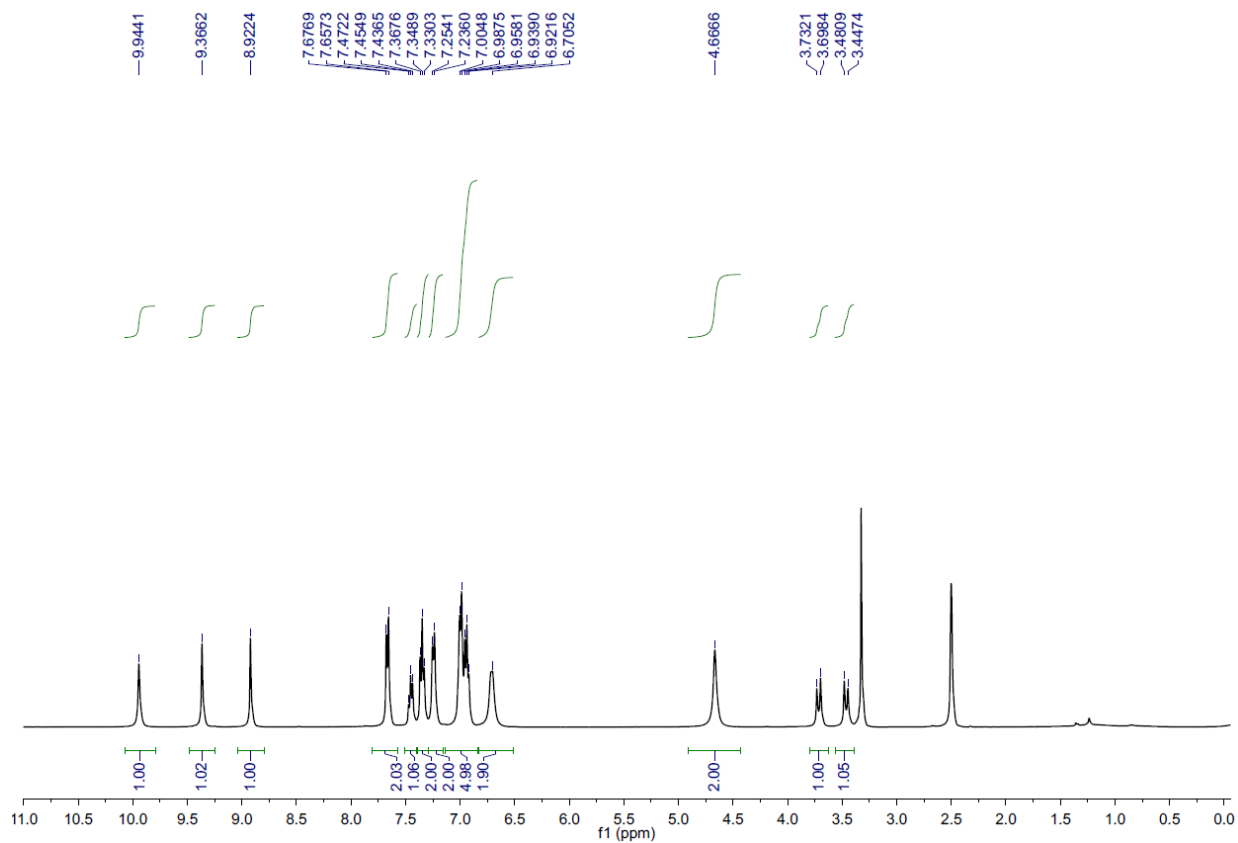

400 MHz  $^1\text{H}$  NMR spectrum of compound **5** in  $\text{DMSO}-d_6$



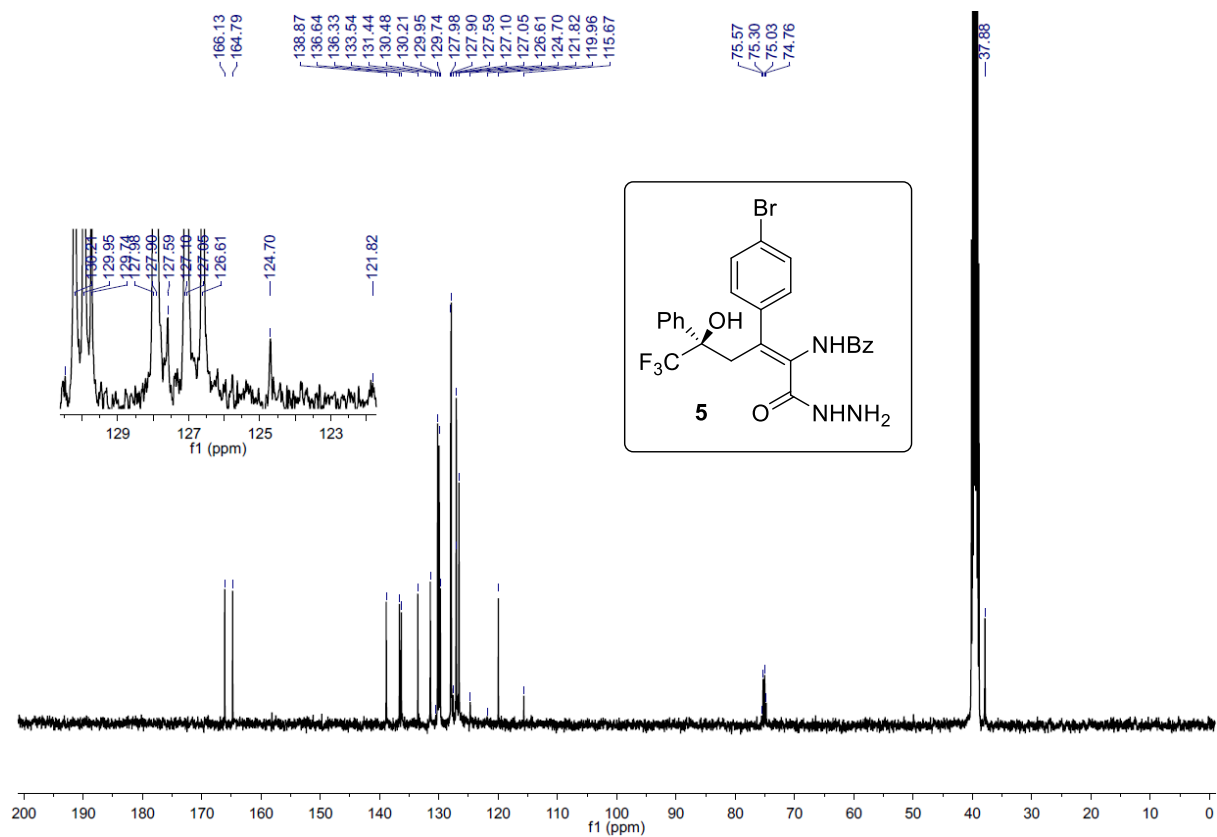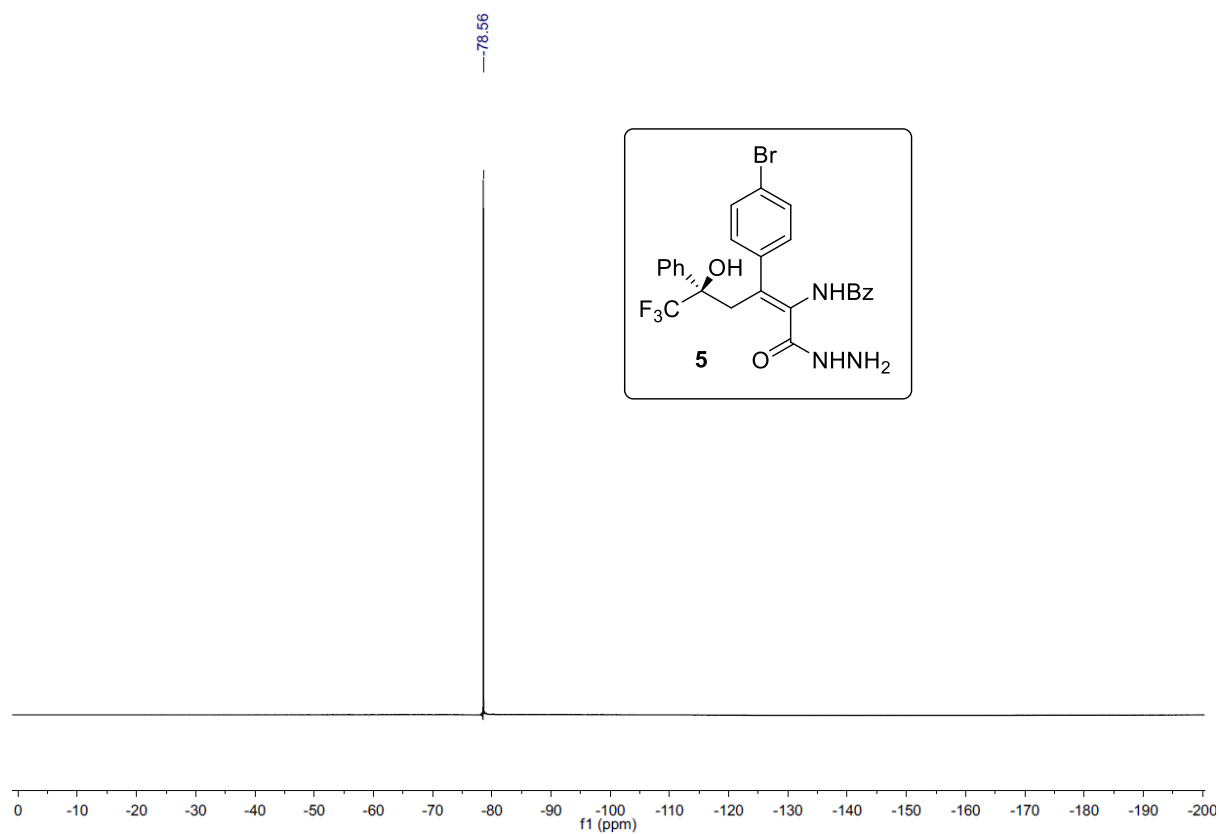

100 MHz  $^{13}\text{C}$  NMR and 373 MHz  $^{19}\text{F}$  NMR spectra of compound **5** in  $\text{DMSO-}d_6$

(xxi) **(*R,Z*)-*N*-(3-(4-bromophenyl)-6,6,6-trifluoro-5-hydroxy-1-oxo-5-phenyl-1-(pyrrolidin-1-yl)hex-2-en-2-yl)benzamide (6)**

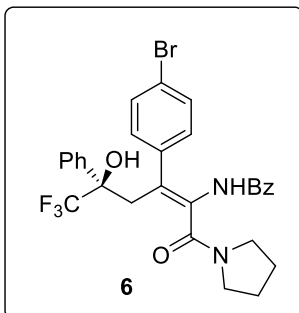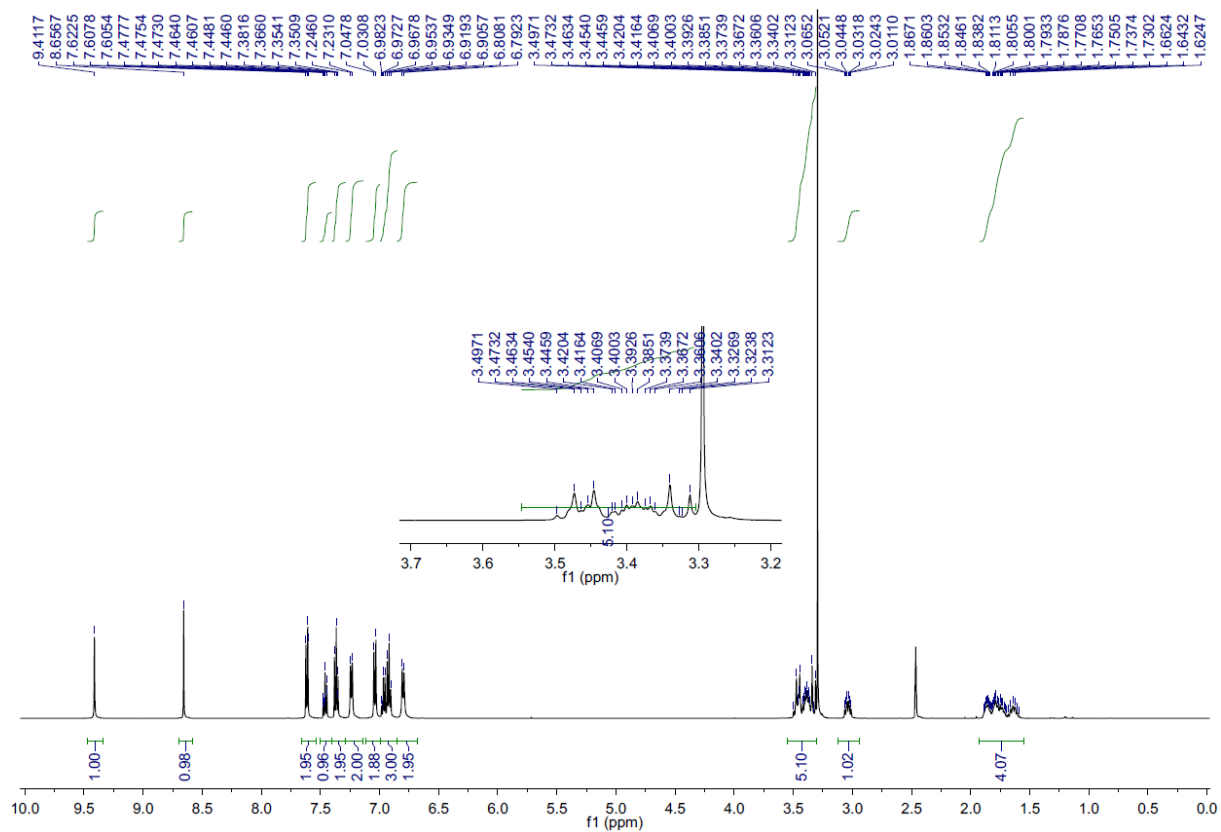

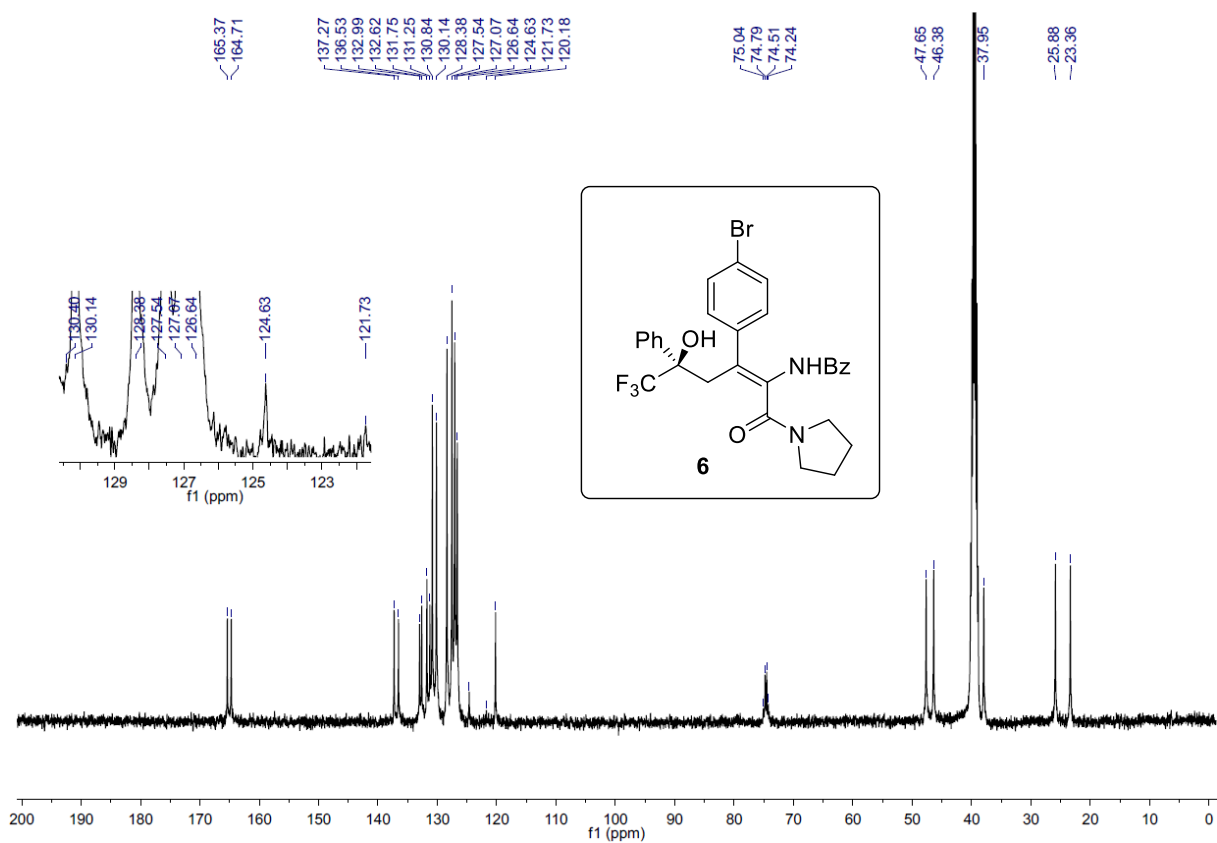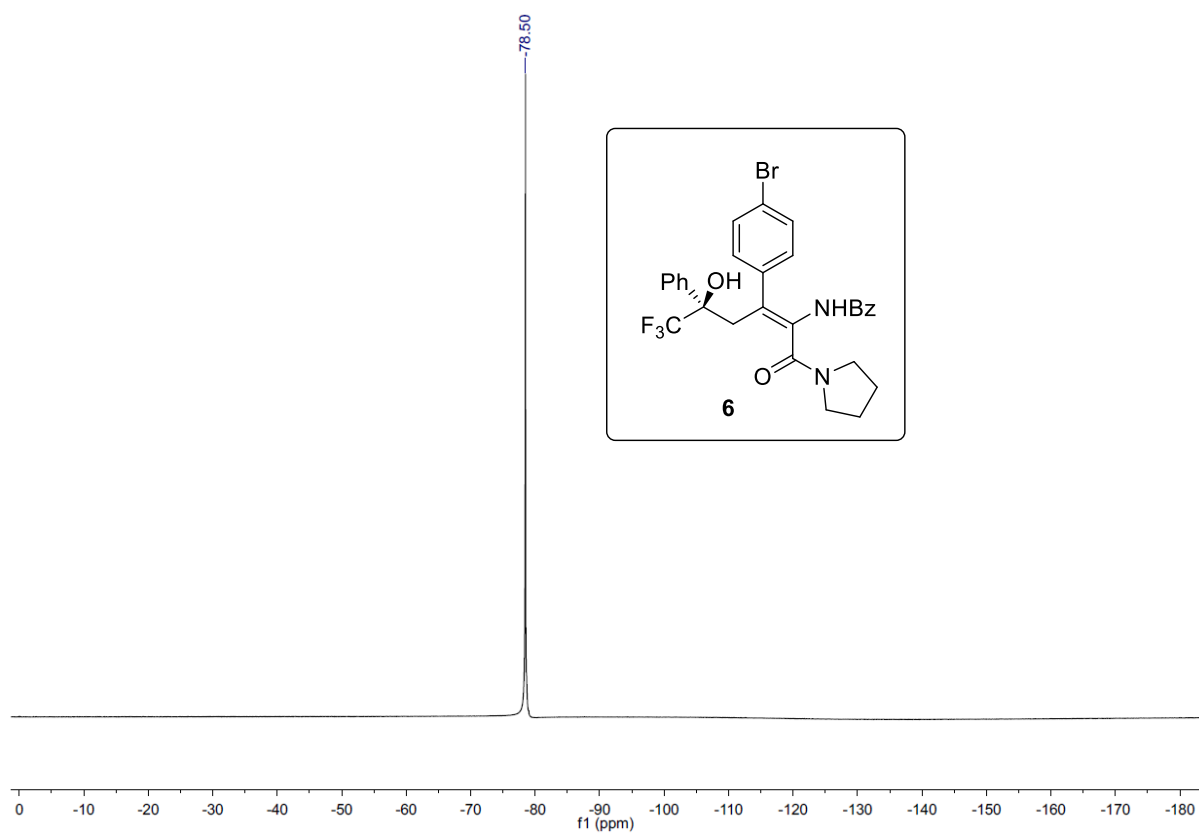

100 MHz <sup>13</sup>C NMR and 373 MHz <sup>19</sup>F NMR spectra of compound **6** in DMSO-*d*<sub>6</sub>

## 5. HPLC graphs:

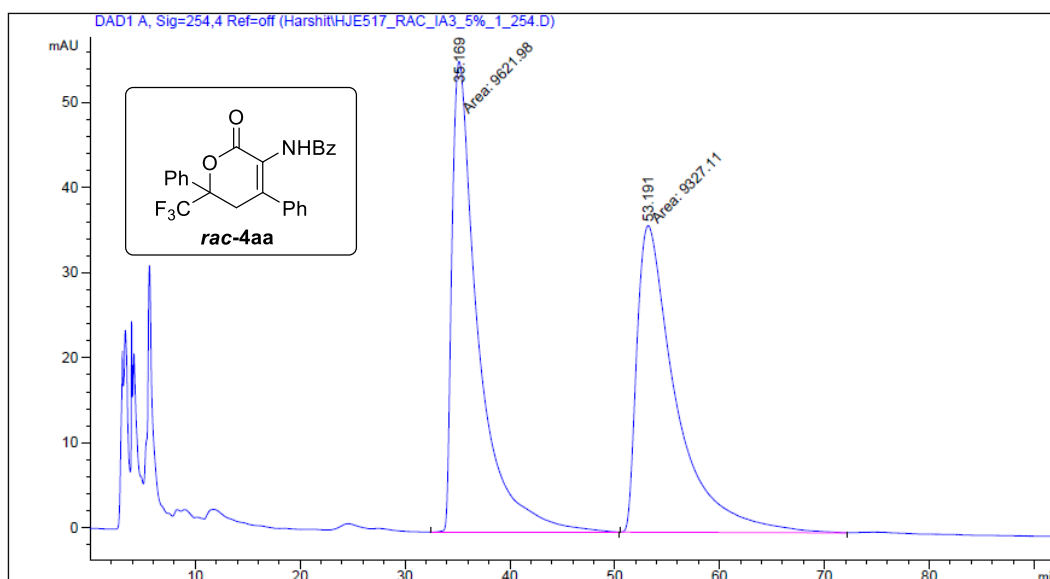

HPLC graph of racemic **4aa**

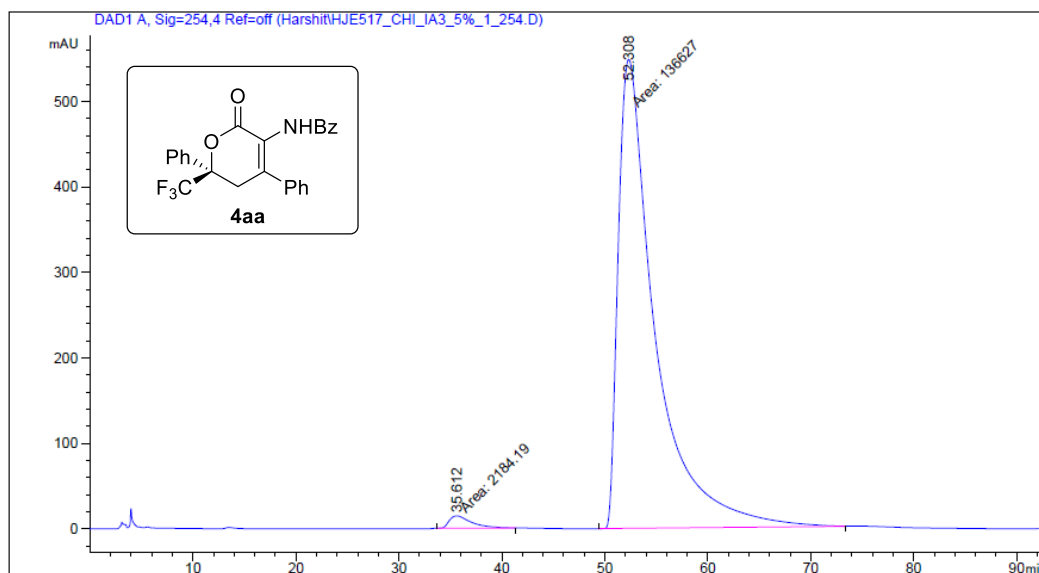

HPLC graph of enantioenriched **4aa**

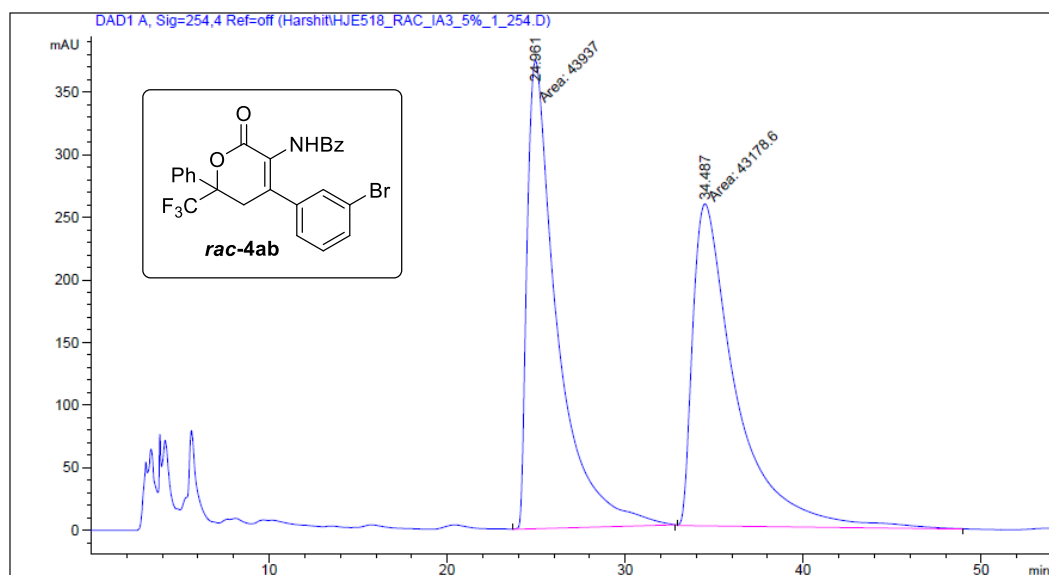

HPLC graph of racemic **4ab**

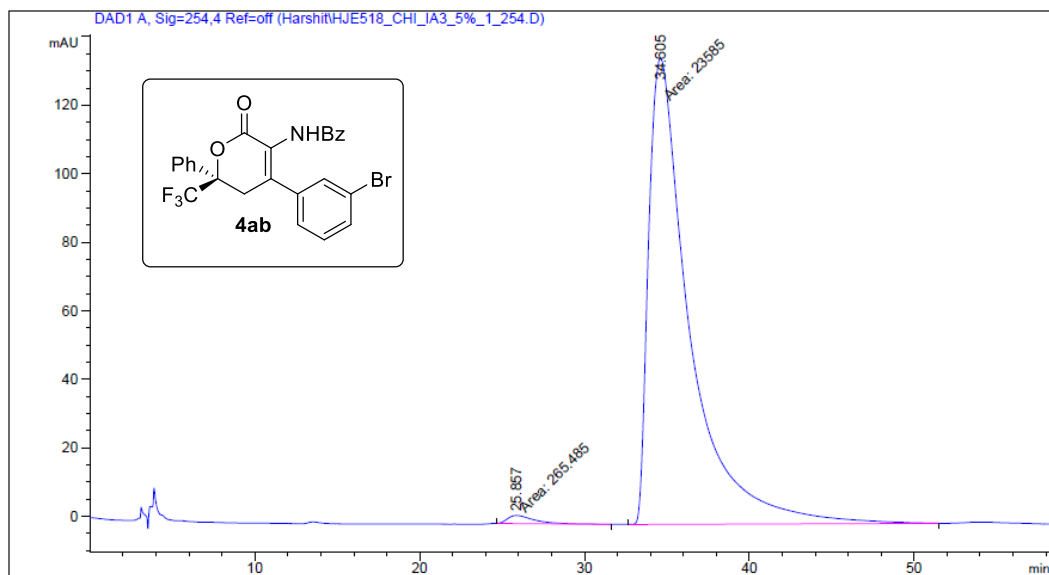

HPLC graph of enantioenriched **4ab**

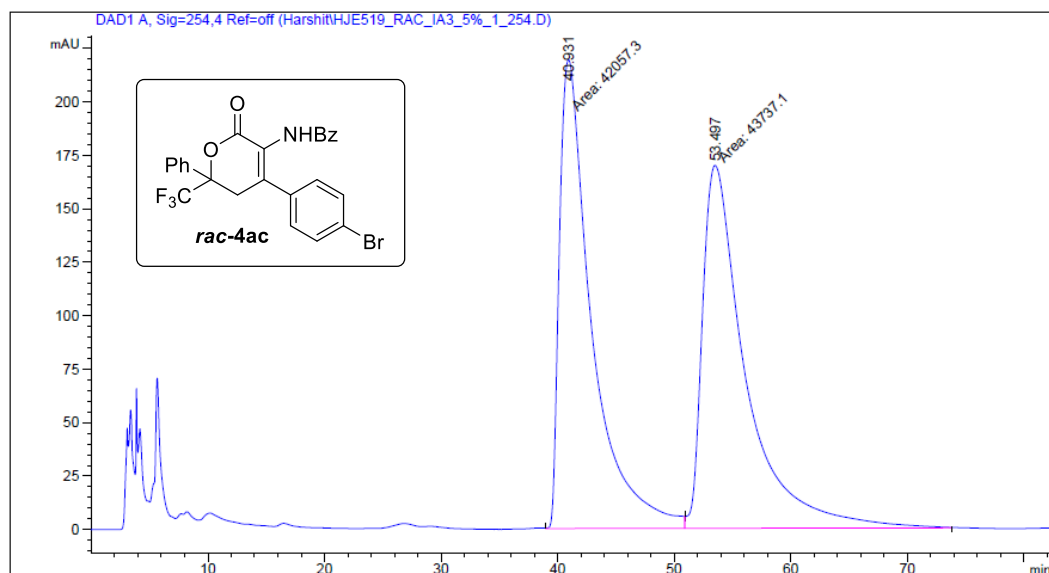

HPLC graph of racemic **4ac**

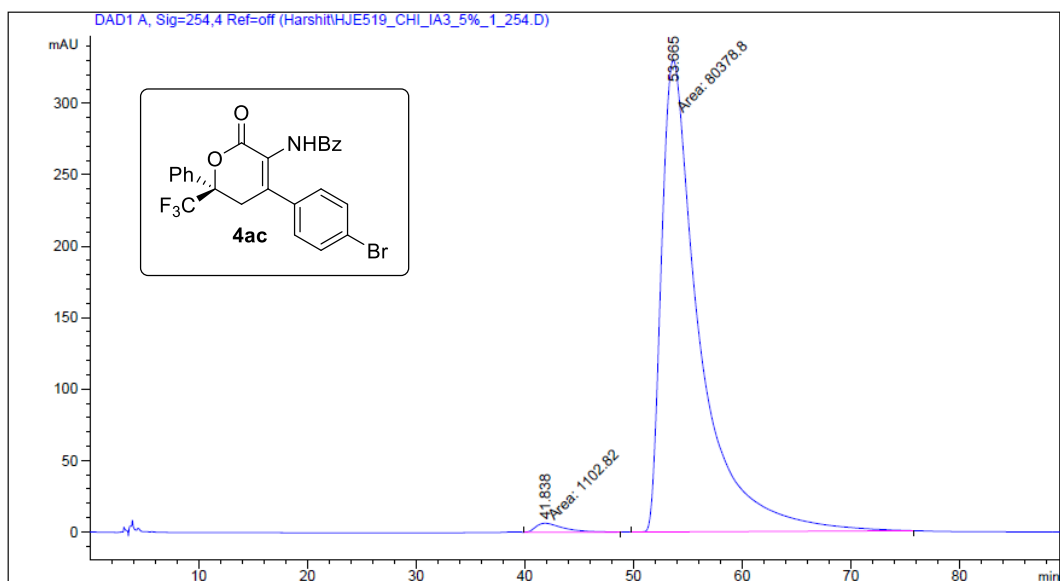

HPLC graph of enantioenriched **4ac**

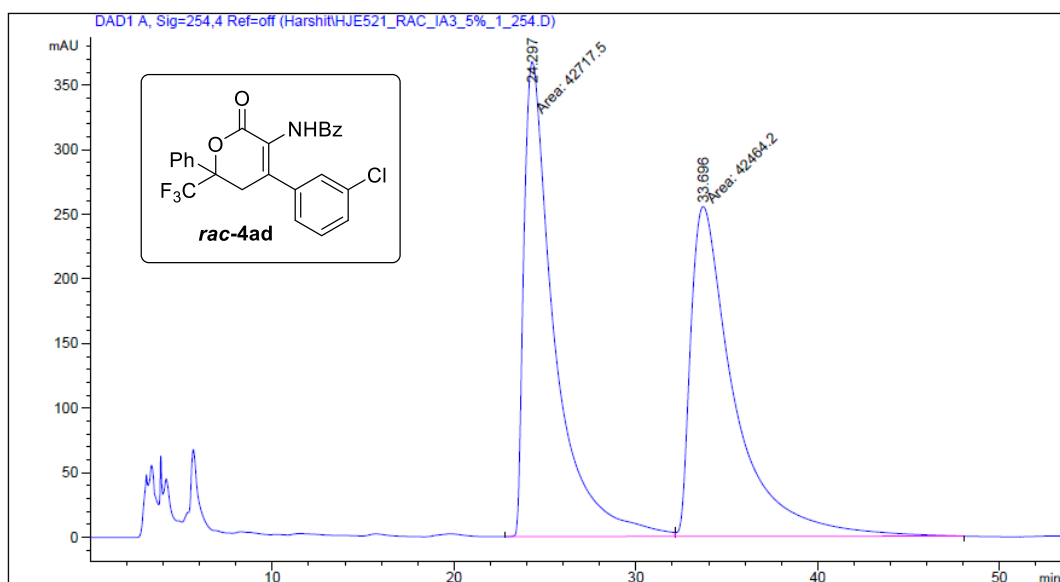

HPLC graph of racemic **4ad**

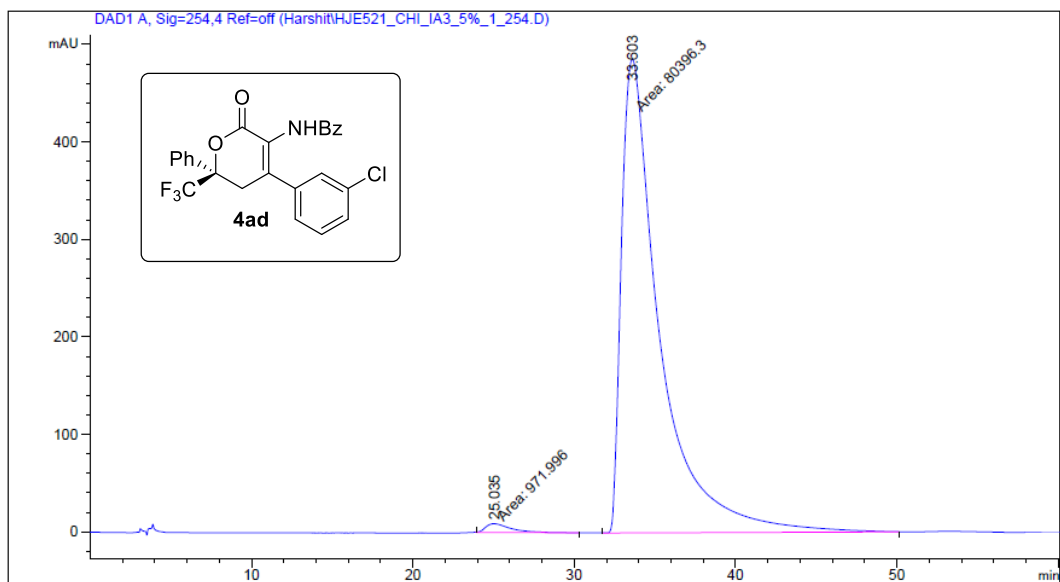

HPLC graph of enantioenriched **4ad**

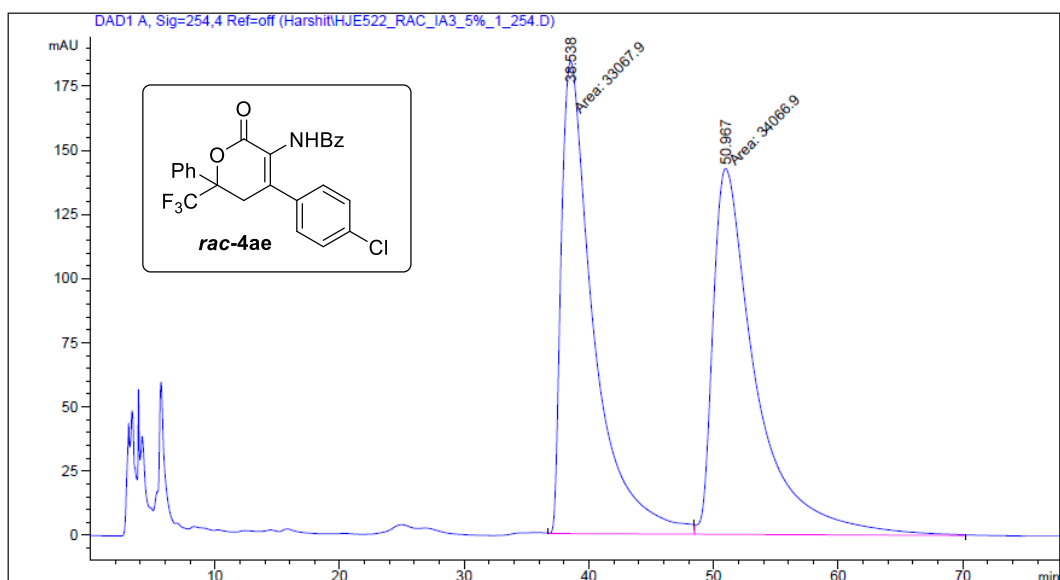

HPLC graph of racemic **4ae**

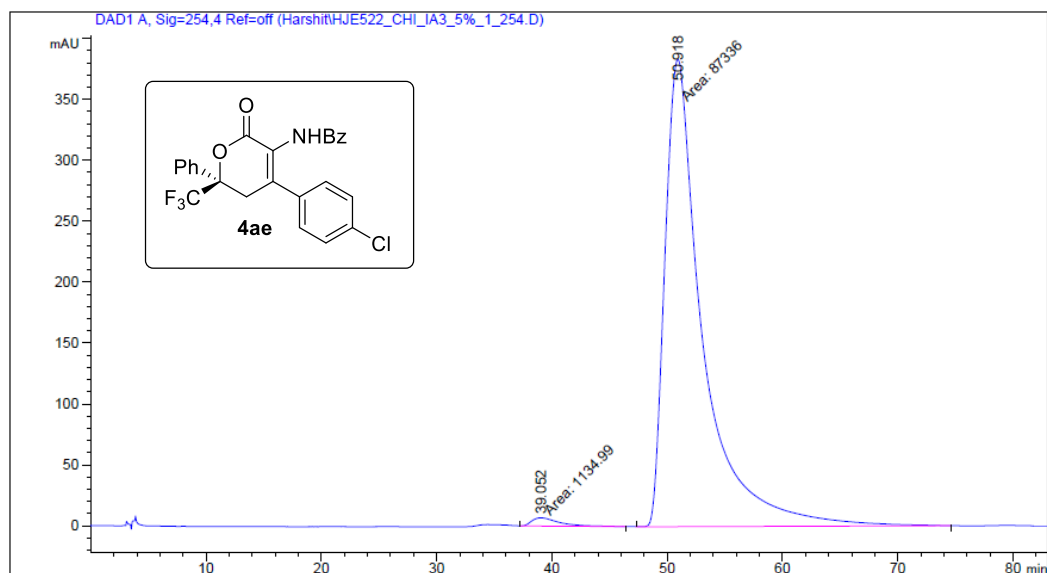

HPLC graph of enantioenriched **4ae**



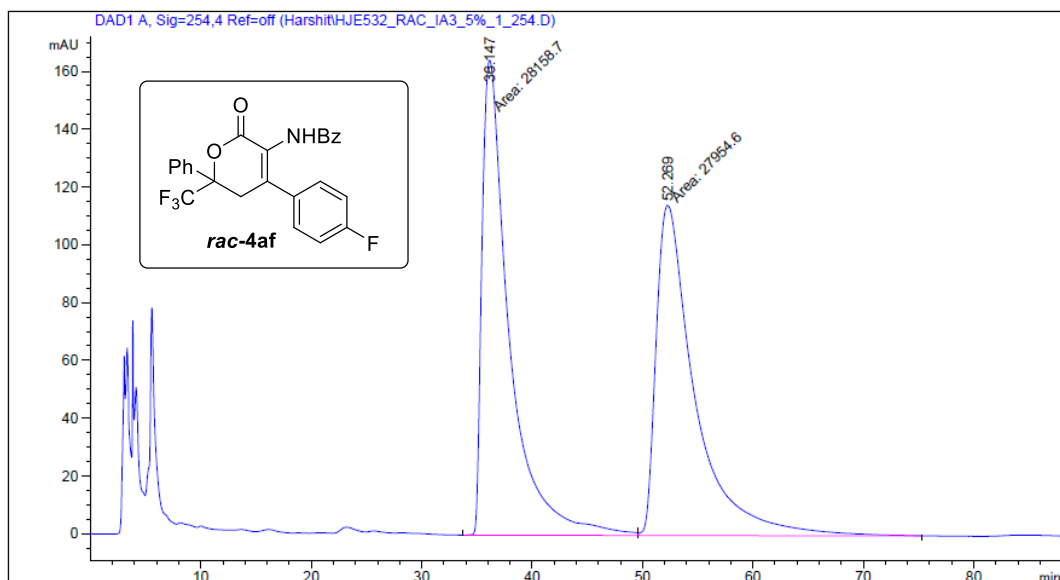

HPLC graph of racemic **4af**

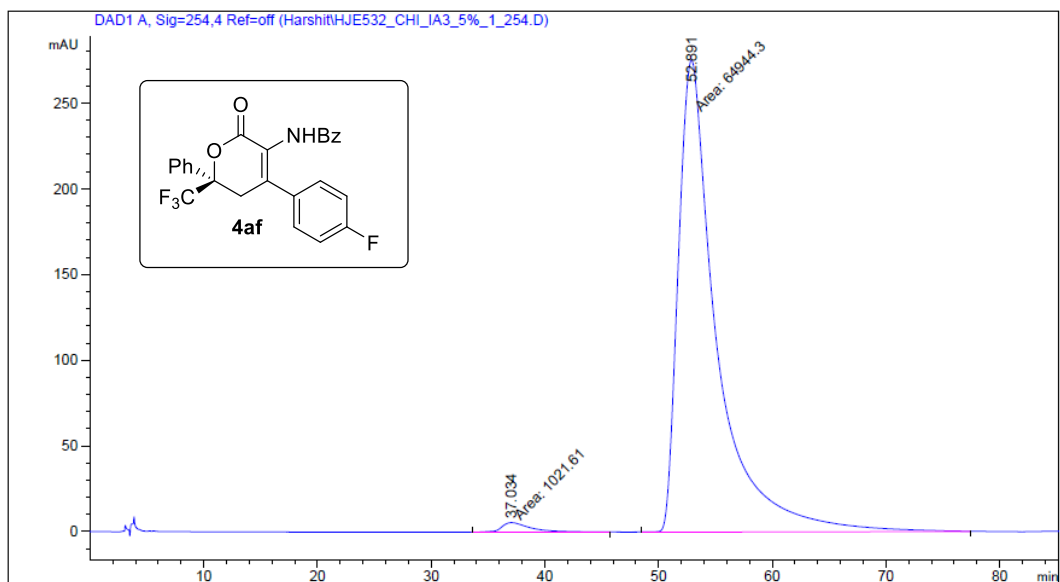

HPLC graph of enantioenriched **4af**

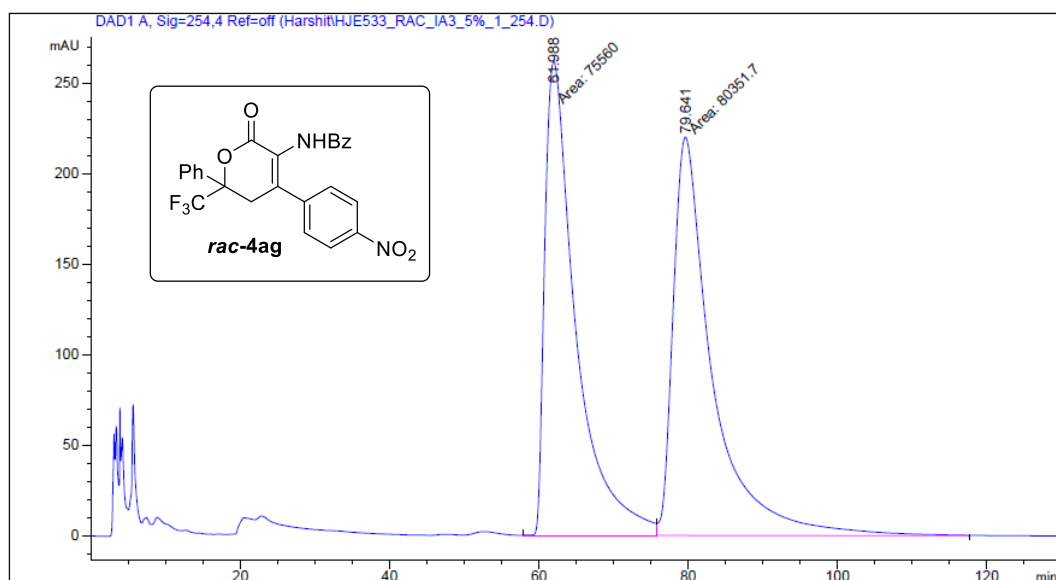

HPLC graph of racemic **4ag**

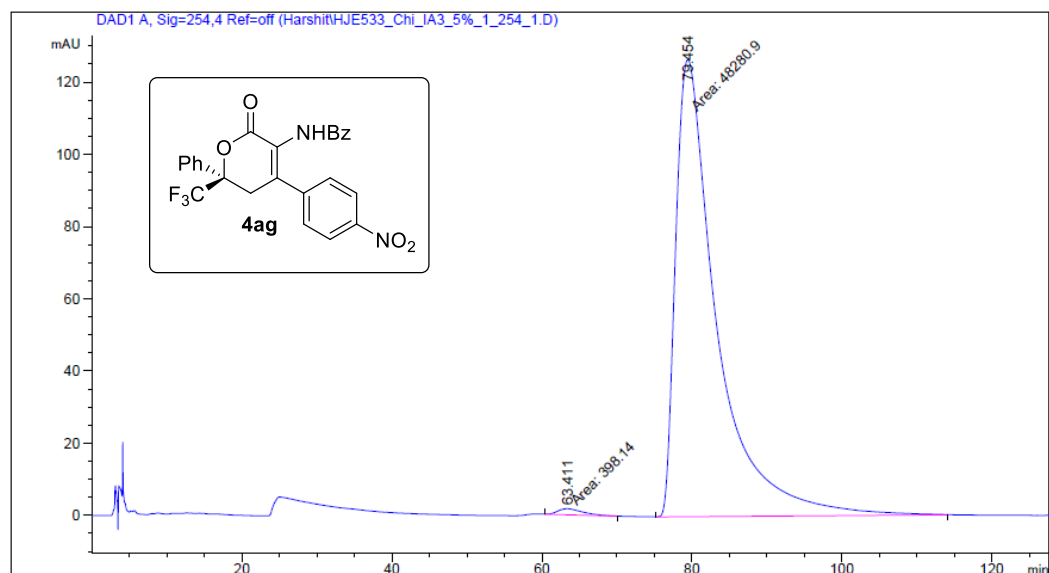

HPLC graph of enantioenriched **4ag**

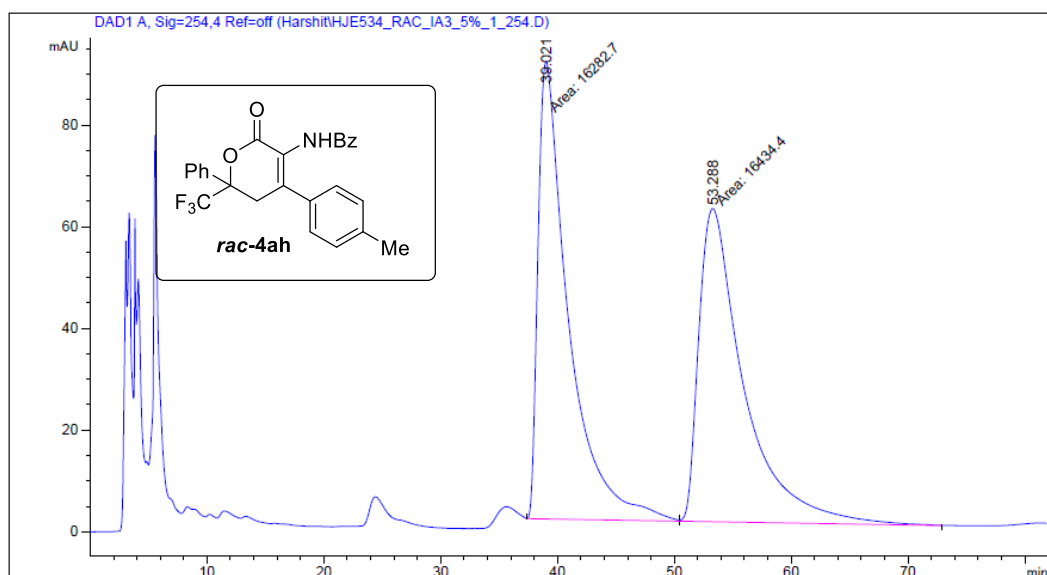

HPLC graph of racemic **4ah**

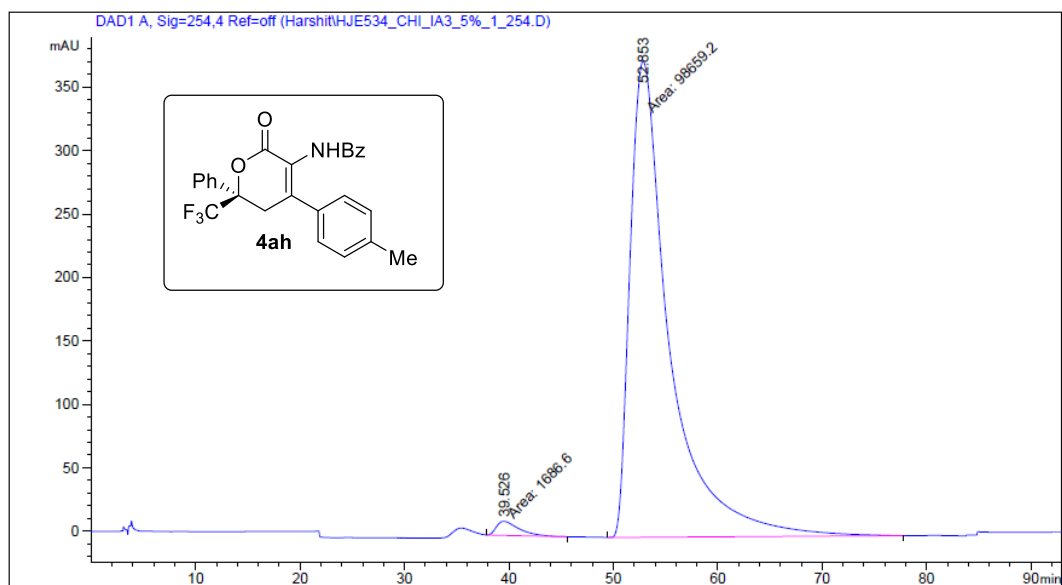

HPLC graph of enantioenriched **4ah**

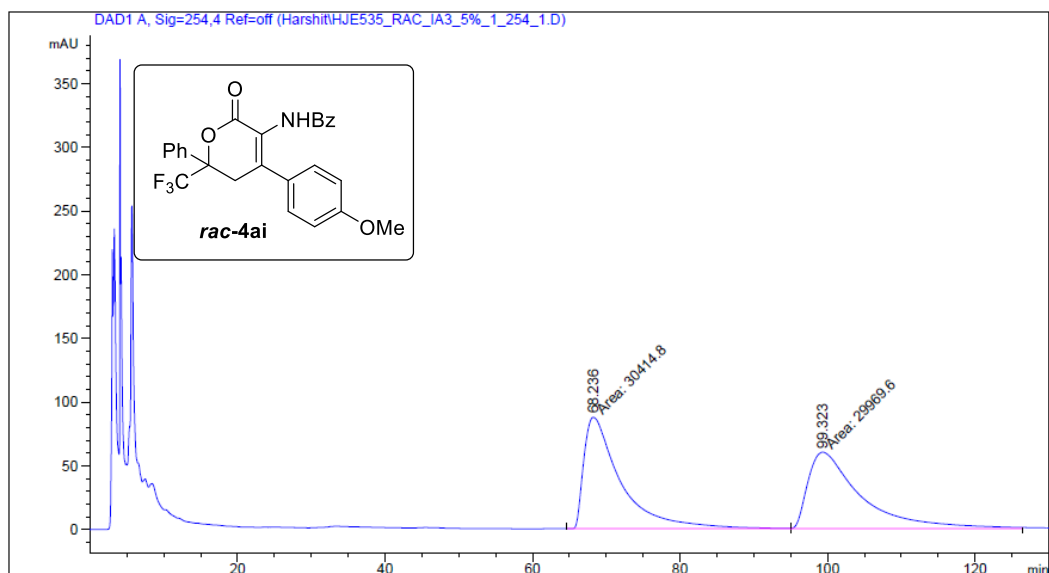

HPLC graph of racemic **4ai**

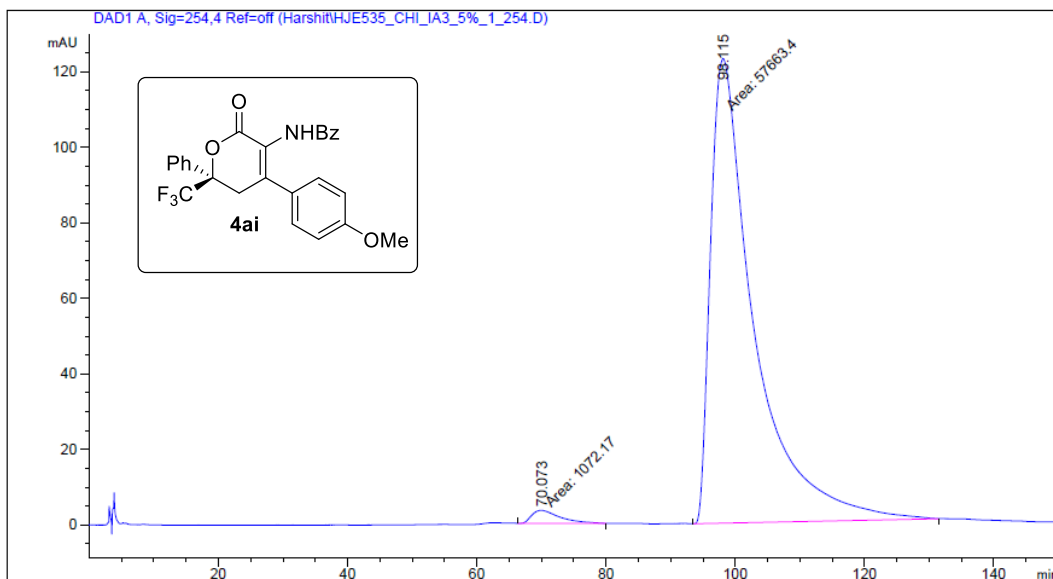

HPLC graph of enantioenriched **4ai**

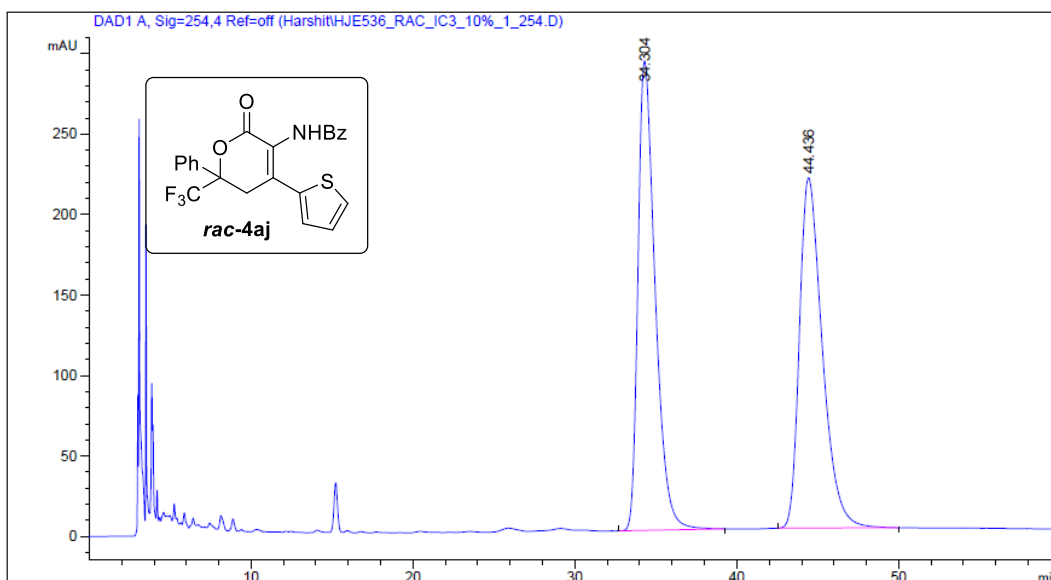

| Peak # | RetTime [min] | Type | Width [min] | Area [mAU*s] | Height [mAU] | Area %  |
|--------|---------------|------|-------------|--------------|--------------|---------|
| 1      | 34.304        | BB   | 1.1157      | 2.14452e4    | 291.70615    | 50.0935 |
| 2      | 44.436        | BB   | 1.4874      | 2.13652e4    | 217.62785    | 49.9065 |

HPLC graph of racemic **4aj**

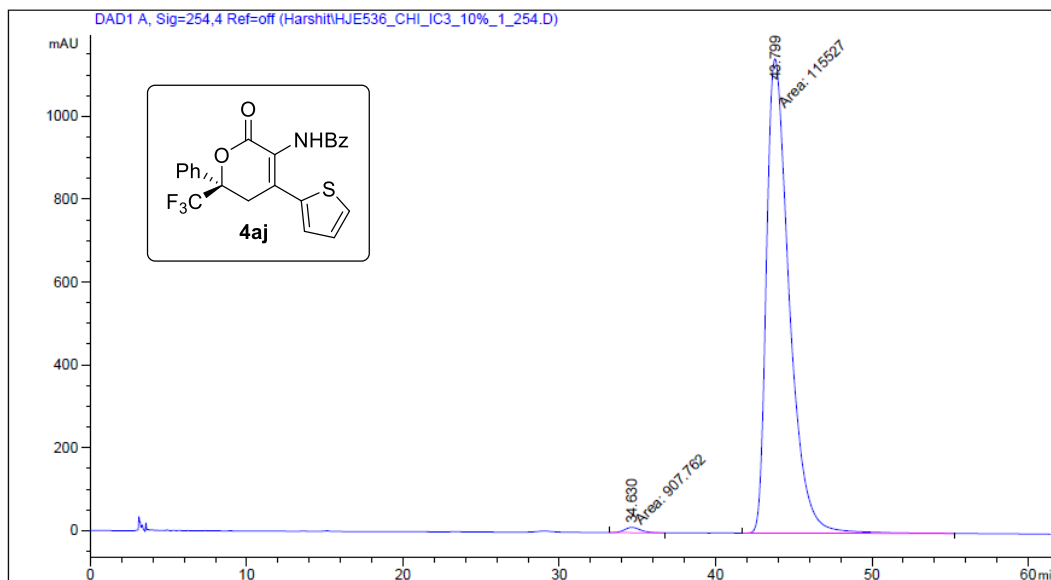

| Peak # | RetTime [min] | Type | Width [min] | Area [mAU*s] | Height [mAU] | Area %  |
|--------|---------------|------|-------------|--------------|--------------|---------|
| 1      | 34.630        | MM   | 1.1869      | 907.76239    | 12.74672     | 0.7796  |
| 2      | 43.799        | MM   | 1.6813      | 1.15527e5    | 1145.20691   | 99.2204 |

HPLC graph of enantioenriched **4aj**

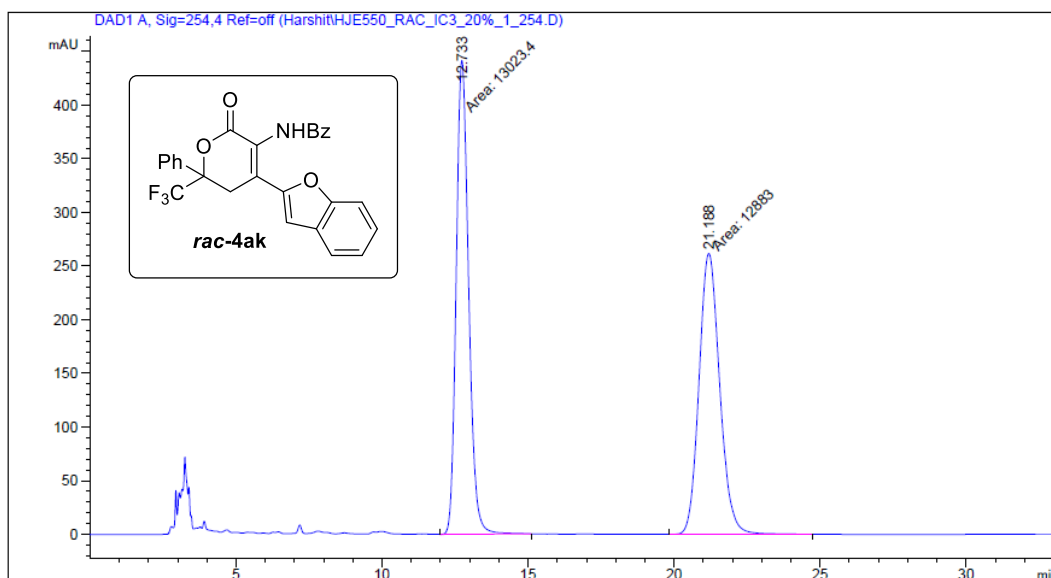

HPLC graph of racemic **4ak**

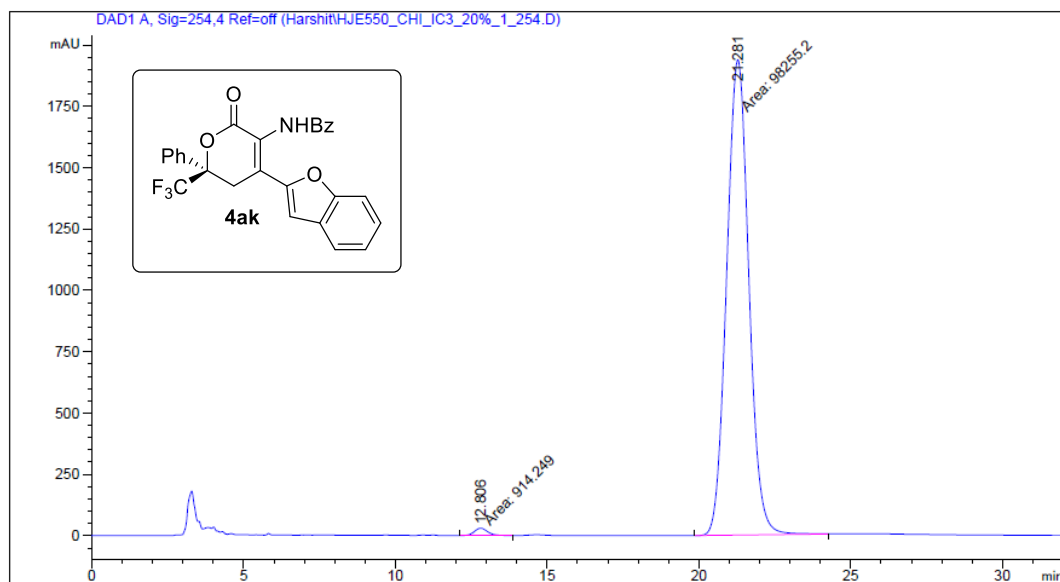

HPLC graph of enantioenriched **4ak**

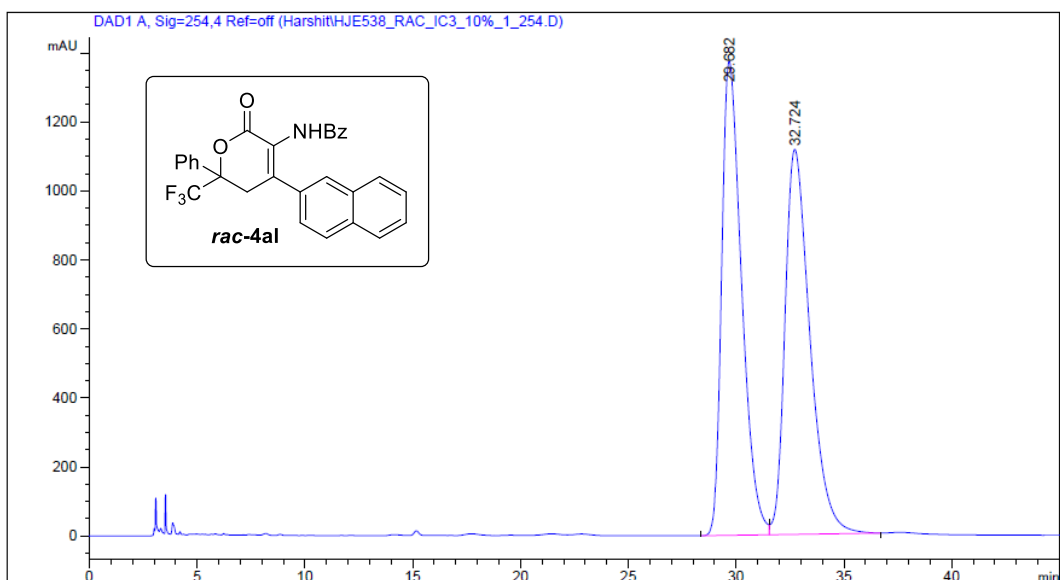

| Peak # | RetTime [min] | Type | Width [min] | Area [mAU*s] | Height [mAU] | Area %  |
|--------|---------------|------|-------------|--------------|--------------|---------|
| 1      | 29.682        | BV   | 0.9826      | 8.82047e4    | 1374.67322   | 49.6344 |
| 2      | 32.724        | VB   | 1.2119      | 8.95040e4    | 1115.67712   | 50.3656 |

HPLC graph of racemic **4al**

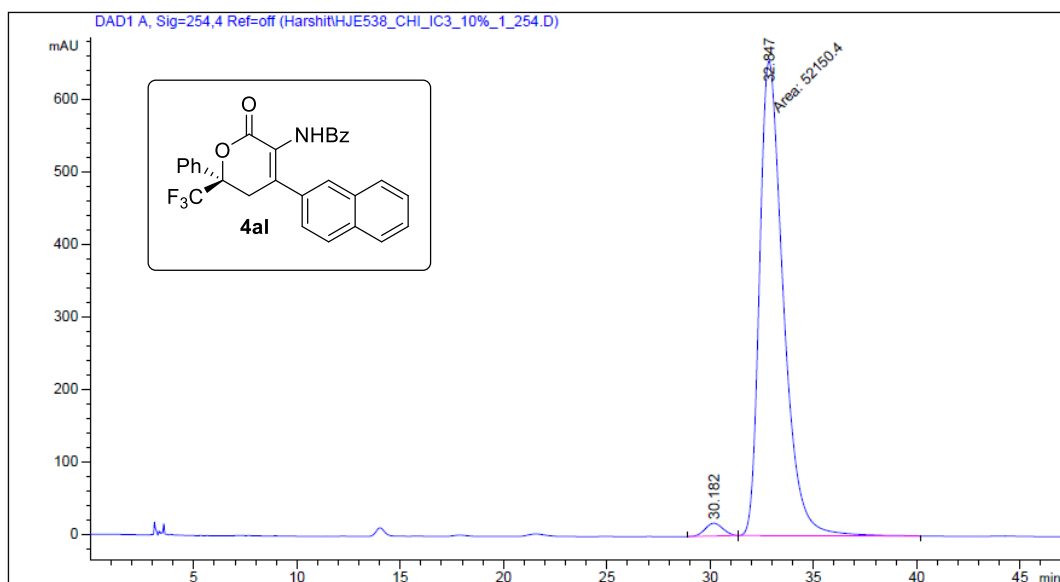

| Peak # | RetTime [min] | Type | Width [min] | Area [mAU*s] | Height [mAU] | Area %  |
|--------|---------------|------|-------------|--------------|--------------|---------|
| 1      | 30.182        | BB   | 0.8760      | 1053.44263   | 17.65934     | 1.9800  |
| 2      | 32.847        | MM   | 1.3284      | 5.21504e4    | 654.30878    | 98.0200 |

HPLC graph of enantioenriched **4al**

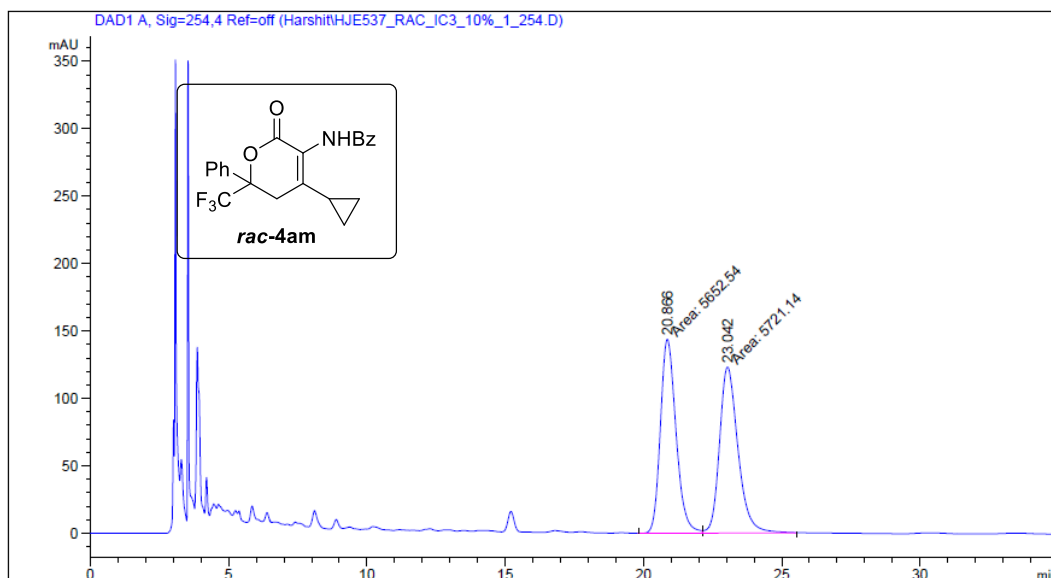

HPLC graph of racemic **4am**

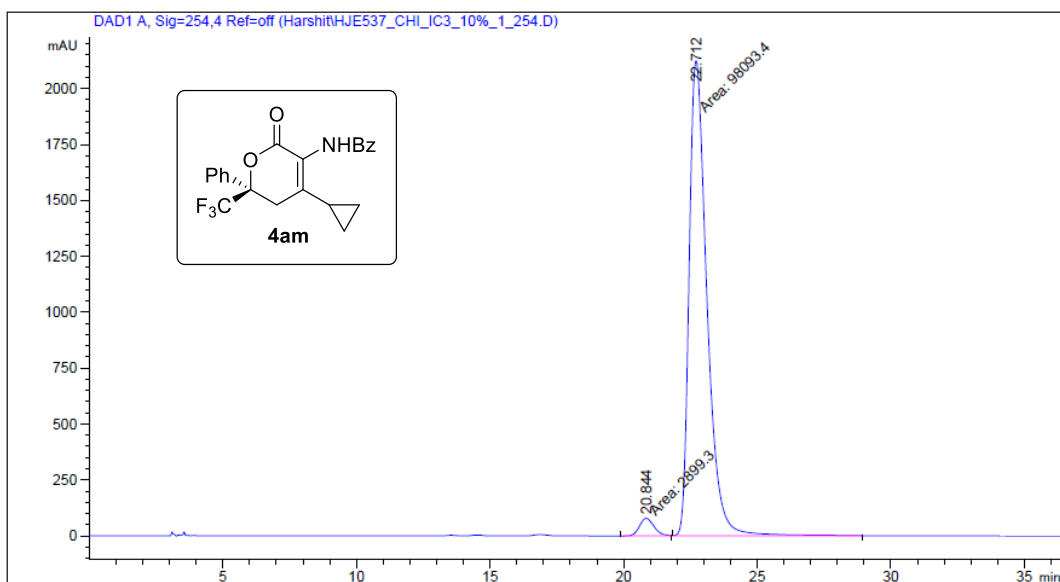

HPLC graph of enantioenriched **4am**



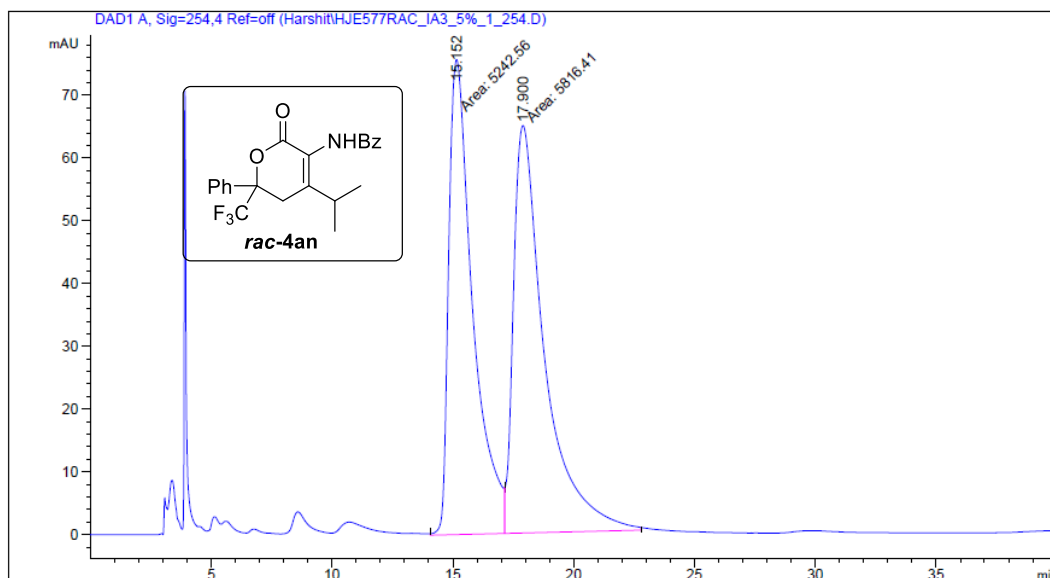

HPLC graph of racemic **4an**

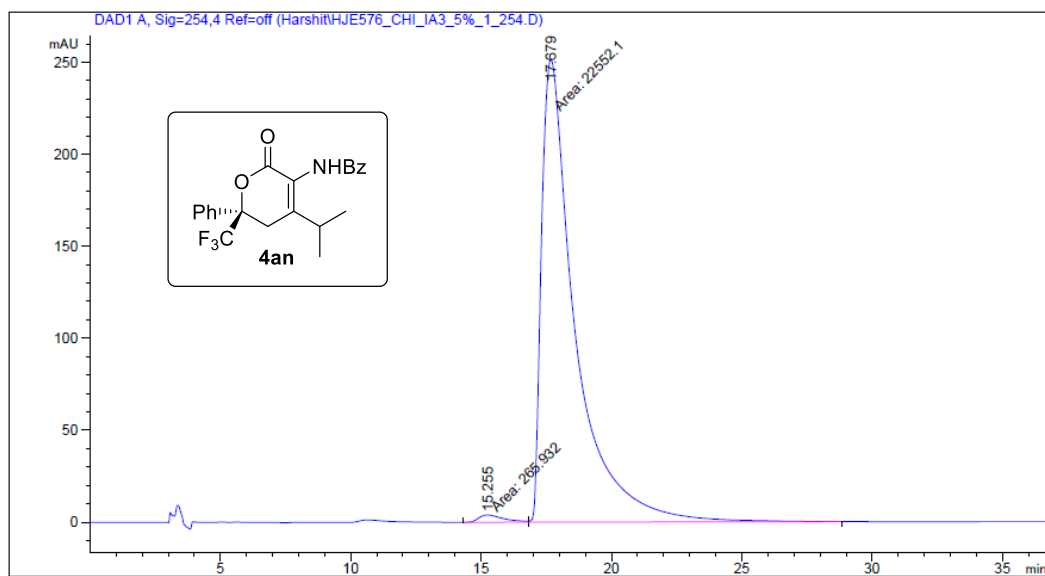

HPLC graph of enantioenriched **4an**

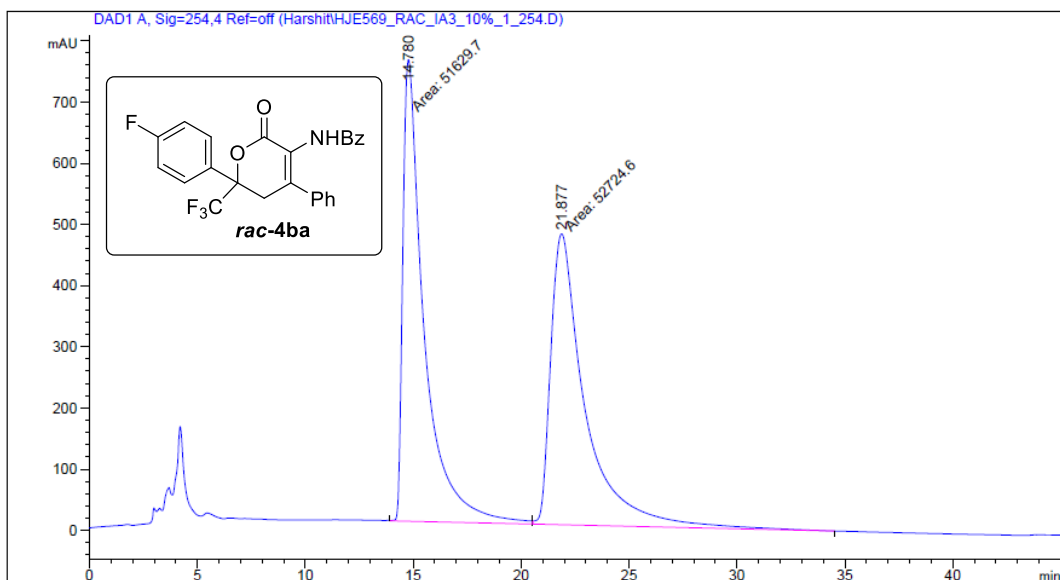

HPLC graph of racemic **4ba**

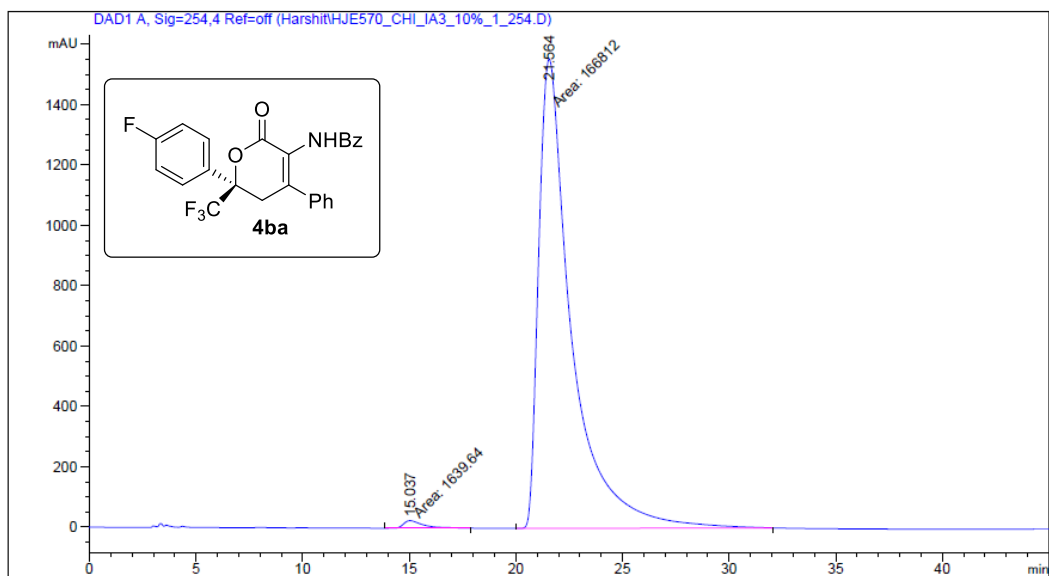

HPLC graph of enantioenriched **4ba**

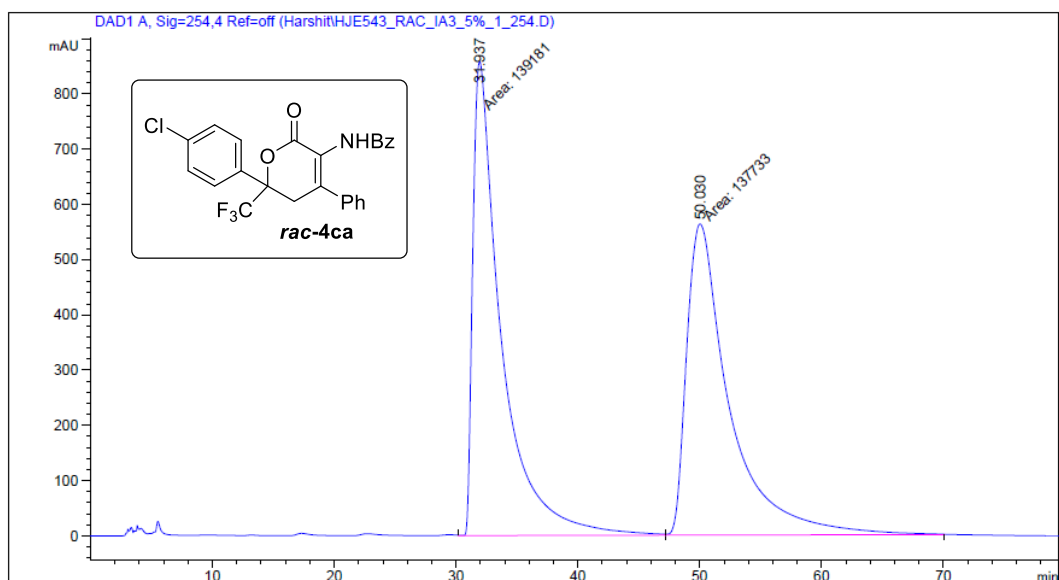

HPLC graph of racemic **4ca**

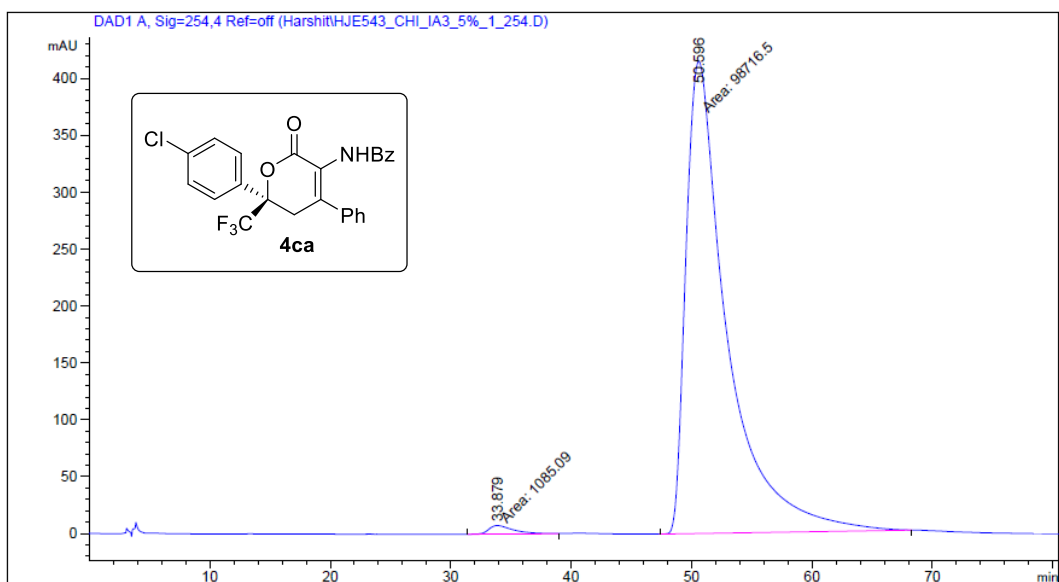

HPLC graph of enantioenriched **4ca**

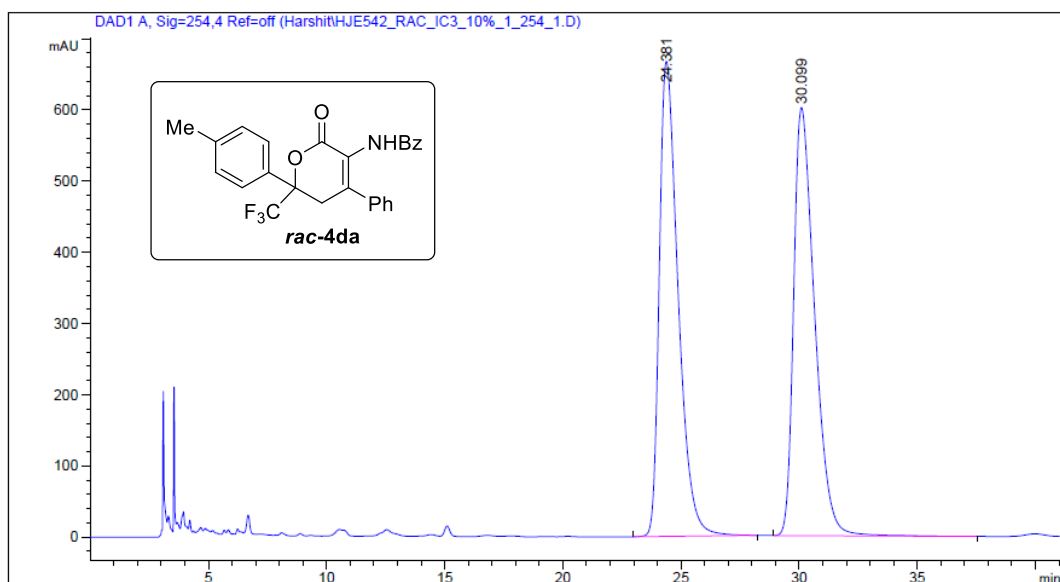

HPLC graph of racemic **4da**

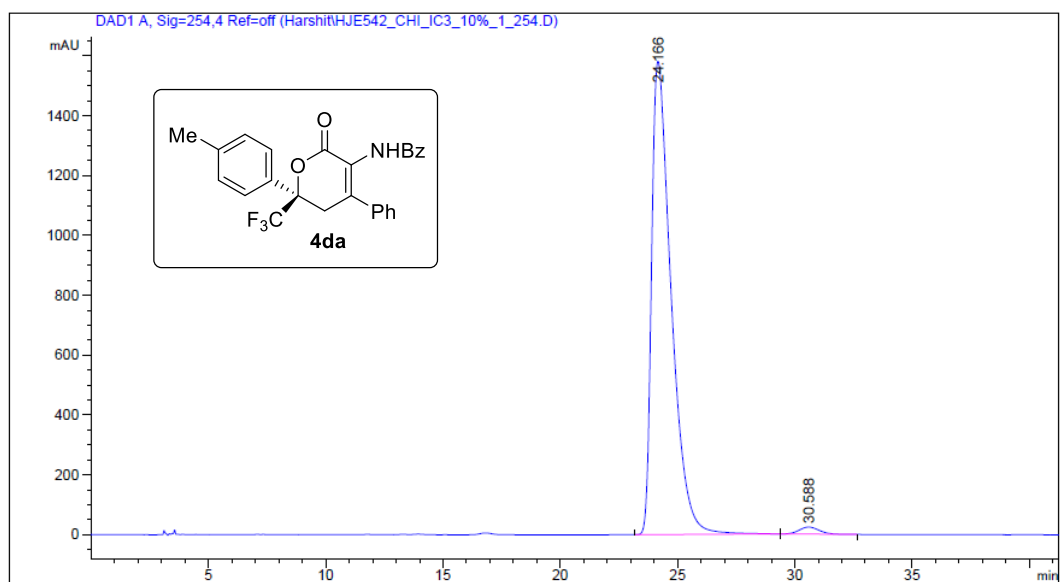

HPLC graph of enantioenriched **4da**

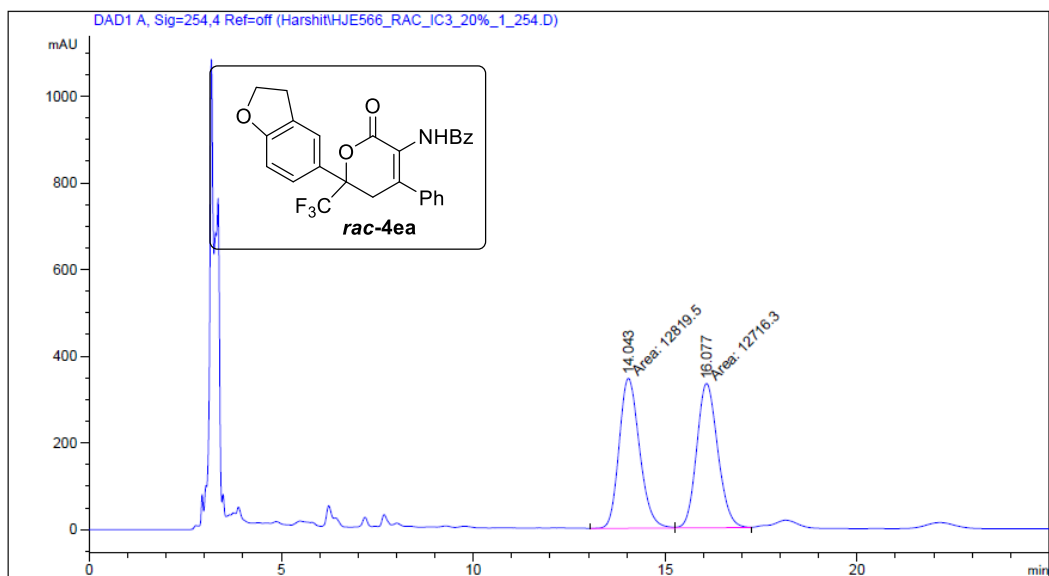

HPLC graph of racemic **4ea**

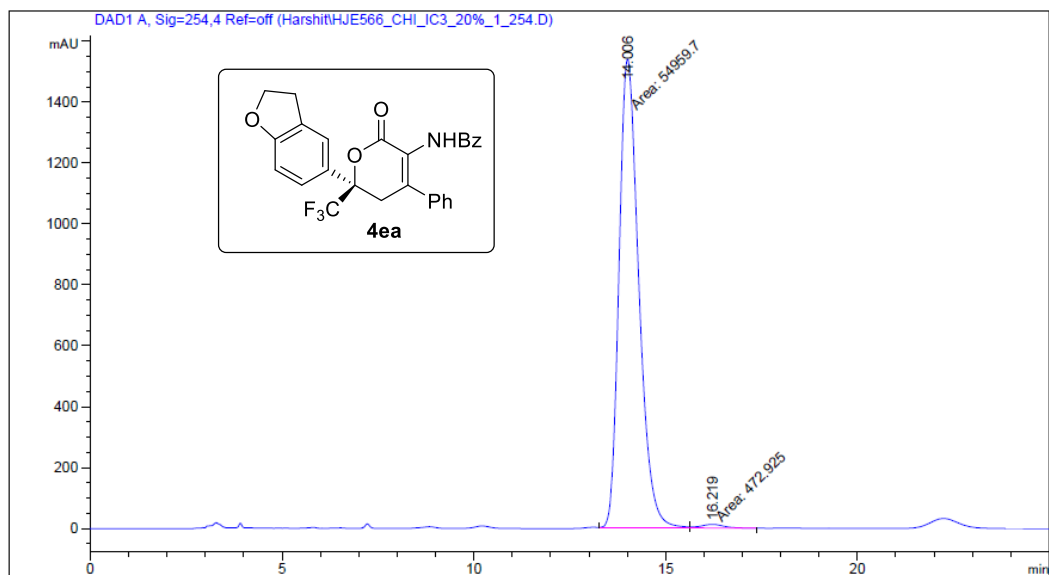

HPLC graph of enantioenriched **4ea**

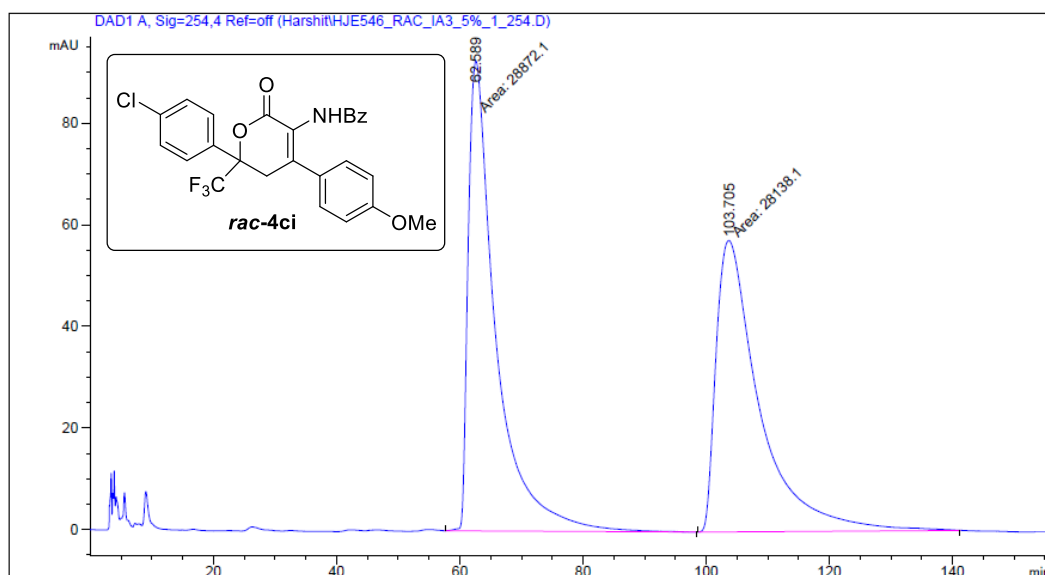

HPLC graph of racemic **4ci**

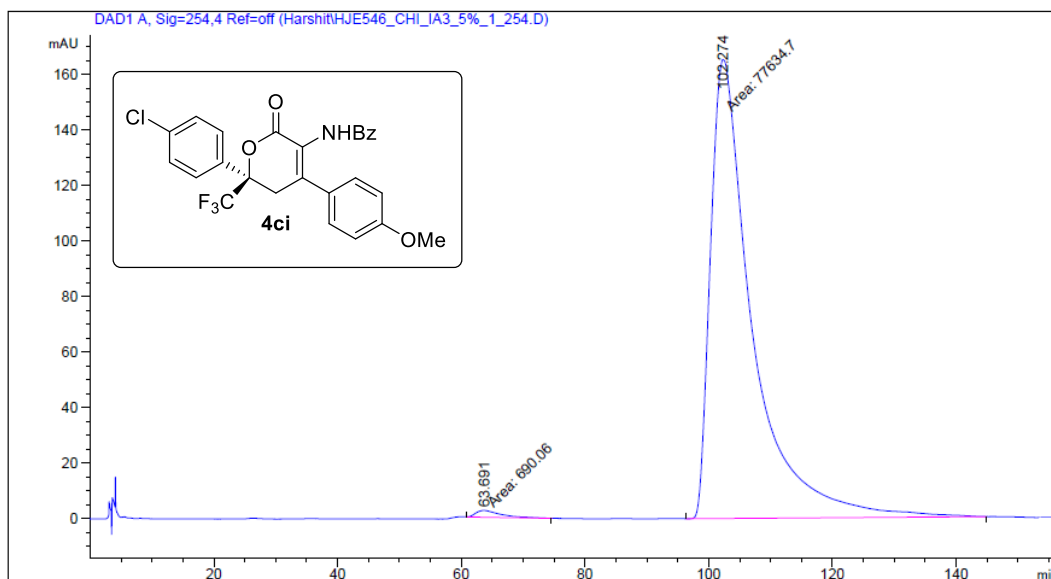

HPLC graph of enantioenriched **4ci**

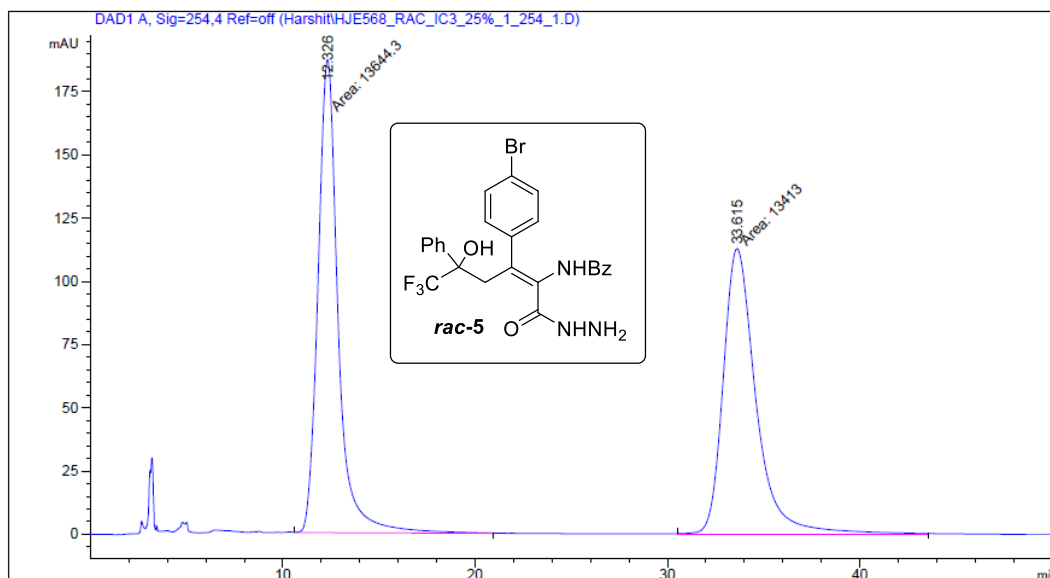

HPLC graph of racemic **5**

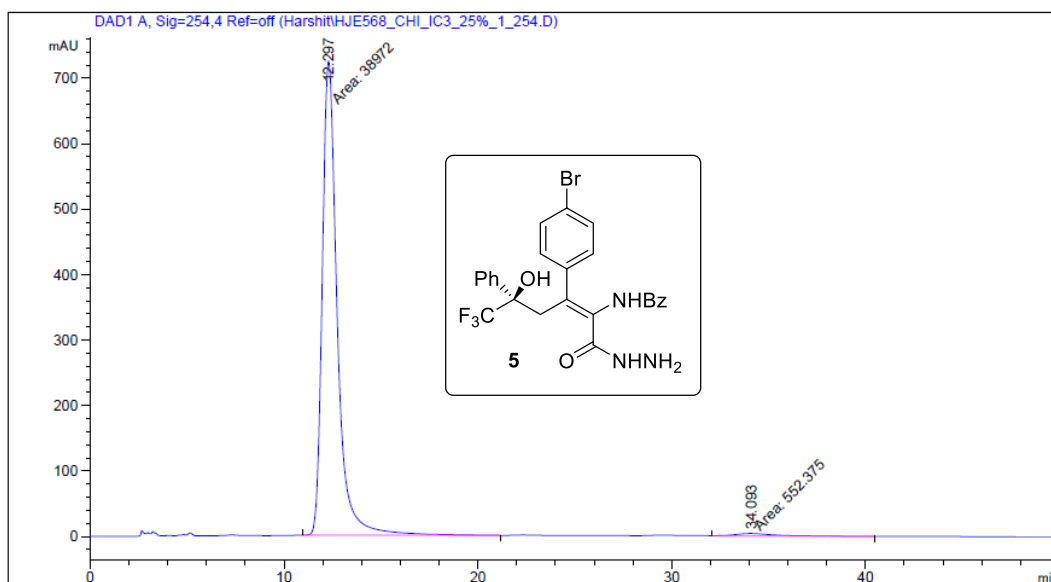

HPLC graph of enantioenriched **5**
